# Supplementary material for: Efficacy and Safety of Ginkgo Biloba Pills for Coronary Heart Disease with Impaired Glucose Regulation: Study Protocol for a Series of N-of-1 Randomized, Double-Blind, Placebo-Controlled Trials
Source: PubMed Central journal article supplement (PMC6204161; doi:10.1155/2018/7571629), 2018-10-14
Supplement: 7571629.f2.pdf [file 7571629.f2.pdf]

# CENT 2015 checklist

| Section/Topic                     | No   | Item                                                                                                                                                                                                                                                | Page in article |
|-----------------------------------|------|-----------------------------------------------------------------------------------------------------------------------------------------------------------------------------------------------------------------------------------------------------|-----------------|
| title and abstract                | 1a   | Identify as an “N-of-1 trial” in the title<br>For series; Identify as “a series of N-of-1 trials’ ’in the title                                                                                                                                     | 1               |
|                                   | 1b   | For specific guidance, see CENT guidance for abstracts                                                                                                                                                                                              | 1-2             |
| Introduction                      | 2a.1 | Scientific background and explanation of rationale                                                                                                                                                                                                  | 2-4             |
| Background and Objectives         | 2a.2 | Rationale for using N-of-1 approach                                                                                                                                                                                                                 | 4               |
|                                   | 2b   | Specific objectives or hypotheses                                                                                                                                                                                                                   | 4               |
| Methods                           | 3a   | Describe trial design, planned number of periods, and duration of each period(including run-in and wash out, if applicable)In addition for series; Whether and how the design was individualized to each participant, and explain the series design | 4               |
| Trial design                      | 3b   | Important changes to methods after trial start(such as eligibility criteria),with reasons                                                                                                                                                           | /               |
| Participant(s)                    | 4a   | Diagnosis or disorder, diagnostic criteria comorbid conditions, and concurrent therapies                                                                                                                                                            | 5-7             |
|                                   | 4b   | Settings and locations where the data were collected.                                                                                                                                                                                               | /               |
|                                   | 4c   | Whether the trial(s) represents a research study and if so, whether institutional ethics approval was obtained.                                                                                                                                     | 13              |
| Interventions                     | 5    | The interventions for each period with sufficient details to allow replication, including how and when they were actually administered                                                                                                              | 7               |
| Outcomes                          | 6a.1 | Completely defined pre-specified primary and secondary outcome measures, including how and when they were assessed                                                                                                                                  | 9-10            |
|                                   | 6a.2 | Description and measurement properties (validity and reliability) of outcome assessment tools                                                                                                                                                       | 9-10            |
|                                   | 6b   | Any changes to trial outcomes after the trial commenced, with reasons                                                                                                                                                                               | /               |
| Sample size                       | 7a   | How sample size was determined                                                                                                                                                                                                                      | /               |
|                                   | 7b   | When applicable, explanation of any interim analyses and stopping guidelines                                                                                                                                                                        | /               |
| Randomization Sequence generation | 8a   | Whether the order of treatment periods was randomized, with rationale, and method used to generate allocation sequence                                                                                                                              | 7               |
|                                   | 8b   | When applicable, type of randomization; details of any restrictions (such as pairs, blocking)                                                                                                                                                       | 7               |
|                                   | 8c   | Full, intended sequence of periods.                                                                                                                                                                                                                 | 7               |

|                                                      |       |                                                                                                                                                                                                                                                                                                 |    |
|------------------------------------------------------|-------|-------------------------------------------------------------------------------------------------------------------------------------------------------------------------------------------------------------------------------------------------------------------------------------------------|----|
| Allocation concealment mechanism                     | 9     | Mechanism used to implement the random allocation sequence (such as sequentially numbered containers), describing any steps taken to conceal the sequence until interventions were assigned                                                                                                     | 7  |
| Implementation                                       | 10    | Who generated the random allocation sequence, who enrolled participants, and who assigned participants to interventions                                                                                                                                                                         | /  |
| Blinding                                             | 11a   | If done, who was blinded after assignment to interventions (for example, participants, care providers, those assessing outcomes) and how                                                                                                                                                        | 8  |
|                                                      | 11b   | If relevant, description of the similarity of interventions                                                                                                                                                                                                                                     | 8  |
| Statistical methods                                  | 12a   | Methods used to summarize data and compare interventions for primary and secondary outcomes                                                                                                                                                                                                     | 14 |
|                                                      | 12b   | For series; If done, methods of quantitative synthesis of individual trial data, including subgroup analyses, adjusted analyses, and how heterogeneity between participants was assessed (for specific guidance on reporting syntheses of multiple trials, please consult the PRISMA Statement) | /  |
|                                                      | 12c   | Statistical methods used to account for carry over effect, period effects, and intra-subject correlation.                                                                                                                                                                                       | /  |
| Results                                              | 13a.1 | Number and sequence of periods completed, and any changes from original plan with reasons                                                                                                                                                                                                       | /  |
| Participant flow (a diagram is strongly recommended) | 13a.2 | For series; The number of participants who were enrolled, assigned to interventions, and analysed for the primary outcome                                                                                                                                                                       | /  |
|                                                      | 13b   | For each group, losses and exclusions after randomization, together with reasons                                                                                                                                                                                                                | /  |
| Recruitment                                          | 14a   | Dates defining the periods of recruitment and follow-up                                                                                                                                                                                                                                         | /  |
|                                                      | 14b   | Whether any periods were stopped early and/or whether trial was stopped early, with reason(s)                                                                                                                                                                                                   | /  |
| Baseline data                                        | 15    | A table showing baseline demographic and clinical characteristics for each group                                                                                                                                                                                                                | /  |
| Numbers analysed                                     | 16    | For each intervention, number of periods analysed. In addition for series; If quantitative synthesis was performed, number of trials for which data was synthesized                                                                                                                             | /  |
| Outcomes and estimation                              | 17a.1 | For each primary and secondary outcome, results for each period; an accompanying figure displaying the trial data is recommended                                                                                                                                                                | /  |
|                                                      | 17a.2 | For each primary and secondary outcome, the estimated effect size and its precision (such as 95% confidence interval). In addition for series; If quantitative synthesis was performed, group estimates                                                                                         | /  |

---

|                    |     |                                                                                                                                                                                                                |   |
|--------------------|-----|----------------------------------------------------------------------------------------------------------------------------------------------------------------------------------------------------------------|---|
|                    |     | of effect and precision for each primary and secondary outcome                                                                                                                                                 |   |
|                    | 17b | For binary outcomes, presentation of both absolute and relative effect sizes is recommended                                                                                                                    | / |
| Ancillary analyses | 18  | Results of any other analyses performed,, including assessment of carryover effects ,period effects, intra-subject correlation<br>In addition for series; If done, results of subgroup or sensitivity analyses | / |
| Harms              | 19  | All harms or unintended effects for each intervention. (for specific guidance see CONSORT for harms)                                                                                                           | / |
| Discussion         | 20  | Trial limitations, addressing sources of potential bias, imprecision, and, if relevant, multiplicity of analyses                                                                                               | / |
| Limitations        |     |                                                                                                                                                                                                                |   |
| Generalisability   | 21  | Generalizability (external validity, applicability)of the trial findings                                                                                                                                       | / |
| Interpretation     | 22  | Interpretation consistent with results, balancing benefits and harms, and considering other relevant evidence                                                                                                  | / |
| Other information  | 23  | Registration number and name of trial registry                                                                                                                                                                 | / |
| Registration       |     |                                                                                                                                                                                                                |   |
| Protocol           | 24  | Where the full trial protocol can be accessed, if available                                                                                                                                                    | 1 |
| Funding            | 25  | Sources of funding and other support (such as supply of drugs), role of funders                                                                                                                                | / |

---

# CENT abstract considerations

| Item               | Extension for N-of-1 designs                                                                                                      | Page in article |
|--------------------|-----------------------------------------------------------------------------------------------------------------------------------|-----------------|
| Title              | Identification of the study as an N-of-1 trial or series of N-of-1 trials in the title                                            | 1               |
| Authors            | Contact details for the corresponding author                                                                                      | 1               |
| Trial design       | Description of trial design, number of periods, and period duration                                                               | 4               |
| Methods            |                                                                                                                                   |                 |
| Participant(s)     | For individual trial, clinical condition under study<br>For series, eligibility criteria for participants                         | 5-7             |
| Interventions      | Interventions intended for each period                                                                                            | 7               |
| Objective          | Specific objective or hypothesis                                                                                                  | 4               |
| Outcome            | Clearly defined primary outcome for this report                                                                                   | 9-10            |
| Randomization      | How participants were allocated to interventions                                                                                  | 7               |
| Blinding (masking) | Whether participant(s), care givers, and those assessing the outcomes were blinded to group assignment                            | 8               |
| Results;           |                                                                                                                                   |                 |
| Numbers randomized | For individual N-of-1 trial, the number and sequence of periods completed<br>For series, number of individual trials carried out  | 4               |
| Recruitment        | Not applicable                                                                                                                    |                 |
| Numbers Analysed   | For individual N-of-1 report, number of periods analysed for each intervention<br>For series, the number of participants analysed | /               |
| Outcome            | For the primary outcome, a result for each group and the estimated effect size and its precision                                  | /               |
| Harms              | Important adverse events or side-effects                                                                                          | 10-12           |
| Conclusions        | General interpretation of the results                                                                                             | /               |
| Trial registration | Registration number and name of trial register, if applicable                                                                     | 1               |
| Funding            | Source of funding                                                                                                                 | /               |
