# Supplementary material for: Efficacy and Safety of Ginkgo Biloba Pills for Coronary Heart Disease with Impaired Glucose Regulation: Study Protocol for a Series of N-of-1 Randomized, Double-Blind, Placebo-Controlled Trials
Source: PubMed Central journal article supplement (PMC6204161; doi:10.1155/2018/7571629), 2018-10-14
Supplement: 7571629.f3.pdf [file 7571629.f3.pdf]

A single-case randomized controlled trial of  
Ginkgo Biloba pills in the treatment of  
coronary heart disease with impaired glucose  
regulation

# Case Report Form

Research Center: Xiyuan Hospital, China Academy of Chinese Medical Sciences

Subject initials:

Subject screening number:

Drug number:

Sponsor: Wanbangde Pharmaceutical Group Co., Ltd.

# Please read the following instructions carefully before filling out the form.

## Fill in the case report form

1. Fill in the CRF for all eligible cases.
2. Always use a black or blue-black pen to fill in the records. The writing should be legible and easy to read; you cannot use a ballpoint pen or pencil.
3. The CRF must be filled in accurately and clearly. It should not be altered at will. If the error is corrected, it should be marked with a horizontal line and the name of the modifier and the time of modification. Example: ~~99.6~~ 90.6<sup>LGW</sup>  
00 02 12
4. The patient's name is abbreviated in four digits. The two characters are filled in the first two abbreviations of the two-character pinyin; the three-character name is filled with the three-character abbreviation and the third-character second abbreviation; the four-character name is filled in the first abbreviation of each word. Example: Zhang Hong | Z | H | H | O; Li Shuming | L | S | M | I; Ouyang Xiaohui | O | Y | X | H.
5. Please fill in the numbers in the open spaces and fill in a number for each box. If the number of digits is not enough, please add zeros in the space before or after. For example: weight 58kg, filled in the space: 5 | 8 | 0 | kg; blood pressure 120/80 mgHg, filled in the space: 1 | 2 | 0 | / | 0 | 8 | 0 | mmHg
6. All selected items should be marked with × in the matching “□”, such as: ☒.
7. The record format of the date in the CRF is in the international ISO 8601 date format (yyyymmdd); all time records are in 24-hour format (for example, 15:00 in the afternoon is 15:00 instead of 03:00pm), and the recording in the middle of the night is 00:00 (Not 24:00) and as a new day.
8. Please answer all the questions in the CRF and don't leave a blank in the question. If “not done” fills in “ND”, “not applicable” fills in “NA”, “cannot get” fills in “UA”, “unknown” fills in “UK”, etc., and other cases are described in words. Pages without any records should also complete the header section and draw a diagonal slash on the page.
9. Do not change the format of the CRF. If there is no corresponding location in the discovery form or the information is not enough to record the information that the person wants to record, please record the information in the blank “attachment” on page 24 and sign it on the page.
10. At the appropriate location on each page of the form, ask the investigator to sign and complete the date of signature.
11. The adverse event record form should be filled in truthfully during the test. Record the time, severity, duration, measures taken, and outcomes of adverse events. If serious adverse events occur (including hospitalization, prolonged hospitalization, disability, work ability, life-threatening or death, congenital malformation, etc.), the ethics committee of the responsible unit must be notified immediately, contract research organization.

|                     |                           |                                |                                               |
|---------------------|---------------------------|--------------------------------|-----------------------------------------------|
| Baseline<br>-7~0Day | Drug number<br> _ _ _ _ _ | Patient initials<br> _ _ _ _ _ | Date of visit<br>201 _ Year _ _ Month _ _ Day |
|---------------------|---------------------------|--------------------------------|-----------------------------------------------|

**Informed consent**

|                                                        |
|--------------------------------------------------------|
| Informed consent date:  _ _ _ _ Year _ _ Month _ _ Day |
|--------------------------------------------------------|

**Demographic data**

|                                                                                                 |                                                                                                               |
|-------------------------------------------------------------------------------------------------|---------------------------------------------------------------------------------------------------------------|
| Age:  _ _ _ Year _ _ Month _ _ Day                                                              | Sex: <input type="checkbox"/> Male <input type="checkbox"/> Female                                            |
| Nationality: <input type="checkbox"/> 1 Han nationality <input type="checkbox"/> 2 Other: _____ | Nature of work: <input type="checkbox"/> 1 physical strength <input type="checkbox"/> 2 non-physical strength |
| Height:  _ _ _ _  cm                                                                            | Body Weight:  _ _ _ .  _ _  kg                                                                                |

**Diagnosis**

| Western medicine diagnosis                                                  |
|-----------------------------------------------------------------------------|
| Western medicine diagnosis: <input type="checkbox"/> Coronary heart disease |
| Course:  _ _ _ _ Month                                                      |

**History of treatment for coronary heart disease:** Has the patient been treated for the disease?

0 no 1 is → please fill in the details

| Drug name | Dosage | Start date | End date |
|-----------|--------|------------|----------|
|           |        |            |          |
|           |        |            |          |
|           |        |            |          |

**Past history:** Does the patient have other diseases and medications at the moment:

0 no 1 is → please fill in the details

| Diagnosis | Drug/Treatment name | Dosage | Start date                     | End date                       | Still using                |
|-----------|---------------------|--------|--------------------------------|--------------------------------|----------------------------|
|           |                     |        | _ _ _ _ Year _ _ Month _ _ Day | _ _ _ _ Year _ _ Month _ _ Day | <input type="checkbox"/> 1 |
|           |                     |        | _ _ _ _ Year _ _ Month _ _ Day | _ _ _ _ Year _ _ Month _ _ Day | <input type="checkbox"/> 1 |
|           |                     |        | _ _ _ _ Year _ _ Month _ _ Day | _ _ _ _ Year _ _ Month _ _ Day | <input type="checkbox"/> 1 |

**History of allergies:** Does the patient have a history of dication/food/environmental allergies?

0 no 1 is → please fill in the details \_\_\_\_\_

---

|                     |                           |                                |                                               |
|---------------------|---------------------------|--------------------------------|-----------------------------------------------|
| Baseline<br>-7~0Day | Drug number<br> _ _ _ _ _ | Patient initials<br> _ _ _ _ _ | Date of visit<br>201 _ Year _ _ Month _ _ Day |
|---------------------|---------------------------|--------------------------------|-----------------------------------------------|

### Vital signs

| Body temperature<br>(°C) | Breathe<br>(Times/minute) | Heart rate<br>(Times/minute) | Blood pressure (mmHg) |
|--------------------------|---------------------------|------------------------------|-----------------------|
| _ _ _ _ _                | _ _ _                     | _ _ _ _ _                    | _ _ _ _ / _ _ _ _     |

Seattle Angina Questionnaire(SAQ)

Score \*: |\_|\_|\_|\_|\_|

1. In the past 4 weeks, the following restrictions have been caused by chest pain, chest tightness and angina:

|                                                  | Severely restricted                   | Moderately restricted                 | Mildly restricted                     | Slightly restricted                   | Unrestricted                          | Limited for other reasons             |
|--------------------------------------------------|---------------------------------------|---------------------------------------|---------------------------------------|---------------------------------------|---------------------------------------|---------------------------------------|
| Dress yourself                                   | <input type="checkbox"/> <sub>1</sub> | <input type="checkbox"/> <sub>2</sub> | <input type="checkbox"/> <sub>3</sub> | <input type="checkbox"/> <sub>4</sub> | <input type="checkbox"/> <sub>5</sub> | <input type="checkbox"/> <sub>6</sub> |
| Indoor walk                                      | <input type="checkbox"/> <sub>1</sub> | <input type="checkbox"/> <sub>2</sub> | <input type="checkbox"/> <sub>3</sub> | <input type="checkbox"/> <sub>4</sub> | <input type="checkbox"/> <sub>5</sub> | <input type="checkbox"/> <sub>6</sub> |
| Take a shower                                    | <input type="checkbox"/> <sub>1</sub> | <input type="checkbox"/> <sub>2</sub> | <input type="checkbox"/> <sub>3</sub> | <input type="checkbox"/> <sub>4</sub> | <input type="checkbox"/> <sub>5</sub> | <input type="checkbox"/> <sub>6</sub> |
| Climbing or stairway<br>(three floors, non-stop) | <input type="checkbox"/> <sub>1</sub> | <input type="checkbox"/> <sub>2</sub> | <input type="checkbox"/> <sub>3</sub> | <input type="checkbox"/> <sub>4</sub> | <input type="checkbox"/> <sub>5</sub> | <input type="checkbox"/> <sub>6</sub> |
| Outdoor activities or pick up                    | <input type="checkbox"/> <sub>1</sub> | <input type="checkbox"/> <sub>2</sub> | <input type="checkbox"/> <sub>3</sub> | <input type="checkbox"/> <sub>4</sub> | <input type="checkbox"/> <sub>5</sub> | <input type="checkbox"/> <sub>6</sub> |
| Walk lightly (one kilometer)                     | <input type="checkbox"/> <sub>1</sub> | <input type="checkbox"/> <sub>2</sub> | <input type="checkbox"/> <sub>3</sub> | <input type="checkbox"/> <sub>4</sub> | <input type="checkbox"/> <sub>5</sub> | <input type="checkbox"/> <sub>6</sub> |
| Jogging (one kilometer)                          | <input type="checkbox"/> <sub>1</sub> | <input type="checkbox"/> <sub>2</sub> | <input type="checkbox"/> <sub>3</sub> | <input type="checkbox"/> <sub>4</sub> | <input type="checkbox"/> <sub>5</sub> | <input type="checkbox"/> <sub>6</sub> |
| Lift or move heavy objects                       | <input type="checkbox"/> <sub>1</sub> | <input type="checkbox"/> <sub>2</sub> | <input type="checkbox"/> <sub>3</sub> | <input type="checkbox"/> <sub>4</sub> | <input type="checkbox"/> <sub>5</sub> | <input type="checkbox"/> <sub>6</sub> |
| Strenuous exercise (such as swimming or playing) | <input type="checkbox"/> <sub>1</sub> | <input type="checkbox"/> <sub>2</sub> | <input type="checkbox"/> <sub>3</sub> | <input type="checkbox"/> <sub>4</sub> | <input type="checkbox"/> <sub>5</sub> | <input type="checkbox"/> <sub>6</sub> |

2. Compared with 4 weeks ago, when doing the maximum intensity of activity, chest pain, chest tightness and angina pectoris:

<sub>1</sub> obviously increase <sub>2</sub> Slight increase <sub>3</sub> the same <sub>4</sub> Minor reduction <sub>5</sub> obviously decrease

3. The average number of episodes of chest pain, chest tightness, and angina in the past 4 weeks:

<sub>1</sub> ≥four times/day <sub>2</sub> One-three times/day <sub>3</sub> ≥three times/week <sub>4</sub> one-two times/week

<sub>5</sub> < 1 time/week <sub>6</sub> no episode

4. The average number of nitro drugs (such as nitroglycerin) in chest pain, chest tightness, and angina pectoris over the past 4 weeks:

<sub>1</sub> ≥four times/day <sub>2</sub> One-three times/day <sub>3</sub> ≥three times/week <sub>4</sub> one-two times/week

<sub>5</sub> < 1 time/week <sub>6</sub> no episode

5. Due to chest pain, chest tightness and angina pectoris, follow the doctor's advice:

<sub>1</sub> Serious <sub>2</sub> Moderate <sub>3</sub> Minor <sub>4</sub> Very little <sub>5</sub> No <sub>6</sub> Doctor did not administer

6. Satisfaction with various measures for treating chest pain, chest tightness and angina:

<sub>1</sub> Dissatisfied <sub>2</sub> Most dissatisfied <sub>3</sub> Partially satisfied <sub>4</sub> Most satisfied <sub>5</sub> Highly satisfied

|                     |                           |                                |                                               |
|---------------------|---------------------------|--------------------------------|-----------------------------------------------|
| Baseline<br>-7~0Day | Drug number<br> _ _ _ _ _ | Patient initials<br> _ _ _ _ _ | Date of visit<br>201 _ Year _ _ Month _ _ Day |
|---------------------|---------------------------|--------------------------------|-----------------------------------------------|

7. Satisfaction with the doctor's explanation for chest pain, chest tightness and angina:

<sub>1</sub> Dissatisfied <sub>2</sub> Most dissatisfied <sub>3</sub> Partially satisfied <sub>4</sub> Most satisfied <sub>5</sub> Highly satisfied

8. Overall, satisfaction with the current treatment of chest pain, chest tightness and angina:

<sub>1</sub> Dissatisfied <sub>2</sub> Most dissatisfied <sub>3</sub> Partially satisfied <sub>4</sub> Most satisfied <sub>5</sub> Highly satisfied

9. In the past 4 weeks, chest pain, chest tightness and angina have affected the level of fun in life:

<sub>1</sub> Dissatisfied <sub>2</sub> Most dissatisfied <sub>3</sub> Partially satisfied <sub>4</sub> Most satisfied <sub>5</sub> Highly satisfied

10. If you have chest pain, chest tightness and angina in your future life, how would you feel?

<sub>1</sub> Dissatisfied <sub>2</sub> Most dissatisfied <sub>3</sub> Partially satisfied <sub>4</sub> Most satisfied <sub>5</sub> Highly satisfied

11. Concerns about heart attack and sudden death:

<sub>1</sub> Always worried <sub>2</sub> Frequently worried <sub>3</sub> Sometimes worried <sub>4</sub> Very little worried <sub>5</sub> Never worry

\* The Seattle Angina Scale is divided into 5 items and 19 items: Physical activity limitation (PL, question 1), angina stable state (AS, question 2), angina pectoris (AF, question 3-4), treatment satisfaction (TS), question 5-8), disease cognition (DP, question 9-11). After scoring the 19 items of the 5 major items one by one, each score is forwarded. The standard score = (actual score - the lowest score in this aspect) / (the highest score in this aspect - the lowest score in this aspect) \* 100, the higher the score, the better the quality of life and the functional state of the patient.

### Angina pectoris symptom score

Score \*: |\_|\_|\_|\_|\_|

|                          |                                          |                                                                                                                                                                                                                                                                                              |                                                                                                                                                                                                                                                                             |                                                                                                                                                                                                                                                                                                                 |
|--------------------------|------------------------------------------|----------------------------------------------------------------------------------------------------------------------------------------------------------------------------------------------------------------------------------------------------------------------------------------------|-----------------------------------------------------------------------------------------------------------------------------------------------------------------------------------------------------------------------------------------------------------------------------|-----------------------------------------------------------------------------------------------------------------------------------------------------------------------------------------------------------------------------------------------------------------------------------------------------------------|
| Number of angina attacks | <input type="checkbox"/> <sub>0</sub> No | <input type="checkbox"/> <sub>2</sub> 2-6 episodes per week                                                                                                                                                                                                                                  | <input type="checkbox"/> <sub>4</sub> 1-3 times a day                                                                                                                                                                                                                       | <input type="checkbox"/> <sub>6</sub> more than 4 episodes per day                                                                                                                                                                                                                                              |
| Angina duration          | <input type="checkbox"/> <sub>0</sub> No | <input type="checkbox"/> <sub>2</sub> Each time the pain lasts less than or equal to 5 minutes                                                                                                                                                                                               | <input type="checkbox"/> <sub>4</sub> Each time the pain lasts longer than 5 minutes and less than 10                                                                                                                                                                       | <input type="checkbox"/> <sub>6</sub> Each time the pain lasts for 10 minutes or more                                                                                                                                                                                                                           |
| Angina pain level        | <input type="checkbox"/> <sub>0</sub> No | <input type="checkbox"/> <sub>2</sub> Physical activity that is heavier than daily activities causes angina and daily activities are asymptomatic. Activities that can cause angina, such as trotting on the ground, fast or holding heavy objects on the third floor, up steep slopes, etc. | <input type="checkbox"/> <sub>4</sub> Daily physical activity causes angina and daily activities are slightly limited. Activities that can cause angina, such as walking 3-4 stations (3-4 miles) at normal speed under normal conditions, on the third floor, uphill, etc. | <input type="checkbox"/> <sub>6</sub> Lighter physical activity than daily activities causes angina and daily activities are significantly limited. Activities that can cause angina, such as walking 1-2 stations (1-2 miles) at normal speed under normal conditions, on the second floor, gentle slope, etc. |
| Nitroglycerin dosage     | <input type="checkbox"/> <sub>0</sub> No | <input type="checkbox"/> <sub>2</sub> 1-4 tablets per week                                                                                                                                                                                                                                   | <input type="checkbox"/> <sub>4</sub> 5-9 tablets per week                                                                                                                                                                                                                  | <input type="checkbox"/> <sub>6</sub> Take more than 10 tablets a week                                                                                                                                                                                                                                          |

|                     |                           |                                |                                               |
|---------------------|---------------------------|--------------------------------|-----------------------------------------------|
| Baseline<br>-7~0Day | Drug number<br> _ _ _ _ _ | Patient initials<br> _ _ _ _ _ | Date of visit<br>201 _ Year _ _ Month _ _ Day |
|---------------------|---------------------------|--------------------------------|-----------------------------------------------|

### Laboratory inspection

| Indicator                        | Measured Value | Unit                                             | Clinical significance *  |                          |                          |                          | Anomalous cause explanation |
|----------------------------------|----------------|--------------------------------------------------|--------------------------|--------------------------|--------------------------|--------------------------|-----------------------------|
|                                  |                |                                                  | 1                        | 2                        | 3                        | 4                        |                             |
| <b>Blood routine</b>             |                | <b>Report date:</b> 201 _ Year _ _ Month _ _ Day |                          |                          |                          |                          |                             |
| HGB                              |                | g/L                                              | <input type="checkbox"/> | <input type="checkbox"/> | <input type="checkbox"/> | <input type="checkbox"/> |                             |
| RBC                              |                | $\times 10^{12}/L$                               | <input type="checkbox"/> | <input type="checkbox"/> | <input type="checkbox"/> | <input type="checkbox"/> |                             |
| WBC                              |                | $\times 10^9/L$                                  | <input type="checkbox"/> | <input type="checkbox"/> | <input type="checkbox"/> | <input type="checkbox"/> |                             |
| PLT                              |                | $\times 10^9/L$                                  | <input type="checkbox"/> | <input type="checkbox"/> | <input type="checkbox"/> | <input type="checkbox"/> |                             |
| <b>Urine routine</b>             |                | <b>Report date:</b> 201 _ Year _ _ Month _ _ Day |                          |                          |                          |                          |                             |
| Urine PH                         |                |                                                  | <input type="checkbox"/> | <input type="checkbox"/> | <input type="checkbox"/> | <input type="checkbox"/> |                             |
| PRO                              |                | —                                                | <input type="checkbox"/> | <input type="checkbox"/> | <input type="checkbox"/> | <input type="checkbox"/> |                             |
| ERY                              |                | /HPF                                             | <input type="checkbox"/> | <input type="checkbox"/> | <input type="checkbox"/> | <input type="checkbox"/> |                             |
| White blood cells<br>(LEU)       |                | /HPF                                             | <input type="checkbox"/> | <input type="checkbox"/> | <input type="checkbox"/> | <input type="checkbox"/> |                             |
| <b>Liver and kidney function</b> |                | <b>Report date:</b> 201 _ Year _ _ Month _ _ Day |                          |                          |                          |                          |                             |
| ALT                              |                | U/L                                              | <input type="checkbox"/> | <input type="checkbox"/> | <input type="checkbox"/> | <input type="checkbox"/> |                             |
| AST                              |                | U/L                                              | <input type="checkbox"/> | <input type="checkbox"/> | <input type="checkbox"/> | <input type="checkbox"/> |                             |
| ALP                              |                | U/L                                              | <input type="checkbox"/> | <input type="checkbox"/> | <input type="checkbox"/> | <input type="checkbox"/> |                             |
| TBIL                             |                | $\mu\text{mol}/L$                                | <input type="checkbox"/> | <input type="checkbox"/> | <input type="checkbox"/> | <input type="checkbox"/> |                             |
| $\gamma$ -GT                     |                | U/L                                              | <input type="checkbox"/> | <input type="checkbox"/> | <input type="checkbox"/> | <input type="checkbox"/> |                             |
| TBA                              |                | $\mu\text{mol}/L$                                | <input type="checkbox"/> | <input type="checkbox"/> | <input type="checkbox"/> | <input type="checkbox"/> |                             |
| BUN                              |                | mmol/L                                           | <input type="checkbox"/> | <input type="checkbox"/> | <input type="checkbox"/> | <input type="checkbox"/> |                             |
| Cr                               |                | $\mu\text{mol}/L$                                | <input type="checkbox"/> | <input type="checkbox"/> | <input type="checkbox"/> | <input type="checkbox"/> |                             |
| <b>blood sugar</b>               |                | <b>Report date:</b> 201 _ Year _ _ Month _ _ Day |                          |                          |                          |                          |                             |
| FPG                              |                | mmol/L                                           | <input type="checkbox"/> | <input type="checkbox"/> | <input type="checkbox"/> | <input type="checkbox"/> |                             |
| 2hPG                             |                | mmol/L                                           | <input type="checkbox"/> | <input type="checkbox"/> | <input type="checkbox"/> | <input type="checkbox"/> |                             |
| HbA1c                            |                | mg/dl                                            | <input type="checkbox"/> | <input type="checkbox"/> | <input type="checkbox"/> | <input type="checkbox"/> |                             |
| Fasting insulin                  |                | $\mu\text{U}/\text{ml}$                          | <input type="checkbox"/> | <input type="checkbox"/> | <input type="checkbox"/> | <input type="checkbox"/> |                             |

|                     |                           |                                |                                               |
|---------------------|---------------------------|--------------------------------|-----------------------------------------------|
| Baseline<br>-7~0Day | Drug number<br> _ _ _ _ _ | Patient initials<br> _ _ _ _ _ | Date of visit<br>201 _ Year _ _ Month _ _ Day |
|---------------------|---------------------------|--------------------------------|-----------------------------------------------|

|                           |  |                                                  |                                                                                                                                                                                                                                                                                                            |  |
|---------------------------|--|--------------------------------------------------|------------------------------------------------------------------------------------------------------------------------------------------------------------------------------------------------------------------------------------------------------------------------------------------------------------|--|
| <b>Blood lipid</b>        |  | <b>Report date:</b> 201 _ Year _ _ Month _ _ Day |                                                                                                                                                                                                                                                                                                            |  |
| HDL-C                     |  | mmol/L                                           | <input type="checkbox"/> <sub>1</sub> <input type="checkbox"/> <sub>2</sub> <input type="checkbox"/> <sub>3</sub> <input type="checkbox"/> <sub>4</sub>                                                                                                                                                    |  |
| LDL-C                     |  | mmol/L                                           | <input type="checkbox"/> <sub>1</sub> <input type="checkbox"/> <sub>2</sub> <input type="checkbox"/> <sub>3</sub> <input type="checkbox"/> <sub>4</sub>                                                                                                                                                    |  |
| TG                        |  | mmol/L                                           | <input type="checkbox"/> <sub>1</sub> <input type="checkbox"/> <sub>2</sub> <input type="checkbox"/> <sub>3</sub> <input type="checkbox"/> <sub>4</sub>                                                                                                                                                    |  |
| CH                        |  | mmol/L                                           | <input type="checkbox"/> <sub>1</sub> <input type="checkbox"/> <sub>2</sub> <input type="checkbox"/> <sub>3</sub> <input type="checkbox"/> <sub>4</sub>                                                                                                                                                    |  |
| <b>C-reactive protein</b> |  | <b>Report date:</b> 201 _ Year _ _ Month _ _ Day |                                                                                                                                                                                                                                                                                                            |  |
| CRP                       |  | mg/L                                             | <input type="checkbox"/> <sub>1</sub> <input type="checkbox"/> <sub>2</sub> <input type="checkbox"/> <sub>3</sub> <input type="checkbox"/> <sub>4</sub>                                                                                                                                                    |  |
| <b>Electrocardiogram</b>  |  | <b>Report date:</b> 201 _ Year _ _ Month _ _ Day |                                                                                                                                                                                                                                                                                                            |  |
| ECG                       |  | —                                                | <input type="checkbox"/> <sub>1</sub> <input type="checkbox"/> <sub>2</sub> <input type="checkbox"/> <sub>3</sub> <input type="checkbox"/> <sub>4</sub>                                                                                                                                                    |  |
| <b>Urine pregnancy</b>    |  | <b>Report date:</b> 201 _ Year _ _ Month _ _ Day |                                                                                                                                                                                                                                                                                                            |  |
| Urine pregnancy           |  | —                                                | <input type="checkbox"/> <sub>1</sub> Not applicable<br>(male, post-sterilization<br>or menopause for more<br>than 1 year women)<br><input type="checkbox"/> <sub>2</sub> Negative<br><input type="checkbox"/> <sub>3</sub> Positive<br>(Can't enter the test)<br><input type="checkbox"/> <sub>4</sub> 未查 |  |

\* Clinical significance judgment: (1) normal (2) abnormal but no clinical significance (3) abnormal and clinical significance (4) not investigated.

|                     |                           |                                |                                               |
|---------------------|---------------------------|--------------------------------|-----------------------------------------------|
| Baseline<br>-7~0Day | Drug number<br> _ _ _ _ _ | Patient initials<br> _ _ _ _ _ | Date of visit<br>201 _ Year _ _ Month _ _ Day |
|---------------------|---------------------------|--------------------------------|-----------------------------------------------|

**Inclusion criteria: The following options are all “Yes” to be selected.**

|                                                                                                                                                                                                                                                                                                                                                                                              |                                           |                                          |
|----------------------------------------------------------------------------------------------------------------------------------------------------------------------------------------------------------------------------------------------------------------------------------------------------------------------------------------------------------------------------------------------|-------------------------------------------|------------------------------------------|
| 1. Meet the diagnostic criteria for coronary heart disease Western medicine (any one can be):<br>a) have a clear history of old myocardial infarction, or have a history of PCI, or have a history of bypass (at least 3 months);<br>b) Coronary angiography or coronary CTA results suggest that at least one coronary artery is narrowed and the degree of lumen stenosis is $\geq 50\%$ ; | <input type="checkbox"/> <sub>1</sub> Yes | <input type="checkbox"/> <sub>0</sub> No |
| 2. In line with the criteria for stable angina, and the number of episodes of angina pectoris $\geq 2$ times per week;                                                                                                                                                                                                                                                                       | <input type="checkbox"/> <sub>1</sub> Yes | <input type="checkbox"/> <sub>0</sub> No |
| 3. Comply with the 25 diagnostic criteria of blood stasis syndrome of coronary heart disease (CHD) ;                                                                                                                                                                                                                                                                                         | <input type="checkbox"/> <sub>1</sub> Yes | <input type="checkbox"/> <sub>0</sub> No |
| 4. Comply with the 2016 Diabetes Association (ADA) published criteria for impaired diagnosis of glucose regulation;                                                                                                                                                                                                                                                                          | <input type="checkbox"/> <sub>1</sub> Yes | <input type="checkbox"/> <sub>0</sub> NO |
| 5. Aged between 18 and 75 years, no gender;                                                                                                                                                                                                                                                                                                                                                  | <input type="checkbox"/> <sub>1</sub> Yes | <input type="checkbox"/> <sub>0</sub> No |
| 6. Participants voluntarily participated in this study, signed informed consent and had good compliance.                                                                                                                                                                                                                                                                                     | <input type="checkbox"/> <sub>1</sub> Yes | <input type="checkbox"/> <sub>0</sub> No |



|                     |                           |                                |                                               |
|---------------------|---------------------------|--------------------------------|-----------------------------------------------|
| Baseline<br>-7~0Day | Drug number<br> _ _ _ _ _ | Patient initials<br> _ _ _ _ _ | Date of visit<br>201 _ Year _ _ Month _ _ Day |
|---------------------|---------------------------|--------------------------------|-----------------------------------------------|

**Exclusion criteria: The following options are all “No” to be selected.**

|                                                                                                                                                                                                                                                                                                                                                            |                              |                             |
|------------------------------------------------------------------------------------------------------------------------------------------------------------------------------------------------------------------------------------------------------------------------------------------------------------------------------------------------------------|------------------------------|-----------------------------|
| 1. With congenital or 5 rheumatic heart disease or severe cardiopulmonary insufficiency (grade 3 and 4 of 6 cardiac function), or uncontrolled severe arrhythmias (including ventricular tachycardia, supraventricular tachycardia), or not controlled hypertension (systolic blood pressure $\geq 160$ mmHg or diastolic blood pressure $\geq 100$ mmHg); | <input type="checkbox"/> Yes | <input type="checkbox"/> No |
| 2. With cerebrovascular disease, or with severe liver and kidney dysfunction, or with 10 endocrine, urinary, blood system and other serious primary diseases;                                                                                                                                                                                              | <input type="checkbox"/> Yes | <input type="checkbox"/> No |
| 3. Within 4 weeks, there was history of major organ surgery such as head, chest or abdomen or bleeding tendency;                                                                                                                                                                                                                                           | <input type="checkbox"/> Yes | <input type="checkbox"/> No |
| 4. Those who have taken hypoglycaemic agents or glucocorticoids, thiazide diuretics and other drugs that affect blood sugar levels within 3 months;                                                                                                                                                                                                        | <input type="checkbox"/> Yes | <input type="checkbox"/> No |
| 5. People with diseases affecting blood glucose metabolism, such as thyroid glands and adrenal diseases, or those with previous history of the aforementioned diseases;                                                                                                                                                                                    | <input type="checkbox"/> Yes | <input type="checkbox"/> No |
| 6. Allergies or persons allergic to known ingredients of the study drug;                                                                                                                                                                                                                                                                                   | <input type="checkbox"/> Yes | <input type="checkbox"/> No |
| 7. Pregnancy and lactation women or those with a pregnancy plan;                                                                                                                                                                                                                                                                                           | <input type="checkbox"/> Yes | <input type="checkbox"/> No |
| 8. Subjects who participated in other clinical trials in the last 3 months;                                                                                                                                                                                                                                                                                | <input type="checkbox"/> Yes | <input type="checkbox"/> No |
| 9. Researchers consider that subjects should not participate in clinical trials.                                                                                                                                                                                                                                                                           | <input type="checkbox"/> Yes | <input type="checkbox"/> No |

**Screening results: Does the patient enter the trial?**

|                                                                                                                                                            |
|------------------------------------------------------------------------------------------------------------------------------------------------------------|
| <input type="checkbox"/> Yes → Drug number:  _ _ _ _ _ <br>Drug delivery time: 201 _ Year _ _ Month _ _ Day<br>Number of medicines: 900 pills (10 bottles) |
| <input type="checkbox"/> No → Please indicate the reason and fill in the screening selection form: _____                                                   |

**Researcher's signature:** \_\_\_\_\_ **Date:** 201|\_|Year|\_|\_|Month|\_|\_|Day

|                      |                         |                              |                                               |
|----------------------|-------------------------|------------------------------|-----------------------------------------------|
| Visit1<br>8Week±4Day | Drug number<br> _ _ _ _ | Patient initials<br> _ _ _ _ | Date of visit<br>201 _ Year _ _ Month _ _ Day |
|----------------------|-------------------------|------------------------------|-----------------------------------------------|

**Vital signs**

| Body temperature (°C) | Breathe (Times/minute) | Heart rate (Times/minute) | Blood pressure (mmHg) |
|-----------------------|------------------------|---------------------------|-----------------------|
| _ _ _ _               | _ _ _                  | _ _ _ _                   | _ _ _ / _ _ _ _       |

Seattle Angina Questionnaire(SAQ)

Score \*: |\_|\_|\_|\_|\_|

1. In the past 4 weeks, the following restrictions have been caused by chest pain, chest tightness and angina:

|                                                  | Severely restricted        | Moderately restricted      | Mildly restricted          | Slightly restricted        | Unrestricted               | Limited for other reasons  |
|--------------------------------------------------|----------------------------|----------------------------|----------------------------|----------------------------|----------------------------|----------------------------|
| Dress yourself                                   | <input type="checkbox"/> 1 | <input type="checkbox"/> 2 | <input type="checkbox"/> 3 | <input type="checkbox"/> 4 | <input type="checkbox"/> 5 | <input type="checkbox"/> 6 |
| Indoor walk                                      | <input type="checkbox"/> 1 | <input type="checkbox"/> 2 | <input type="checkbox"/> 3 | <input type="checkbox"/> 4 | <input type="checkbox"/> 5 | <input type="checkbox"/> 6 |
| Take a shower                                    | <input type="checkbox"/> 1 | <input type="checkbox"/> 2 | <input type="checkbox"/> 3 | <input type="checkbox"/> 4 | <input type="checkbox"/> 5 | <input type="checkbox"/> 6 |
| Climbing or stairway (three floors, non-stop)    | <input type="checkbox"/> 1 | <input type="checkbox"/> 2 | <input type="checkbox"/> 3 | <input type="checkbox"/> 4 | <input type="checkbox"/> 5 | <input type="checkbox"/> 6 |
| Outdoor activities or pick up                    | <input type="checkbox"/> 1 | <input type="checkbox"/> 2 | <input type="checkbox"/> 3 | <input type="checkbox"/> 4 | <input type="checkbox"/> 5 | <input type="checkbox"/> 6 |
| Walk lightly (one kilometer)                     | <input type="checkbox"/> 1 | <input type="checkbox"/> 2 | <input type="checkbox"/> 3 | <input type="checkbox"/> 4 | <input type="checkbox"/> 5 | <input type="checkbox"/> 6 |
| Jogging (one kilometer)                          | <input type="checkbox"/> 1 | <input type="checkbox"/> 2 | <input type="checkbox"/> 3 | <input type="checkbox"/> 4 | <input type="checkbox"/> 5 | <input type="checkbox"/> 6 |
| Lift or move heavy objects                       | <input type="checkbox"/> 1 | <input type="checkbox"/> 2 | <input type="checkbox"/> 3 | <input type="checkbox"/> 4 | <input type="checkbox"/> 5 | <input type="checkbox"/> 6 |
| Strenuous exercise (such as swimming or playing) | <input type="checkbox"/> 1 | <input type="checkbox"/> 2 | <input type="checkbox"/> 3 | <input type="checkbox"/> 4 | <input type="checkbox"/> 5 | <input type="checkbox"/> 6 |

2. Compared with 4 weeks ago, when doing the maximum intensity of activity, chest pain, chest tightness and angina pectoris:

1 obviously increase 2 Slight increase 3 the same 4 Minor reduction 5 obviously decrease

3. The average number of episodes of chest pain, chest tightness, and angina in the past 4 weeks:

1 ≥four times/day 2 One-three times/day 3 ≥three times/week 4 one-two times/week

5 < 1 time/week 6 no episode

4. The average number of nitro drugs (such as nitroglycerin) in chest pain, chest tightness, and angina pectoris over the past 4 weeks:

1 ≥four times/day 2 One-three times/day 3 ≥three times/week 4 one-two times/week

5 < 1 time/week 6 no episode

5. Due to chest pain, chest tightness and angina pectoris, follow the doctor's advice:

1 Serious 2 Moderate 3 Minor 4 Very little 5 No 6 Doctor did not administer

|                      |                         |                              |                                               |
|----------------------|-------------------------|------------------------------|-----------------------------------------------|
| Visit1<br>8Week±4Day | Drug number<br> _ _ _ _ | Patient initials<br> _ _ _ _ | Date of visit<br>201 _ Year _ _ Month _ _ Day |
|----------------------|-------------------------|------------------------------|-----------------------------------------------|

6. Satisfaction with various measures for treating chest pain, chest tightness and angina:

<sub>1</sub> Dissatisfied <sub>2</sub> Most dissatisfied <sub>3</sub> Partially satisfied <sub>4</sub> Most satisfied <sub>5</sub> Highly satisfied

7. Satisfaction with the doctor's explanation for chest pain, chest tightness and angina:

<sub>1</sub> Dissatisfied <sub>2</sub> Most dissatisfied <sub>3</sub> Partially satisfied <sub>4</sub> Most satisfied <sub>5</sub> Highly satisfied

8. Overall, satisfaction with the current treatment of chest pain, chest tightness and angina:

<sub>1</sub> Dissatisfied <sub>2</sub> Most dissatisfied <sub>3</sub> Partially satisfied <sub>4</sub> Most satisfied <sub>5</sub> Highly satisfied

9. In the past 4 weeks, chest pain, chest tightness and angina have affected the level of fun in life:

<sub>1</sub> Dissatisfied <sub>2</sub> Most dissatisfied <sub>3</sub> Partially satisfied <sub>4</sub> Most satisfied <sub>5</sub> Highly satisfied

10. If you have chest pain, chest tightness and angina in your future life, how would you feel?

<sub>1</sub> Dissatisfied <sub>2</sub> Most dissatisfied <sub>3</sub> Partially satisfied <sub>4</sub> Most satisfied <sub>5</sub> Highly satisfied

11. Concerns about heart attack and sudden death:

<sub>1</sub> Always worried <sub>2</sub> Frequently worried <sub>3</sub> Sometimes worried <sub>4</sub> Very little worried <sub>5</sub> Never worry

\* The Seattle Angina Scale is divided into 5 items and 19 items: Physical activity limitation (PL, question 1), angina stable state (AS, question 2), angina pectoris (AF, question 3-4), treatment satisfaction (TS), question 5-8), disease cognition (DP, question 9-11). After scoring the 19 items of the 5 major items one by one, each score is forwarded. The standard score = (actual score - the lowest score in this aspect) / (the highest score in this aspect - the lowest score in this aspect) ✖ 100, the higher the score, the better the quality of life and the functional state of the patient.

### Angina pectoris symptom score

Score \*: |\_|\_|\_|\_|

|                          |                                          |                                                                                                                                                                                                                                                                                              |                                                                                                                                                                                                                                                                             |                                                                                                                                                                                                                                                                                                                 |
|--------------------------|------------------------------------------|----------------------------------------------------------------------------------------------------------------------------------------------------------------------------------------------------------------------------------------------------------------------------------------------|-----------------------------------------------------------------------------------------------------------------------------------------------------------------------------------------------------------------------------------------------------------------------------|-----------------------------------------------------------------------------------------------------------------------------------------------------------------------------------------------------------------------------------------------------------------------------------------------------------------|
| Number of angina attacks | <input type="checkbox"/> <sub>0</sub> No | <input type="checkbox"/> <sub>2</sub> 2-6 episodes per week                                                                                                                                                                                                                                  | <input type="checkbox"/> <sub>4</sub> 1-3 times a day                                                                                                                                                                                                                       | <input type="checkbox"/> <sub>6</sub> more than 4 episodes per day                                                                                                                                                                                                                                              |
| Angina duration          | <input type="checkbox"/> <sub>0</sub> No | <input type="checkbox"/> <sub>2</sub> Each time the pain lasts less than or equal to 5 minutes                                                                                                                                                                                               | <input type="checkbox"/> <sub>4</sub> Each time the pain lasts longer than 5 minutes and less than 10                                                                                                                                                                       | <input type="checkbox"/> <sub>6</sub> Each time the pain lasts for 10 minutes or more                                                                                                                                                                                                                           |
| Angina pain level        | <input type="checkbox"/> <sub>0</sub> No | <input type="checkbox"/> <sub>2</sub> Physical activity that is heavier than daily activities causes angina and daily activities are asymptomatic. Activities that can cause angina, such as trotting on the ground, fast or holding heavy objects on the third floor, up steep slopes, etc. | <input type="checkbox"/> <sub>4</sub> Daily physical activity causes angina and daily activities are slightly limited. Activities that can cause angina, such as walking 3-4 stations (3-4 miles) at normal speed under normal conditions, on the third floor, uphill, etc. | <input type="checkbox"/> <sub>6</sub> Lighter physical activity than daily activities causes angina and daily activities are significantly limited. Activities that can cause angina, such as walking 1-2 stations (1-2 miles) at normal speed under normal conditions, on the second floor, gentle slope, etc. |
| Nitroglycerin dosage     | <input type="checkbox"/> <sub>0</sub> No | <input type="checkbox"/> <sub>2</sub> 1-4 tablets per week                                                                                                                                                                                                                                   | <input type="checkbox"/> <sub>4</sub> 5-9 tablets per week                                                                                                                                                                                                                  | <input type="checkbox"/> <sub>6</sub> Take more than 10 tablets a week                                                                                                                                                                                                                                          |

|                      |                         |                              |                                               |
|----------------------|-------------------------|------------------------------|-----------------------------------------------|
| Visit1<br>8Week±4Day | Drug number<br> _ _ _ _ | Patient initials<br> _ _ _ _ | Date of visit<br>201 _ Year _ _ Month _ _ Day |
|----------------------|-------------------------|------------------------------|-----------------------------------------------|

### Laboratory inspection

| Indicator                        | Measured Value | Unit                                             | Clinical significance *                                                                                                                                 |   |   |   | Anomalous cause explanation |
|----------------------------------|----------------|--------------------------------------------------|---------------------------------------------------------------------------------------------------------------------------------------------------------|---|---|---|-----------------------------|
|                                  |                |                                                  | 1                                                                                                                                                       | 2 | 3 | 4 |                             |
| <b>Blood routine</b>             |                | <b>Report date:</b> 201 _ Year _ _ Month _ _ Day |                                                                                                                                                         |   |   |   |                             |
| HGB                              |                | g/L                                              | <input type="checkbox"/> <sub>1</sub> <input type="checkbox"/> <sub>2</sub> <input type="checkbox"/> <sub>3</sub> <input type="checkbox"/> <sub>4</sub> |   |   |   |                             |
| RBC                              |                | ×10 <sup>12</sup> /L                             | <input type="checkbox"/> <sub>1</sub> <input type="checkbox"/> <sub>2</sub> <input type="checkbox"/> <sub>3</sub> <input type="checkbox"/> <sub>4</sub> |   |   |   |                             |
| WBC                              |                | ×10 <sup>9</sup> /L                              | <input type="checkbox"/> <sub>1</sub> <input type="checkbox"/> <sub>2</sub> <input type="checkbox"/> <sub>3</sub> <input type="checkbox"/> <sub>4</sub> |   |   |   |                             |
| PLT                              |                | ×10 <sup>9</sup> /L                              | <input type="checkbox"/> <sub>1</sub> <input type="checkbox"/> <sub>2</sub> <input type="checkbox"/> <sub>3</sub> <input type="checkbox"/> <sub>4</sub> |   |   |   |                             |
| <b>Urine routine</b>             |                | <b>Report date:</b> 201 _ Year _ _ Month _ _ Day |                                                                                                                                                         |   |   |   |                             |
| Urine PH                         |                |                                                  | <input type="checkbox"/> <sub>1</sub> <input type="checkbox"/> <sub>2</sub> <input type="checkbox"/> <sub>3</sub> <input type="checkbox"/> <sub>4</sub> |   |   |   |                             |
| PRO                              |                | —                                                | <input type="checkbox"/> <sub>1</sub> <input type="checkbox"/> <sub>2</sub> <input type="checkbox"/> <sub>3</sub> <input type="checkbox"/> <sub>4</sub> |   |   |   |                             |
| ERY                              |                | /HPF                                             | <input type="checkbox"/> <sub>1</sub> <input type="checkbox"/> <sub>2</sub> <input type="checkbox"/> <sub>3</sub> <input type="checkbox"/> <sub>4</sub> |   |   |   |                             |
| White blood cells (LEU)          |                | /HPF                                             | <input type="checkbox"/> <sub>1</sub> <input type="checkbox"/> <sub>2</sub> <input type="checkbox"/> <sub>3</sub> <input type="checkbox"/> <sub>4</sub> |   |   |   |                             |
| <b>Liver and kidney function</b> |                | <b>Report date:</b> 201 _ Year _ _ Month _ _ Day |                                                                                                                                                         |   |   |   |                             |
| ALT                              |                | U/L                                              | <input type="checkbox"/> <sub>1</sub> <input type="checkbox"/> <sub>2</sub> <input type="checkbox"/> <sub>3</sub> <input type="checkbox"/> <sub>4</sub> |   |   |   |                             |
| AST                              |                | U/L                                              | <input type="checkbox"/> <sub>1</sub> <input type="checkbox"/> <sub>2</sub> <input type="checkbox"/> <sub>3</sub> <input type="checkbox"/> <sub>4</sub> |   |   |   |                             |
| ALP                              |                | U/L                                              | <input type="checkbox"/> <sub>1</sub> <input type="checkbox"/> <sub>2</sub> <input type="checkbox"/> <sub>3</sub> <input type="checkbox"/> <sub>4</sub> |   |   |   |                             |
| TBIL                             |                | μmol/L                                           | <input type="checkbox"/> <sub>1</sub> <input type="checkbox"/> <sub>2</sub> <input type="checkbox"/> <sub>3</sub> <input type="checkbox"/> <sub>4</sub> |   |   |   |                             |
| γ-GT                             |                | U/L                                              | <input type="checkbox"/> <sub>1</sub> <input type="checkbox"/> <sub>2</sub> <input type="checkbox"/> <sub>3</sub> <input type="checkbox"/> <sub>4</sub> |   |   |   |                             |
| TBA                              |                | μmol/L                                           | <input type="checkbox"/> <sub>1</sub> <input type="checkbox"/> <sub>2</sub> <input type="checkbox"/> <sub>3</sub> <input type="checkbox"/> <sub>4</sub> |   |   |   |                             |
| BUN                              |                | mmol/L                                           | <input type="checkbox"/> <sub>1</sub> <input type="checkbox"/> <sub>2</sub> <input type="checkbox"/> <sub>3</sub> <input type="checkbox"/> <sub>4</sub> |   |   |   |                             |
| Cr                               |                | μmol/L                                           | <input type="checkbox"/> <sub>1</sub> <input type="checkbox"/> <sub>2</sub> <input type="checkbox"/> <sub>3</sub> <input type="checkbox"/> <sub>4</sub> |   |   |   |                             |
| <b>blood sugar</b>               |                | <b>Report date:</b> 201 _ Year _ _ Month _ _ Day |                                                                                                                                                         |   |   |   |                             |
| FPG                              |                | mmol/L                                           | <input type="checkbox"/> <sub>1</sub> <input type="checkbox"/> <sub>2</sub> <input type="checkbox"/> <sub>3</sub> <input type="checkbox"/> <sub>4</sub> |   |   |   |                             |
| 2hPG                             |                | mmol/L                                           | <input type="checkbox"/> <sub>1</sub> <input type="checkbox"/> <sub>2</sub> <input type="checkbox"/> <sub>3</sub> <input type="checkbox"/> <sub>4</sub> |   |   |   |                             |
| HbA1c                            |                | mg/dl                                            | <input type="checkbox"/> <sub>1</sub> <input type="checkbox"/> <sub>2</sub> <input type="checkbox"/> <sub>3</sub> <input type="checkbox"/> <sub>4</sub> |   |   |   |                             |
| Fasting insulin                  |                | μU/ml                                            | <input type="checkbox"/> <sub>1</sub> <input type="checkbox"/> <sub>2</sub> <input type="checkbox"/> <sub>3</sub> <input type="checkbox"/> <sub>4</sub> |   |   |   |                             |

|                      |                         |                              |                                               |
|----------------------|-------------------------|------------------------------|-----------------------------------------------|
| Visit1<br>8Week±4Day | Drug number<br> _ _ _ _ | Patient initials<br> _ _ _ _ | Date of visit<br>201 _ Year _ _ Month _ _ Day |
|----------------------|-------------------------|------------------------------|-----------------------------------------------|

|                           |  |                                                  |                                                                                                             |  |
|---------------------------|--|--------------------------------------------------|-------------------------------------------------------------------------------------------------------------|--|
| <b>Blood lipid</b>        |  | <b>Report date:</b> 201 _ Year _ _ Month _ _ Day |                                                                                                             |  |
| HDL-C                     |  | mmol/L                                           | <input type="checkbox"/> 1 <input type="checkbox"/> 2 <input type="checkbox"/> 3 <input type="checkbox"/> 4 |  |
| LDL-C                     |  | mmol/L                                           | <input type="checkbox"/> 1 <input type="checkbox"/> 2 <input type="checkbox"/> 3 <input type="checkbox"/> 4 |  |
| TG                        |  | mmol/L                                           | <input type="checkbox"/> 1 <input type="checkbox"/> 2 <input type="checkbox"/> 3 <input type="checkbox"/> 4 |  |
| CH                        |  | mmol/L                                           | <input type="checkbox"/> 1 <input type="checkbox"/> 2 <input type="checkbox"/> 3 <input type="checkbox"/> 4 |  |
| <b>C-reactive protein</b> |  | <b>Report date:</b> 201 _ Year _ _ Month _ _ Day |                                                                                                             |  |
| CRP                       |  | mg/L                                             | <input type="checkbox"/> 1 <input type="checkbox"/> 2 <input type="checkbox"/> 3 <input type="checkbox"/> 4 |  |
| <b>Electrocardiogram</b>  |  | <b>Report date:</b> 201 _ Year _ _ Month _ _ Day |                                                                                                             |  |
| ECG                       |  | —                                                | <input type="checkbox"/> 1 <input type="checkbox"/> 2 <input type="checkbox"/> 3 <input type="checkbox"/> 4 |  |

\* Clinical significance judgment: (1) normal (2) abnormal but no clinical significance (3) abnormal and clinical significance (4) not investigated.

**Is the test drug returned?**

|                                                                                                                                                                                                                                            |
|--------------------------------------------------------------------------------------------------------------------------------------------------------------------------------------------------------------------------------------------|
| <input type="checkbox"/> 0 No → Unreturned reason: <input type="checkbox"/> 2 Take all <input type="checkbox"/> 3 Lost <input type="checkbox"/> 4 Other _____<br><input type="checkbox"/> 1 Yes → Ginkgo biloba drop pills  _ _ _ _  pills |
|--------------------------------------------------------------------------------------------------------------------------------------------------------------------------------------------------------------------------------------------|

**Is there a combined medication?**

|                                                                                                                                     |
|-------------------------------------------------------------------------------------------------------------------------------------|
| <input type="checkbox"/> 0 No<br><input type="checkbox"/> 1 Yes → Please fill out the “Combined Medication Record Form” on page 47. |
|-------------------------------------------------------------------------------------------------------------------------------------|

**Are there any adverse events?**

|                                                                                                                                         |
|-----------------------------------------------------------------------------------------------------------------------------------------|
| <input type="checkbox"/> 0 No<br><input type="checkbox"/> 1 Yes → Please fill out the “Adverse Event Record Form” on page 48 in detail. |
|-----------------------------------------------------------------------------------------------------------------------------------------|

**Is there an unscheduled laboratory check?**

|                                                                                                                                              |
|----------------------------------------------------------------------------------------------------------------------------------------------|
| <input type="checkbox"/> 0 No<br><input type="checkbox"/> 1 Yes → Record the results to “Unplanned Laboratory Inspection Results” on page 49 |
|----------------------------------------------------------------------------------------------------------------------------------------------|

**Researcher's signature:** \_\_\_\_\_ **Date:** 201|\_|Year|\_|\_|Month|\_|\_|Day

|                       |                           |                                |                                               |
|-----------------------|---------------------------|--------------------------------|-----------------------------------------------|
| Visit2<br>10Week±4Day | Drug number<br> _ _ _ _ _ | Patient initials<br> _ _ _ _ _ | Date of visit<br>201 _ Year _ _ Month _ _ Day |
|-----------------------|---------------------------|--------------------------------|-----------------------------------------------|

Seattle Angina Questionnaire(SAQ)

Score \*: |\_|\_|\_|\_|\_|

1. In the past 4 weeks, the following restrictions have been caused by chest pain, chest tightness and angina:

|                                                  | Severely restricted                   | Moderately restricted                 | Mildly restricted                     | Slightly restricted                   | Unrestricted                          | Limited for other reasons             |
|--------------------------------------------------|---------------------------------------|---------------------------------------|---------------------------------------|---------------------------------------|---------------------------------------|---------------------------------------|
| Dress yourself                                   | <input type="checkbox"/> <sub>1</sub> | <input type="checkbox"/> <sub>2</sub> | <input type="checkbox"/> <sub>3</sub> | <input type="checkbox"/> <sub>4</sub> | <input type="checkbox"/> <sub>5</sub> | <input type="checkbox"/> <sub>6</sub> |
| Indoor walk                                      | <input type="checkbox"/> <sub>1</sub> | <input type="checkbox"/> <sub>2</sub> | <input type="checkbox"/> <sub>3</sub> | <input type="checkbox"/> <sub>4</sub> | <input type="checkbox"/> <sub>5</sub> | <input type="checkbox"/> <sub>6</sub> |
| Take a shower                                    | <input type="checkbox"/> <sub>1</sub> | <input type="checkbox"/> <sub>2</sub> | <input type="checkbox"/> <sub>3</sub> | <input type="checkbox"/> <sub>4</sub> | <input type="checkbox"/> <sub>5</sub> | <input type="checkbox"/> <sub>6</sub> |
| Climbing or stairway<br>(three floors, non-stop) | <input type="checkbox"/> <sub>1</sub> | <input type="checkbox"/> <sub>2</sub> | <input type="checkbox"/> <sub>3</sub> | <input type="checkbox"/> <sub>4</sub> | <input type="checkbox"/> <sub>5</sub> | <input type="checkbox"/> <sub>6</sub> |
| Outdoor activities or pick up                    | <input type="checkbox"/> <sub>1</sub> | <input type="checkbox"/> <sub>2</sub> | <input type="checkbox"/> <sub>3</sub> | <input type="checkbox"/> <sub>4</sub> | <input type="checkbox"/> <sub>5</sub> | <input type="checkbox"/> <sub>6</sub> |
| Walk lightly (one kilometer)                     | <input type="checkbox"/> <sub>1</sub> | <input type="checkbox"/> <sub>2</sub> | <input type="checkbox"/> <sub>3</sub> | <input type="checkbox"/> <sub>4</sub> | <input type="checkbox"/> <sub>5</sub> | <input type="checkbox"/> <sub>6</sub> |
| Jogging (one kilometer)                          | <input type="checkbox"/> <sub>1</sub> | <input type="checkbox"/> <sub>2</sub> | <input type="checkbox"/> <sub>3</sub> | <input type="checkbox"/> <sub>4</sub> | <input type="checkbox"/> <sub>5</sub> | <input type="checkbox"/> <sub>6</sub> |
| Lift or move heavy objects                       | <input type="checkbox"/> <sub>1</sub> | <input type="checkbox"/> <sub>2</sub> | <input type="checkbox"/> <sub>3</sub> | <input type="checkbox"/> <sub>4</sub> | <input type="checkbox"/> <sub>5</sub> | <input type="checkbox"/> <sub>6</sub> |
| Strenuous exercise (such as swimming or playing) | <input type="checkbox"/> <sub>1</sub> | <input type="checkbox"/> <sub>2</sub> | <input type="checkbox"/> <sub>3</sub> | <input type="checkbox"/> <sub>4</sub> | <input type="checkbox"/> <sub>5</sub> | <input type="checkbox"/> <sub>6</sub> |

2. Compared with 4 weeks ago, when doing the maximum intensity of activity, chest pain, chest tightness and angina pectoris:

<sub>1</sub> obviously increase <sub>2</sub> Slight increase <sub>3</sub> the same <sub>4</sub> Minor reduction <sub>5</sub> obviously decrease

3. The average number of episodes of chest pain, chest tightness, and angina in the past 4 weeks:

<sub>1</sub> ≥four times/day <sub>2</sub> One-three times/day <sub>3</sub> ≥three times/week <sub>4</sub> one-two times/week

<sub>5</sub> < 1 time/week <sub>6</sub> no episode

4. The average number of nitro drugs (such as nitroglycerin) in chest pain, chest tightness, and angina pectoris over the past 4 weeks:

<sub>1</sub> ≥four times/day <sub>2</sub> One-three times/day <sub>3</sub> ≥three times/week <sub>4</sub> one-two times/week

<sub>5</sub> < 1 time/week <sub>6</sub> no episode

5. Due to chest pain, chest tightness and angina pectoris, follow the doctor's advice:

<sub>1</sub> Serious <sub>2</sub> Moderate <sub>3</sub> Minor <sub>4</sub> Very little <sub>5</sub> No <sub>6</sub> Doctor did not administer

6. Satisfaction with various measures for treating chest pain, chest tightness and angina:

<sub>1</sub> Dissatisfied <sub>2</sub> Most dissatisfied <sub>3</sub> Partially satisfied <sub>4</sub> Most satisfied <sub>5</sub> Highly satisfied

7. Satisfaction with the doctor's explanation for chest pain, chest tightness and angina:

<sub>1</sub> Dissatisfied <sub>2</sub> Most dissatisfied <sub>3</sub> Partially satisfied <sub>4</sub> Most satisfied <sub>5</sub> Highly satisfied

8. Overall, satisfaction with the current treatment of chest pain, chest tightness and angina:

<sub>1</sub> Dissatisfied <sub>2</sub> Most dissatisfied <sub>3</sub> Partially satisfied <sub>4</sub> Most satisfied <sub>5</sub> Highly satisfied

|                       |                           |                                |                                               |
|-----------------------|---------------------------|--------------------------------|-----------------------------------------------|
| Visit2<br>10Week±4Day | Drug number<br> _ _ _ _ _ | Patient initials<br> _ _ _ _ _ | Date of visit<br>201 _ Year _ _ Month _ _ Day |
|-----------------------|---------------------------|--------------------------------|-----------------------------------------------|

9. In the past 4 weeks, chest pain, chest tightness and angina have affected the level of fun in life:

<sub>1</sub> Dissatisfied <sub>2</sub> Most dissatisfied <sub>3</sub> Partially satisfied <sub>4</sub> Most satisfied <sub>5</sub> Highly satisfied

10. If you have chest pain, chest tightness and angina in your future life, how would you feel?

<sub>1</sub> Dissatisfied <sub>2</sub> Most dissatisfied <sub>3</sub> Partially satisfied <sub>4</sub> Most satisfied <sub>5</sub> Highly satisfied

11. Concerns about heart attack and sudden death:

<sub>1</sub> Always worried <sub>2</sub> Frequently worried <sub>3</sub> Sometimes worried <sub>4</sub> Very little worried <sub>5</sub> Never worry

\* The Seattle Angina Scale is divided into 5 items and 19 items: Physical activity limitation (PL, question 1), angina stable state (AS, question 2), angina pectoris (AF, question 3-4), treatment satisfaction (TS), question 5-8), disease cognition (DP, question 9-11). After scoring the 19 items of the 5 major items one by one, each score is forwarded. The standard score = (actual score - the lowest score in this aspect) / (the highest score in this aspect - the lowest score in this aspect) ✖100, the higher the score, the better the quality of life and the functional state of the patient.

### Angina pectoris symptom score

Score \*: |\_|\_|\_|\_|\_|

|                          |                                          |                                                                                                                                                                                                                                                                                              |                                                                                                                                                                                                                                                                             |                                                                                                                                                                                                                                                                                                                 |
|--------------------------|------------------------------------------|----------------------------------------------------------------------------------------------------------------------------------------------------------------------------------------------------------------------------------------------------------------------------------------------|-----------------------------------------------------------------------------------------------------------------------------------------------------------------------------------------------------------------------------------------------------------------------------|-----------------------------------------------------------------------------------------------------------------------------------------------------------------------------------------------------------------------------------------------------------------------------------------------------------------|
| Number of angina attacks | <input type="checkbox"/> <sub>0</sub> No | <input type="checkbox"/> <sub>2</sub> 2-6 episodes per week                                                                                                                                                                                                                                  | <input type="checkbox"/> <sub>4</sub> 1-3 times a day                                                                                                                                                                                                                       | <input type="checkbox"/> <sub>6</sub> more than 4 episodes per day                                                                                                                                                                                                                                              |
| Angina duration          | <input type="checkbox"/> <sub>0</sub> No | <input type="checkbox"/> <sub>2</sub> Each time the pain lasts less than or equal to 5 minutes                                                                                                                                                                                               | <input type="checkbox"/> <sub>4</sub> Each time the pain lasts longer than 5 minutes and less than 10                                                                                                                                                                       | <input type="checkbox"/> <sub>6</sub> Each time the pain lasts for 10 minutes or more                                                                                                                                                                                                                           |
| Angina pain level        | <input type="checkbox"/> <sub>0</sub> No | <input type="checkbox"/> <sub>2</sub> Physical activity that is heavier than daily activities causes angina and daily activities are asymptomatic. Activities that can cause angina, such as trotting on the ground, fast or holding heavy objects on the third floor, up steep slopes, etc. | <input type="checkbox"/> <sub>4</sub> Daily physical activity causes angina and daily activities are slightly limited. Activities that can cause angina, such as walking 3-4 stations (3-4 miles) at normal speed under normal conditions, on the third floor, uphill, etc. | <input type="checkbox"/> <sub>6</sub> Lighter physical activity than daily activities causes angina and daily activities are significantly limited. Activities that can cause angina, such as walking 1-2 stations (1-2 miles) at normal speed under normal conditions, on the second floor, gentle slope, etc. |
| Nitroglycerin dosage     | <input type="checkbox"/> <sub>0</sub> No | <input type="checkbox"/> <sub>2</sub> 1-4 tablets per week                                                                                                                                                                                                                                   | <input type="checkbox"/> <sub>4</sub> 5-9 tablets per week                                                                                                                                                                                                                  | <input type="checkbox"/> <sub>6</sub> Take more than 10 tablets a week                                                                                                                                                                                                                                          |

|                       |                           |                                |                                               |
|-----------------------|---------------------------|--------------------------------|-----------------------------------------------|
| Visit2<br>10Week±4Day | Drug number<br> _ _ _ _ _ | Patient initials<br> _ _ _ _ _ | Date of visit<br>201 _ Year _ _ Month _ _ Day |
|-----------------------|---------------------------|--------------------------------|-----------------------------------------------|

### Laboratory inspection

| Indicator                 | Measured Value | Unit                                             | Clinical significance *                                                                                                                                 |   |   |   | Anomalous cause explanation |
|---------------------------|----------------|--------------------------------------------------|---------------------------------------------------------------------------------------------------------------------------------------------------------|---|---|---|-----------------------------|
|                           |                |                                                  | 1                                                                                                                                                       | 2 | 3 | 4 |                             |
| <b>Blood sugar</b>        |                | <b>Report date:</b> 201 _ Year _ _ Month _ _ Day |                                                                                                                                                         |   |   |   |                             |
| FPG                       |                | mmol/L                                           | <input type="checkbox"/> <sub>1</sub> <input type="checkbox"/> <sub>2</sub> <input type="checkbox"/> <sub>3</sub> <input type="checkbox"/> <sub>4</sub> |   |   |   |                             |
| 2hPG                      |                | mmol/L                                           | <input type="checkbox"/> <sub>1</sub> <input type="checkbox"/> <sub>2</sub> <input type="checkbox"/> <sub>3</sub> <input type="checkbox"/> <sub>4</sub> |   |   |   |                             |
| HbA1c                     |                | mg/dl                                            | <input type="checkbox"/> <sub>1</sub> <input type="checkbox"/> <sub>2</sub> <input type="checkbox"/> <sub>3</sub> <input type="checkbox"/> <sub>4</sub> |   |   |   |                             |
| Fasting insulin           |                | μU/ml                                            | <input type="checkbox"/> <sub>1</sub> <input type="checkbox"/> <sub>2</sub> <input type="checkbox"/> <sub>3</sub> <input type="checkbox"/> <sub>4</sub> |   |   |   |                             |
| <b>Blood lipid</b>        |                | <b>Report date:</b> 201 _ Year _ _ Month _ _ Day |                                                                                                                                                         |   |   |   |                             |
| HDL-C                     |                | mmol/L                                           | <input type="checkbox"/> <sub>1</sub> <input type="checkbox"/> <sub>2</sub> <input type="checkbox"/> <sub>3</sub> <input type="checkbox"/> <sub>4</sub> |   |   |   |                             |
| LDL-C                     |                | mmol/L                                           | <input type="checkbox"/> <sub>1</sub> <input type="checkbox"/> <sub>2</sub> <input type="checkbox"/> <sub>3</sub> <input type="checkbox"/> <sub>4</sub> |   |   |   |                             |
| TG                        |                | mmol/L                                           | <input type="checkbox"/> <sub>1</sub> <input type="checkbox"/> <sub>2</sub> <input type="checkbox"/> <sub>3</sub> <input type="checkbox"/> <sub>4</sub> |   |   |   |                             |
| CH                        |                | mmol/L                                           | <input type="checkbox"/> <sub>1</sub> <input type="checkbox"/> <sub>2</sub> <input type="checkbox"/> <sub>3</sub> <input type="checkbox"/> <sub>4</sub> |   |   |   |                             |
| <b>C-reactive protein</b> |                | <b>Report date:</b> 201 _ Year _ _ Month _ _ Day |                                                                                                                                                         |   |   |   |                             |
| CRP                       |                | mg/L                                             | <input type="checkbox"/> <sub>1</sub> <input type="checkbox"/> <sub>2</sub> <input type="checkbox"/> <sub>3</sub> <input type="checkbox"/> <sub>4</sub> |   |   |   |                             |

\* Clinical significance judgment: (1) normal (2) abnormal but no clinical significance (3) abnormal and clinical significance (4) not investigated.

### Is there a combined medication?

- <sub>0</sub>No  
<sub>1</sub>Yes→Please fill out the “Combined Medication Record Form” on page 47.

### Are there any adverse events?

- <sub>0</sub>No  
<sub>1</sub>Yes→Please fill out the “Adverse Event Record Form” on page 48 in detail.

### Is there an unscheduled laboratory check?

- <sub>0</sub>No  
<sub>1</sub>Yes→Record the results to “Unplanned Laboratory Inspection Results” on page 49

**Release of test drug:** Ginkgo biloba drop pills 900 pills (10 bottles)

**Researcher's signature:** \_\_\_\_\_ **Date:** 201|\_|Year|\_|\_|Month|\_|\_|Day



|                       |                         |                              |                                               |
|-----------------------|-------------------------|------------------------------|-----------------------------------------------|
| Visit3<br>18Week±4day | Drug number<br> _ _ _ _ | Patient initials<br> _ _ _ _ | Date of visit<br>201 _ Year _ _ Month _ _ Day |
|-----------------------|-------------------------|------------------------------|-----------------------------------------------|

Seattle Angina Questionnaire(SAQ)

Score \*: |\_|\_|\_|\_|

1. In the past 4 weeks, the following restrictions have been caused by chest pain, chest tightness and angina:

|                                                  | Severely restricted                   | Moderately restricted                 | Mildly restricted                     | Slightly restricted                   | Unrestricted                          | Limited for other reasons             |
|--------------------------------------------------|---------------------------------------|---------------------------------------|---------------------------------------|---------------------------------------|---------------------------------------|---------------------------------------|
| Dress yourself                                   | <input type="checkbox"/> <sub>1</sub> | <input type="checkbox"/> <sub>2</sub> | <input type="checkbox"/> <sub>3</sub> | <input type="checkbox"/> <sub>4</sub> | <input type="checkbox"/> <sub>5</sub> | <input type="checkbox"/> <sub>6</sub> |
| Indoor walk                                      | <input type="checkbox"/> <sub>1</sub> | <input type="checkbox"/> <sub>2</sub> | <input type="checkbox"/> <sub>3</sub> | <input type="checkbox"/> <sub>4</sub> | <input type="checkbox"/> <sub>5</sub> | <input type="checkbox"/> <sub>6</sub> |
| Take a shower                                    | <input type="checkbox"/> <sub>1</sub> | <input type="checkbox"/> <sub>2</sub> | <input type="checkbox"/> <sub>3</sub> | <input type="checkbox"/> <sub>4</sub> | <input type="checkbox"/> <sub>5</sub> | <input type="checkbox"/> <sub>6</sub> |
| Climbing or stairway<br>(three floors, non-stop) | <input type="checkbox"/> <sub>1</sub> | <input type="checkbox"/> <sub>2</sub> | <input type="checkbox"/> <sub>3</sub> | <input type="checkbox"/> <sub>4</sub> | <input type="checkbox"/> <sub>5</sub> | <input type="checkbox"/> <sub>6</sub> |
| Outdoor activities or pick up                    | <input type="checkbox"/> <sub>1</sub> | <input type="checkbox"/> <sub>2</sub> | <input type="checkbox"/> <sub>3</sub> | <input type="checkbox"/> <sub>4</sub> | <input type="checkbox"/> <sub>5</sub> | <input type="checkbox"/> <sub>6</sub> |
| Walk lightly (one kilometer)                     | <input type="checkbox"/> <sub>1</sub> | <input type="checkbox"/> <sub>2</sub> | <input type="checkbox"/> <sub>3</sub> | <input type="checkbox"/> <sub>4</sub> | <input type="checkbox"/> <sub>5</sub> | <input type="checkbox"/> <sub>6</sub> |
| Jogging (one kilometer)                          | <input type="checkbox"/> <sub>1</sub> | <input type="checkbox"/> <sub>2</sub> | <input type="checkbox"/> <sub>3</sub> | <input type="checkbox"/> <sub>4</sub> | <input type="checkbox"/> <sub>5</sub> | <input type="checkbox"/> <sub>6</sub> |
| Lift or move heavy objects                       | <input type="checkbox"/> <sub>1</sub> | <input type="checkbox"/> <sub>2</sub> | <input type="checkbox"/> <sub>3</sub> | <input type="checkbox"/> <sub>4</sub> | <input type="checkbox"/> <sub>5</sub> | <input type="checkbox"/> <sub>6</sub> |
| Strenuous exercise (such as swimming or playing) | <input type="checkbox"/> <sub>1</sub> | <input type="checkbox"/> <sub>2</sub> | <input type="checkbox"/> <sub>3</sub> | <input type="checkbox"/> <sub>4</sub> | <input type="checkbox"/> <sub>5</sub> | <input type="checkbox"/> <sub>6</sub> |

2. Compared with 4 weeks ago, when doing the maximum intensity of activity, chest pain, chest tightness and angina pectoris:

<sub>1</sub> obviously increase <sub>2</sub> Slight increase <sub>3</sub> the same <sub>4</sub> Minor reduction <sub>5</sub> obviously decrease

3. The average number of episodes of chest pain, chest tightness, and angina in the past 4 weeks:

<sub>1</sub> ≥four times/day <sub>2</sub> One-three times/day <sub>3</sub> ≥three times/week <sub>4</sub> one-two times/week

<sub>5</sub> < 1 time/week <sub>6</sub> no episode

4. The average number of nitro drugs (such as nitroglycerin) in chest pain, chest tightness, and angina pectoris over the past 4 weeks:

<sub>1</sub> ≥four times/day <sub>2</sub> One-three times/day <sub>3</sub> ≥three times/week <sub>4</sub> one-two times/week

<sub>5</sub> < 1 time/week <sub>6</sub> no episode

5. Due to chest pain, chest tightness and angina pectoris, follow the doctor's advice:

<sub>1</sub> Serious <sub>2</sub> Moderate <sub>3</sub> Minor <sub>4</sub> Very little <sub>5</sub> No <sub>6</sub> Doctor did not administer

6. Satisfaction with various measures for treating chest pain, chest tightness and angina:

<sub>1</sub> Dissatisfied <sub>2</sub> Most dissatisfied <sub>3</sub> Partially satisfied <sub>4</sub> Most satisfied <sub>5</sub> Highly satisfied

7. Satisfaction with the doctor's explanation for chest pain, chest tightness and angina:

<sub>1</sub> Dissatisfied <sub>2</sub> Most dissatisfied <sub>3</sub> Partially satisfied <sub>4</sub> Most satisfied <sub>5</sub> Highly satisfied

8. Overall, satisfaction with the current treatment of chest pain, chest tightness and angina:

<sub>1</sub> Dissatisfied <sub>2</sub> Most dissatisfied <sub>3</sub> Partially satisfied <sub>4</sub> Most satisfied <sub>5</sub> Highly satisfied

|                       |                         |                              |                                               |
|-----------------------|-------------------------|------------------------------|-----------------------------------------------|
| Visit3<br>18Week±4day | Drug number<br> _ _ _ _ | Patient initials<br> _ _ _ _ | Date of visit<br>201 _ Year _ _ Month _ _ Day |
|-----------------------|-------------------------|------------------------------|-----------------------------------------------|

9. In the past 4 weeks, chest pain, chest tightness and angina have affected the level of fun in life:

<sub>1</sub> Dissatisfied <sub>2</sub> Most dissatisfied <sub>3</sub> Partially satisfied <sub>4</sub> Most satisfied <sub>5</sub> Highly satisfied

10. If you have chest pain, chest tightness and angina in your future life, how would you feel?

<sub>1</sub> Dissatisfied <sub>2</sub> Most dissatisfied <sub>3</sub> Partially satisfied <sub>4</sub> Most satisfied <sub>5</sub> Highly satisfied

11. Concerns about heart attack and sudden death:

<sub>1</sub> Always worried <sub>2</sub> Frequently worried <sub>3</sub> Sometimes worried <sub>4</sub> Very little worried <sub>5</sub> Never worry

\* The Seattle Angina Scale is divided into 5 items and 19 items: Physical activity limitation (PL, question 1), angina stable state (AS, question 2), angina pectoris (AF, question 3-4), treatment satisfaction (TS), question 5-8), disease cognition (DP, question 9-11). After scoring the 19 items of the 5 major items one by one, each score is forwarded. The standard score = (actual score - the lowest score in this aspect) / (the highest score in this aspect - the lowest score in this aspect) ✖100, the higher the score, the better the quality of life and the functional state of the patient.

### Angina pectoris symptom score

Score \*: |\_|\_|\_|\_|

|                          |                                          |                                                                                                                                                                                                                                                                                              |                                                                                                                                                                                                                                                                             |                                                                                                                                                                                                                                                                                                                 |
|--------------------------|------------------------------------------|----------------------------------------------------------------------------------------------------------------------------------------------------------------------------------------------------------------------------------------------------------------------------------------------|-----------------------------------------------------------------------------------------------------------------------------------------------------------------------------------------------------------------------------------------------------------------------------|-----------------------------------------------------------------------------------------------------------------------------------------------------------------------------------------------------------------------------------------------------------------------------------------------------------------|
| Number of angina attacks | <input type="checkbox"/> <sub>0</sub> No | <input type="checkbox"/> <sub>2</sub> 2-6 episodes per week                                                                                                                                                                                                                                  | <input type="checkbox"/> <sub>4</sub> 1-3 times a day                                                                                                                                                                                                                       | <input type="checkbox"/> <sub>6</sub> more than 4 episodes per day                                                                                                                                                                                                                                              |
| Angina duration          | <input type="checkbox"/> <sub>0</sub> No | <input type="checkbox"/> <sub>2</sub> Each time the pain lasts less than or equal to 5 minutes                                                                                                                                                                                               | <input type="checkbox"/> <sub>4</sub> Each time the pain lasts longer than 5 minutes and less than 10                                                                                                                                                                       | <input type="checkbox"/> <sub>6</sub> Each time the pain lasts for 10 minutes or more                                                                                                                                                                                                                           |
| Angina pain level        | <input type="checkbox"/> <sub>0</sub> No | <input type="checkbox"/> <sub>2</sub> Physical activity that is heavier than daily activities causes angina and daily activities are asymptomatic. Activities that can cause angina, such as trotting on the ground, fast or holding heavy objects on the third floor, up steep slopes, etc. | <input type="checkbox"/> <sub>4</sub> Daily physical activity causes angina and daily activities are slightly limited. Activities that can cause angina, such as walking 3-4 stations (3-4 miles) at normal speed under normal conditions, on the third floor, uphill, etc. | <input type="checkbox"/> <sub>6</sub> Lighter physical activity than daily activities causes angina and daily activities are significantly limited. Activities that can cause angina, such as walking 1-2 stations (1-2 miles) at normal speed under normal conditions, on the second floor, gentle slope, etc. |
| Nitroglycerin dosage     | <input type="checkbox"/> <sub>0</sub> No | <input type="checkbox"/> <sub>2</sub> 1-4 tablets per week                                                                                                                                                                                                                                   | <input type="checkbox"/> <sub>4</sub> 5-9 tablets per week                                                                                                                                                                                                                  | <input type="checkbox"/> <sub>6</sub> Take more than 10 tablets a week                                                                                                                                                                                                                                          |

|                       |                         |                              |                                               |
|-----------------------|-------------------------|------------------------------|-----------------------------------------------|
| Visit3<br>18Week±4day | Drug number<br> _ _ _ _ | Patient initials<br> _ _ _ _ | Date of visit<br>201 _ Year _ _ Month _ _ Day |
|-----------------------|-------------------------|------------------------------|-----------------------------------------------|

### Laboratory inspection

| Indicator                 | Measured Value | Unit                                             | Clinical significance *                                                                                                                                 |   |   |   | Anomalous cause explanation |
|---------------------------|----------------|--------------------------------------------------|---------------------------------------------------------------------------------------------------------------------------------------------------------|---|---|---|-----------------------------|
|                           |                |                                                  | 1                                                                                                                                                       | 2 | 3 | 4 |                             |
| <b>Blood sugar</b>        |                | <b>Report date:</b> 201 _ Year _ _ Month _ _ Day |                                                                                                                                                         |   |   |   |                             |
| FPG                       |                | mmol/L                                           | <input type="checkbox"/> <sub>1</sub> <input type="checkbox"/> <sub>2</sub> <input type="checkbox"/> <sub>3</sub> <input type="checkbox"/> <sub>4</sub> |   |   |   |                             |
| 2hPG                      |                | mmol/L                                           | <input type="checkbox"/> <sub>1</sub> <input type="checkbox"/> <sub>2</sub> <input type="checkbox"/> <sub>3</sub> <input type="checkbox"/> <sub>4</sub> |   |   |   |                             |
| HbA1c                     |                | mg/dl                                            | <input type="checkbox"/> <sub>1</sub> <input type="checkbox"/> <sub>2</sub> <input type="checkbox"/> <sub>3</sub> <input type="checkbox"/> <sub>4</sub> |   |   |   |                             |
| Fasting insulin           |                | μU/ml                                            | <input type="checkbox"/> <sub>1</sub> <input type="checkbox"/> <sub>2</sub> <input type="checkbox"/> <sub>3</sub> <input type="checkbox"/> <sub>4</sub> |   |   |   |                             |
| <b>Blood lipid</b>        |                | <b>Report date:</b> 201 _ Year _ _ Month _ _ Day |                                                                                                                                                         |   |   |   |                             |
| HDL-C                     |                | mmol/L                                           | <input type="checkbox"/> <sub>1</sub> <input type="checkbox"/> <sub>2</sub> <input type="checkbox"/> <sub>3</sub> <input type="checkbox"/> <sub>4</sub> |   |   |   |                             |
| LDL-C                     |                | mmol/L                                           | <input type="checkbox"/> <sub>1</sub> <input type="checkbox"/> <sub>2</sub> <input type="checkbox"/> <sub>3</sub> <input type="checkbox"/> <sub>4</sub> |   |   |   |                             |
| TG                        |                | mmol/L                                           | <input type="checkbox"/> <sub>1</sub> <input type="checkbox"/> <sub>2</sub> <input type="checkbox"/> <sub>3</sub> <input type="checkbox"/> <sub>4</sub> |   |   |   |                             |
| CH                        |                | mmol/L                                           | <input type="checkbox"/> <sub>1</sub> <input type="checkbox"/> <sub>2</sub> <input type="checkbox"/> <sub>3</sub> <input type="checkbox"/> <sub>4</sub> |   |   |   |                             |
| <b>C-reactive protein</b> |                | <b>Report date:</b> 201 _ Year _ _ Month _ _ Day |                                                                                                                                                         |   |   |   |                             |
| CRP                       |                | mg/L                                             | <input type="checkbox"/> <sub>1</sub> <input type="checkbox"/> <sub>2</sub> <input type="checkbox"/> <sub>3</sub> <input type="checkbox"/> <sub>4</sub> |   |   |   |                             |

\* Clinical significance judgment: (1) normal (2) abnormal but no clinical significance (3) abnormal and clinical significance (4) not investigated.

|                       |                         |                              |                                               |
|-----------------------|-------------------------|------------------------------|-----------------------------------------------|
| Visit3<br>18Week±4day | Drug number<br> _ _ _ _ | Patient initials<br> _ _ _ _ | Date of visit<br>201 _ Year _ _ Month _ _ Day |
|-----------------------|-------------------------|------------------------------|-----------------------------------------------|

**Is the test drug returned?**

<sub>0</sub>No→Unreturned reason: <sub>2</sub> Take all <sub>3</sub> Lost <sub>4</sub> Other\_\_\_\_\_

<sub>1</sub>Yes→ Ginkgo biloba drop pills |\_|\_|\_|\_| pills

**Is there a combined medication?**

<sub>0</sub>No

<sub>1</sub>Yes→Please fill out the “Combined Medication Record Form” on page 47.

**Are there any adverse events?**

<sub>0</sub>No

<sub>1</sub>Yes→Please fill out the “Adverse Event Record Form” on page 48 in detail.

**Is there an unscheduled laboratory check?**

<sub>0</sub>No

<sub>1</sub>Yes→Record the results to “Unplanned Laboratory Inspection Results” on page 49

**Researcher's signature:** \_\_\_\_\_ **Date:** 201|\_|Year|\_|\_|Month|\_|\_|Day

|                       |                           |                                |                                               |
|-----------------------|---------------------------|--------------------------------|-----------------------------------------------|
| Visit4<br>20Week±4Day | Drug number<br> _ _ _ _ _ | Patient initials<br> _ _ _ _ _ | Date of visit<br>201 _ Year _ _ Month _ _ Day |
|-----------------------|---------------------------|--------------------------------|-----------------------------------------------|

Seattle Angina Questionnaire(SAQ)

Score \*: |\_|\_|\_|\_|\_|

1. In the past 4 weeks, the following restrictions have been caused by chest pain, chest tightness and angina:

|                                                  | Severely restricted                   | Moderately restricted                 | Mildly restricted                     | Slightly restricted                   | Unrestricted                          | Limited for other reasons             |
|--------------------------------------------------|---------------------------------------|---------------------------------------|---------------------------------------|---------------------------------------|---------------------------------------|---------------------------------------|
| Dress yourself                                   | <input type="checkbox"/> <sub>1</sub> | <input type="checkbox"/> <sub>2</sub> | <input type="checkbox"/> <sub>3</sub> | <input type="checkbox"/> <sub>4</sub> | <input type="checkbox"/> <sub>5</sub> | <input type="checkbox"/> <sub>6</sub> |
| Indoor walk                                      | <input type="checkbox"/> <sub>1</sub> | <input type="checkbox"/> <sub>2</sub> | <input type="checkbox"/> <sub>3</sub> | <input type="checkbox"/> <sub>4</sub> | <input type="checkbox"/> <sub>5</sub> | <input type="checkbox"/> <sub>6</sub> |
| Take a shower                                    | <input type="checkbox"/> <sub>1</sub> | <input type="checkbox"/> <sub>2</sub> | <input type="checkbox"/> <sub>3</sub> | <input type="checkbox"/> <sub>4</sub> | <input type="checkbox"/> <sub>5</sub> | <input type="checkbox"/> <sub>6</sub> |
| Climbing or stairway<br>(three floors, non-stop) | <input type="checkbox"/> <sub>1</sub> | <input type="checkbox"/> <sub>2</sub> | <input type="checkbox"/> <sub>3</sub> | <input type="checkbox"/> <sub>4</sub> | <input type="checkbox"/> <sub>5</sub> | <input type="checkbox"/> <sub>6</sub> |
| Outdoor activities or pick up                    | <input type="checkbox"/> <sub>1</sub> | <input type="checkbox"/> <sub>2</sub> | <input type="checkbox"/> <sub>3</sub> | <input type="checkbox"/> <sub>4</sub> | <input type="checkbox"/> <sub>5</sub> | <input type="checkbox"/> <sub>6</sub> |
| Walk lightly (one kilometer)                     | <input type="checkbox"/> <sub>1</sub> | <input type="checkbox"/> <sub>2</sub> | <input type="checkbox"/> <sub>3</sub> | <input type="checkbox"/> <sub>4</sub> | <input type="checkbox"/> <sub>5</sub> | <input type="checkbox"/> <sub>6</sub> |
| Jogging (one kilometer)                          | <input type="checkbox"/> <sub>1</sub> | <input type="checkbox"/> <sub>2</sub> | <input type="checkbox"/> <sub>3</sub> | <input type="checkbox"/> <sub>4</sub> | <input type="checkbox"/> <sub>5</sub> | <input type="checkbox"/> <sub>6</sub> |
| Lift or move heavy objects                       | <input type="checkbox"/> <sub>1</sub> | <input type="checkbox"/> <sub>2</sub> | <input type="checkbox"/> <sub>3</sub> | <input type="checkbox"/> <sub>4</sub> | <input type="checkbox"/> <sub>5</sub> | <input type="checkbox"/> <sub>6</sub> |
| Strenuous exercise (such as swimming or playing) | <input type="checkbox"/> <sub>1</sub> | <input type="checkbox"/> <sub>2</sub> | <input type="checkbox"/> <sub>3</sub> | <input type="checkbox"/> <sub>4</sub> | <input type="checkbox"/> <sub>5</sub> | <input type="checkbox"/> <sub>6</sub> |

2. Compared with 4 weeks ago, when doing the maximum intensity of activity, chest pain, chest tightness and angina pectoris:

<sub>1</sub> obviously increase <sub>2</sub> Slight increase <sub>3</sub> the same <sub>4</sub> Minor reduction <sub>5</sub> obviously decrease

3. The average number of episodes of chest pain, chest tightness, and angina in the past 4 weeks:

<sub>1</sub> ≥four times/day <sub>2</sub> One-three times/day <sub>3</sub> ≥three times/week <sub>4</sub> one-two times/week

<sub>5</sub> < 1 time/week <sub>6</sub> no episode

4. The average number of nitro drugs (such as nitroglycerin) in chest pain, chest tightness, and angina pectoris over the past 4 weeks:

<sub>1</sub> ≥four times/day <sub>2</sub> One-three times/day <sub>3</sub> ≥three times/week <sub>4</sub> one-two times/week

<sub>5</sub> < 1 time/week <sub>6</sub> no episode

5. Due to chest pain, chest tightness and angina pectoris, follow the doctor's advice:

<sub>1</sub> Serious <sub>2</sub> Moderate <sub>3</sub> Minor <sub>4</sub> Very little <sub>5</sub> No <sub>6</sub> Doctor did not administer

6. Satisfaction with various measures for treating chest pain, chest tightness and angina:

<sub>1</sub> Dissatisfied <sub>2</sub> Most dissatisfied <sub>3</sub> Partially satisfied <sub>4</sub> Most satisfied <sub>5</sub> Highly satisfied

7. Satisfaction with the doctor's explanation for chest pain, chest tightness and angina:

<sub>1</sub> Dissatisfied <sub>2</sub> Most dissatisfied <sub>3</sub> Partially satisfied <sub>4</sub> Most satisfied <sub>5</sub> Highly satisfied

8. Overall, satisfaction with the current treatment of chest pain, chest tightness and angina:

<sub>1</sub> Dissatisfied <sub>2</sub> Most dissatisfied <sub>3</sub> Partially satisfied <sub>4</sub> Most satisfied <sub>5</sub> Highly satisfied

|                       |                           |                                |                                               |
|-----------------------|---------------------------|--------------------------------|-----------------------------------------------|
| Visit4<br>20Week±4Day | Drug number<br> _ _ _ _ _ | Patient initials<br> _ _ _ _ _ | Date of visit<br>201 _ Year _ _ Month _ _ Day |
|-----------------------|---------------------------|--------------------------------|-----------------------------------------------|

9. In the past 4 weeks, chest pain, chest tightness and angina have affected the level of fun in life:

<sub>1</sub> Dissatisfied <sub>2</sub> Most dissatisfied <sub>3</sub> Partially satisfied <sub>4</sub> Most satisfied <sub>5</sub> Highly satisfied

10. If you have chest pain, chest tightness and angina in your future life, how would you feel?

<sub>1</sub> Dissatisfied <sub>2</sub> Most dissatisfied <sub>3</sub> Partially satisfied <sub>4</sub> Most satisfied <sub>5</sub> Highly satisfied

11. Concerns about heart attack and sudden death:

<sub>1</sub> Always worried <sub>2</sub> Frequently worried <sub>3</sub> Sometimes worried <sub>4</sub> Very little worried <sub>5</sub> Never worry

\* The Seattle Angina Scale is divided into 5 items and 19 items: Physical activity limitation (PL, question 1), angina stable state (AS, question 2), angina pectoris (AF, question 3-4), treatment satisfaction (TS), question 5-8), disease cognition (DP, question 9-11). After scoring the 19 items of the 5 major items one by one, each score is forwarded. The standard score = (actual score - the lowest score in this aspect) / (the highest score in this aspect - the lowest score in this aspect) ✖ 100, the higher the score, the better the quality of life and the functional state of the patient.

### Angina pectoris symptom score

Score \*: |\_|\_|\_|\_|\_|

|                          |                                          |                                                                                                                                                                                                                                                                                              |                                                                                                                                                                                                                                                                             |                                                                                                                                                                                                                                                                                                                 |
|--------------------------|------------------------------------------|----------------------------------------------------------------------------------------------------------------------------------------------------------------------------------------------------------------------------------------------------------------------------------------------|-----------------------------------------------------------------------------------------------------------------------------------------------------------------------------------------------------------------------------------------------------------------------------|-----------------------------------------------------------------------------------------------------------------------------------------------------------------------------------------------------------------------------------------------------------------------------------------------------------------|
| Number of angina attacks | <input type="checkbox"/> <sub>0</sub> No | <input type="checkbox"/> <sub>2</sub> 2-6 episodes per week                                                                                                                                                                                                                                  | <input type="checkbox"/> <sub>4</sub> 1-3 times a day                                                                                                                                                                                                                       | <input type="checkbox"/> <sub>6</sub> more than 4 episodes per day                                                                                                                                                                                                                                              |
| Angina duration          | <input type="checkbox"/> <sub>0</sub> No | <input type="checkbox"/> <sub>2</sub> Each time the pain lasts less than or equal to 5 minutes                                                                                                                                                                                               | <input type="checkbox"/> <sub>4</sub> Each time the pain lasts longer than 5 minutes and less than 10                                                                                                                                                                       | <input type="checkbox"/> <sub>6</sub> Each time the pain lasts for 10 minutes or more                                                                                                                                                                                                                           |
| Angina pain level        | <input type="checkbox"/> <sub>0</sub> No | <input type="checkbox"/> <sub>2</sub> Physical activity that is heavier than daily activities causes angina and daily activities are asymptomatic. Activities that can cause angina, such as trotting on the ground, fast or holding heavy objects on the third floor, up steep slopes, etc. | <input type="checkbox"/> <sub>4</sub> Daily physical activity causes angina and daily activities are slightly limited. Activities that can cause angina, such as walking 3-4 stations (3-4 miles) at normal speed under normal conditions, on the third floor, uphill, etc. | <input type="checkbox"/> <sub>6</sub> Lighter physical activity than daily activities causes angina and daily activities are significantly limited. Activities that can cause angina, such as walking 1-2 stations (1-2 miles) at normal speed under normal conditions, on the second floor, gentle slope, etc. |
| Nitroglycerin dosage     | <input type="checkbox"/> <sub>0</sub> No | <input type="checkbox"/> <sub>2</sub> 1-4 tablets per week                                                                                                                                                                                                                                   | <input type="checkbox"/> <sub>4</sub> 5-9 tablets per week                                                                                                                                                                                                                  | <input type="checkbox"/> <sub>6</sub> Take more than 10 tablets a week                                                                                                                                                                                                                                          |

|                       |                           |                                |                                               |
|-----------------------|---------------------------|--------------------------------|-----------------------------------------------|
| Visit4<br>20Week±4Day | Drug number<br> _ _ _ _ _ | Patient initials<br> _ _ _ _ _ | Date of visit<br>201 _ Year _ _ Month _ _ Day |
|-----------------------|---------------------------|--------------------------------|-----------------------------------------------|

### Laboratory inspection

| Indicator                 | Measured Value | Unit                                             | Clinical significance *                                                                                                                                 |   |   |   | Anomalous cause explanation |
|---------------------------|----------------|--------------------------------------------------|---------------------------------------------------------------------------------------------------------------------------------------------------------|---|---|---|-----------------------------|
|                           |                |                                                  | 1                                                                                                                                                       | 2 | 3 | 4 |                             |
| <b>Blood sugar</b>        |                | <b>Report date:</b> 201 _ Year _ _ Month _ _ Day |                                                                                                                                                         |   |   |   |                             |
| FPG                       |                | mmol/L                                           | <input type="checkbox"/> <sub>1</sub> <input type="checkbox"/> <sub>2</sub> <input type="checkbox"/> <sub>3</sub> <input type="checkbox"/> <sub>4</sub> |   |   |   |                             |
| 2hPG                      |                | mmol/L                                           | <input type="checkbox"/> <sub>1</sub> <input type="checkbox"/> <sub>2</sub> <input type="checkbox"/> <sub>3</sub> <input type="checkbox"/> <sub>4</sub> |   |   |   |                             |
| HbA1c                     |                | mg/dl                                            | <input type="checkbox"/> <sub>1</sub> <input type="checkbox"/> <sub>2</sub> <input type="checkbox"/> <sub>3</sub> <input type="checkbox"/> <sub>4</sub> |   |   |   |                             |
| Fasting insulin           |                | μU/ml                                            | <input type="checkbox"/> <sub>1</sub> <input type="checkbox"/> <sub>2</sub> <input type="checkbox"/> <sub>3</sub> <input type="checkbox"/> <sub>4</sub> |   |   |   |                             |
| <b>Blood lipid</b>        |                | <b>Report date:</b> 201 _ Year _ _ Month _ _ Day |                                                                                                                                                         |   |   |   |                             |
| HDL-C                     |                | mmol/L                                           | <input type="checkbox"/> <sub>1</sub> <input type="checkbox"/> <sub>2</sub> <input type="checkbox"/> <sub>3</sub> <input type="checkbox"/> <sub>4</sub> |   |   |   |                             |
| LDL-C                     |                | mmol/L                                           | <input type="checkbox"/> <sub>1</sub> <input type="checkbox"/> <sub>2</sub> <input type="checkbox"/> <sub>3</sub> <input type="checkbox"/> <sub>4</sub> |   |   |   |                             |
| TG                        |                | mmol/L                                           | <input type="checkbox"/> <sub>1</sub> <input type="checkbox"/> <sub>2</sub> <input type="checkbox"/> <sub>3</sub> <input type="checkbox"/> <sub>4</sub> |   |   |   |                             |
| CH                        |                | mmol/L                                           | <input type="checkbox"/> <sub>1</sub> <input type="checkbox"/> <sub>2</sub> <input type="checkbox"/> <sub>3</sub> <input type="checkbox"/> <sub>4</sub> |   |   |   |                             |
| <b>C-reactive protein</b> |                | <b>Report date:</b> 201 _ Year _ _ Month _ _ Day |                                                                                                                                                         |   |   |   |                             |
| CRP                       |                | mg/L                                             | <input type="checkbox"/> <sub>1</sub> <input type="checkbox"/> <sub>2</sub> <input type="checkbox"/> <sub>3</sub> <input type="checkbox"/> <sub>4</sub> |   |   |   |                             |

\* Clinical significance judgment: (1) normal (2) abnormal but no clinical significance (3) abnormal and clinical significance (4) not investigated.

### Is there a combined medication?

- <sub>0</sub>No  
<sub>1</sub>Yes→Please fill out the “Combined Medication Record Form” on page 47.

### Are there any adverse events?

- <sub>0</sub>No  
<sub>1</sub>Yes→Please fill out the “Adverse Event Record Form” on page 48 in detail.

### Is there an unscheduled laboratory check?

- <sub>0</sub>No  
<sub>1</sub>Yes→Record the results to “Unplanned Laboratory Inspection Results” on page 49

**Release of test drug:** Ginkgo biloba drop pills 900 pills (10 bottles)

**Researcher's signature:** \_\_\_\_\_ **Date:** 201|\_|Year|\_|\_|Month|\_|\_|Day

|                       |                         |                              |                                                    |
|-----------------------|-------------------------|------------------------------|----------------------------------------------------|
| Visit5<br>28Week±4Day | Drug number<br> _ _ _ _ | Patient initials<br> _ _ _ _ | Date of visit<br>201 _ Year _ _ Month _ _ <br> Day |
|-----------------------|-------------------------|------------------------------|----------------------------------------------------|

Seattle Angina Questionnaire(SAQ)

Score \*: |\_|\_|\_|\_|

1. In the past 4 weeks, the following restrictions have been caused by chest pain, chest tightness and angina:

|                                                  | Severely restricted                   | Moderately restricted                 | Mildly restricted                     | Slightly restricted                   | Unrestricted                          | Limited for other reasons             |
|--------------------------------------------------|---------------------------------------|---------------------------------------|---------------------------------------|---------------------------------------|---------------------------------------|---------------------------------------|
| Dress yourself                                   | <input type="checkbox"/> <sub>1</sub> | <input type="checkbox"/> <sub>2</sub> | <input type="checkbox"/> <sub>3</sub> | <input type="checkbox"/> <sub>4</sub> | <input type="checkbox"/> <sub>5</sub> | <input type="checkbox"/> <sub>6</sub> |
| Indoor walk                                      | <input type="checkbox"/> <sub>1</sub> | <input type="checkbox"/> <sub>2</sub> | <input type="checkbox"/> <sub>3</sub> | <input type="checkbox"/> <sub>4</sub> | <input type="checkbox"/> <sub>5</sub> | <input type="checkbox"/> <sub>6</sub> |
| Take a shower                                    | <input type="checkbox"/> <sub>1</sub> | <input type="checkbox"/> <sub>2</sub> | <input type="checkbox"/> <sub>3</sub> | <input type="checkbox"/> <sub>4</sub> | <input type="checkbox"/> <sub>5</sub> | <input type="checkbox"/> <sub>6</sub> |
| Climbing or stairway<br>(three floors, non-stop) | <input type="checkbox"/> <sub>1</sub> | <input type="checkbox"/> <sub>2</sub> | <input type="checkbox"/> <sub>3</sub> | <input type="checkbox"/> <sub>4</sub> | <input type="checkbox"/> <sub>5</sub> | <input type="checkbox"/> <sub>6</sub> |
| Outdoor activities or pick up                    | <input type="checkbox"/> <sub>1</sub> | <input type="checkbox"/> <sub>2</sub> | <input type="checkbox"/> <sub>3</sub> | <input type="checkbox"/> <sub>4</sub> | <input type="checkbox"/> <sub>5</sub> | <input type="checkbox"/> <sub>6</sub> |
| Walk lightly (one kilometer)                     | <input type="checkbox"/> <sub>1</sub> | <input type="checkbox"/> <sub>2</sub> | <input type="checkbox"/> <sub>3</sub> | <input type="checkbox"/> <sub>4</sub> | <input type="checkbox"/> <sub>5</sub> | <input type="checkbox"/> <sub>6</sub> |
| Jogging (one kilometer)                          | <input type="checkbox"/> <sub>1</sub> | <input type="checkbox"/> <sub>2</sub> | <input type="checkbox"/> <sub>3</sub> | <input type="checkbox"/> <sub>4</sub> | <input type="checkbox"/> <sub>5</sub> | <input type="checkbox"/> <sub>6</sub> |
| Lift or move heavy objects                       | <input type="checkbox"/> <sub>1</sub> | <input type="checkbox"/> <sub>2</sub> | <input type="checkbox"/> <sub>3</sub> | <input type="checkbox"/> <sub>4</sub> | <input type="checkbox"/> <sub>5</sub> | <input type="checkbox"/> <sub>6</sub> |
| Strenuous exercise (such as swimming or playing) | <input type="checkbox"/> <sub>1</sub> | <input type="checkbox"/> <sub>2</sub> | <input type="checkbox"/> <sub>3</sub> | <input type="checkbox"/> <sub>4</sub> | <input type="checkbox"/> <sub>5</sub> | <input type="checkbox"/> <sub>6</sub> |

2. Compared with 4 weeks ago, when doing the maximum intensity of activity, chest pain, chest tightness and angina pectoris:

<sub>1</sub> obviously increase <sub>2</sub> Slight increase <sub>3</sub> the same <sub>4</sub> Minor reduction <sub>5</sub> obviously decrease

3. The average number of episodes of chest pain, chest tightness, and angina in the past 4 weeks:

<sub>1</sub> ≥four times/day <sub>2</sub> One-three times/day <sub>3</sub> ≥three times/week <sub>4</sub> one-two times/week

<sub>5</sub> < 1 time/week <sub>6</sub> no episode

4. The average number of nitro drugs (such as nitroglycerin) in chest pain, chest tightness, and angina pectoris over the past 4 weeks:

<sub>1</sub> ≥four times/day <sub>2</sub> One-three times/day <sub>3</sub> ≥three times/week <sub>4</sub> one-two times/week

<sub>5</sub> < 1 time/week <sub>6</sub> no episode

5. Due to chest pain, chest tightness and angina pectoris, follow the doctor's advice:

<sub>1</sub> Serious <sub>2</sub> Moderate <sub>3</sub> Minor <sub>4</sub> Very little <sub>5</sub> No <sub>6</sub> Doctor did not administer

6. Satisfaction with various measures for treating chest pain, chest tightness and angina:

<sub>1</sub> Dissatisfied <sub>2</sub> Most dissatisfied <sub>3</sub> Partially satisfied <sub>4</sub> Most satisfied <sub>5</sub> Highly satisfied

7. Satisfaction with the doctor's explanation for chest pain, chest tightness and angina:

<sub>1</sub> Dissatisfied <sub>2</sub> Most dissatisfied <sub>3</sub> Partially satisfied <sub>4</sub> Most satisfied <sub>5</sub> Highly satisfied

8. Overall, satisfaction with the current treatment of chest pain, chest tightness and angina:

<sub>1</sub> Dissatisfied <sub>2</sub> Most dissatisfied <sub>3</sub> Partially satisfied <sub>4</sub> Most satisfied <sub>5</sub> Highly satisfied



|                       |                           |                                |                                                      |
|-----------------------|---------------------------|--------------------------------|------------------------------------------------------|
| Visit5<br>28Week±4Day | Drug number<br> _ _ _ _ _ | Patient initials<br> _ _ _ _ _ | Date of visit<br>201 _ Year _ _ Month _ _ <br> _ Day |
|-----------------------|---------------------------|--------------------------------|------------------------------------------------------|

9. In the past 4 weeks, chest pain, chest tightness and angina have affected the level of fun in life:

<sub>1</sub> Dissatisfied <sub>2</sub> Most dissatisfied <sub>3</sub> Partially satisfied <sub>4</sub> Most satisfied <sub>5</sub> Highly satisfied

10. If you have chest pain, chest tightness and angina in your future life, how would you feel?

<sub>1</sub> Dissatisfied <sub>2</sub> Most dissatisfied <sub>3</sub> Partially satisfied <sub>4</sub> Most satisfied <sub>5</sub> Highly satisfied

11. Concerns about heart attack and sudden death:

<sub>1</sub> Always worried <sub>2</sub> Frequently worried <sub>3</sub> Sometimes worried <sub>4</sub> Very little worried <sub>5</sub> Never worry

\* The Seattle Angina Scale is divided into 5 items and 19 items: Physical activity limitation (PL, question 1), angina stable state (AS, question 2), angina pectoris (AF, question 3-4), treatment satisfaction (TS), question 5-8), disease cognition (DP, question 9-11). After scoring the 19 items of the 5 major items one by one, each score is forwarded. The standard score = (actual score - the lowest score in this aspect) / (the highest score in this aspect - the lowest score in this aspect) ✖100, the higher the score, the better the quality of life and the functional state of the patient.

### Angina pectoris symptom score

Score \*: |\_|\_|\_|\_|\_|

|                          |                                          |                                                                                                                                                                                                                                                                                              |                                                                                                                                                                                                                                                                             |                                                                                                                                                                                                                                                                                                                 |
|--------------------------|------------------------------------------|----------------------------------------------------------------------------------------------------------------------------------------------------------------------------------------------------------------------------------------------------------------------------------------------|-----------------------------------------------------------------------------------------------------------------------------------------------------------------------------------------------------------------------------------------------------------------------------|-----------------------------------------------------------------------------------------------------------------------------------------------------------------------------------------------------------------------------------------------------------------------------------------------------------------|
| Number of angina attacks | <input type="checkbox"/> <sub>0</sub> No | <input type="checkbox"/> <sub>2</sub> 2-6 episodes per week                                                                                                                                                                                                                                  | <input type="checkbox"/> <sub>4</sub> 1-3 times a day                                                                                                                                                                                                                       | <input type="checkbox"/> <sub>6</sub> more than 4 episodes per day                                                                                                                                                                                                                                              |
| Angina duration          | <input type="checkbox"/> <sub>0</sub> No | <input type="checkbox"/> <sub>2</sub> Each time the pain lasts less than or equal to 5 minutes                                                                                                                                                                                               | <input type="checkbox"/> <sub>4</sub> Each time the pain lasts longer than 5 minutes and less than 10                                                                                                                                                                       | <input type="checkbox"/> <sub>6</sub> Each time the pain lasts for 10 minutes or more                                                                                                                                                                                                                           |
| Angina pain level        | <input type="checkbox"/> <sub>0</sub> No | <input type="checkbox"/> <sub>2</sub> Physical activity that is heavier than daily activities causes angina and daily activities are asymptomatic. Activities that can cause angina, such as trotting on the ground, fast or holding heavy objects on the third floor, up steep slopes, etc. | <input type="checkbox"/> <sub>4</sub> Daily physical activity causes angina and daily activities are slightly limited. Activities that can cause angina, such as walking 3-4 stations (3-4 miles) at normal speed under normal conditions, on the third floor, uphill, etc. | <input type="checkbox"/> <sub>6</sub> Lighter physical activity than daily activities causes angina and daily activities are significantly limited. Activities that can cause angina, such as walking 1-2 stations (1-2 miles) at normal speed under normal conditions, on the second floor, gentle slope, etc. |
| Nitroglycerin dosage     | <input type="checkbox"/> <sub>0</sub> No | <input type="checkbox"/> <sub>2</sub> 1-4 tablets per week                                                                                                                                                                                                                                   | <input type="checkbox"/> <sub>4</sub> 5-9 tablets per week                                                                                                                                                                                                                  | <input type="checkbox"/> <sub>6</sub> Take more than 10 tablets a week                                                                                                                                                                                                                                          |

|                       |                           |                                |                                                    |
|-----------------------|---------------------------|--------------------------------|----------------------------------------------------|
| Visit5<br>28Week±4Day | Drug number<br> _ _ _ _ _ | Patient initials<br> _ _ _ _ _ | Date of visit<br>201 _ Year _ _ Month _ _ <br> Day |
|-----------------------|---------------------------|--------------------------------|----------------------------------------------------|

**Laboratory inspection**

| Indicator                 | Measured Value | Unit                                             | Clinical significance *                                                                                                                                 |   |   |   | Anomalous cause explanation |
|---------------------------|----------------|--------------------------------------------------|---------------------------------------------------------------------------------------------------------------------------------------------------------|---|---|---|-----------------------------|
|                           |                |                                                  | 1                                                                                                                                                       | 2 | 3 | 4 |                             |
| <b>Blood sugar</b>        |                | <b>Report date:</b> 201 _ Year _ _ Month _ _ Day |                                                                                                                                                         |   |   |   |                             |
| FPG                       |                | mmol/L                                           | <input type="checkbox"/> <sub>1</sub> <input type="checkbox"/> <sub>2</sub> <input type="checkbox"/> <sub>3</sub> <input type="checkbox"/> <sub>4</sub> |   |   |   |                             |
| 2hPG                      |                | mmol/L                                           | <input type="checkbox"/> <sub>1</sub> <input type="checkbox"/> <sub>2</sub> <input type="checkbox"/> <sub>3</sub> <input type="checkbox"/> <sub>4</sub> |   |   |   |                             |
| HbA1c                     |                | mg/dl                                            | <input type="checkbox"/> <sub>1</sub> <input type="checkbox"/> <sub>2</sub> <input type="checkbox"/> <sub>3</sub> <input type="checkbox"/> <sub>4</sub> |   |   |   |                             |
| Fasting insulin           |                | μU/ml                                            | <input type="checkbox"/> <sub>1</sub> <input type="checkbox"/> <sub>2</sub> <input type="checkbox"/> <sub>3</sub> <input type="checkbox"/> <sub>4</sub> |   |   |   |                             |
| <b>Blood lipid</b>        |                | <b>Report date:</b> 201 _ Year _ _ Month _ _ Day |                                                                                                                                                         |   |   |   |                             |
| HDL-C                     |                | mmol/L                                           | <input type="checkbox"/> <sub>1</sub> <input type="checkbox"/> <sub>2</sub> <input type="checkbox"/> <sub>3</sub> <input type="checkbox"/> <sub>4</sub> |   |   |   |                             |
| LDL-C                     |                | mmol/L                                           | <input type="checkbox"/> <sub>1</sub> <input type="checkbox"/> <sub>2</sub> <input type="checkbox"/> <sub>3</sub> <input type="checkbox"/> <sub>4</sub> |   |   |   |                             |
| TG                        |                | mmol/L                                           | <input type="checkbox"/> <sub>1</sub> <input type="checkbox"/> <sub>2</sub> <input type="checkbox"/> <sub>3</sub> <input type="checkbox"/> <sub>4</sub> |   |   |   |                             |
| CH                        |                | mmol/L                                           | <input type="checkbox"/> <sub>1</sub> <input type="checkbox"/> <sub>2</sub> <input type="checkbox"/> <sub>3</sub> <input type="checkbox"/> <sub>4</sub> |   |   |   |                             |
| <b>C-reactive protein</b> |                | <b>Report date:</b> 201 _ Year _ _ Month _ _ Day |                                                                                                                                                         |   |   |   |                             |
| CRP                       |                | mg/L                                             | <input type="checkbox"/> <sub>1</sub> <input type="checkbox"/> <sub>2</sub> <input type="checkbox"/> <sub>3</sub> <input type="checkbox"/> <sub>4</sub> |   |   |   |                             |

\* Clinical significance judgment: (1) normal (2) abnormal but no clinical significance (3) abnormal and clinical significance (4) not investigated.

|                       |                           |                                |                                                    |
|-----------------------|---------------------------|--------------------------------|----------------------------------------------------|
| Visit5<br>28Week±4Day | Drug number<br> _ _ _ _ _ | Patient initials<br> _ _ _ _ _ | Date of visit<br>201 _ Year _ _ Month _ _ <br> Day |
|-----------------------|---------------------------|--------------------------------|----------------------------------------------------|

**Is the test drug returned?**

- <sub>0</sub>No→Unreturned reason: <sub>2</sub> Take all <sub>3</sub> Lost <sub>4</sub> Other\_\_\_\_\_
- <sub>1</sub>Yes→ Ginkgo biloba drop pills |\_|\_|\_|\_|\_| pills

**Is there a combined medication?**

- <sub>0</sub>No
- <sub>1</sub>Yes→Please fill out the “Combined Medication Record Form” on page 47.

**Are there any adverse events?**

- <sub>0</sub>No
- <sub>1</sub>Yes→Please fill out the “Adverse Event Record Form” on page 48 in detail.

**Is there an unscheduled laboratory check?**

- <sub>0</sub>No
- <sub>1</sub>Yes→Record the results to “Unplanned Laboratory Inspection Results” on page 49

**Researcher's signature:** \_\_\_\_\_ **Date:** 201|\_|Year|\_|\_|Month|\_|\_|Day

|                       |                         |                              |                                               |
|-----------------------|-------------------------|------------------------------|-----------------------------------------------|
| Visit6<br>30Week±4Day | Drug number<br> _ _ _ _ | Patient initials<br> _ _ _ _ | Date of visit<br>201 _ Year _ _ Month _ _ Day |
|-----------------------|-------------------------|------------------------------|-----------------------------------------------|

Seattle Angina Questionnaire(SAQ)

Score \*: |\_|\_|\_|\_|

1. In the past 4 weeks, the following restrictions have been caused by chest pain, chest tightness and angina:

|                                                  | Severely restricted                   | Moderately restricted                 | Mildly restricted                     | Slightly restricted                   | Unrestricted                          | Limited for other reasons             |
|--------------------------------------------------|---------------------------------------|---------------------------------------|---------------------------------------|---------------------------------------|---------------------------------------|---------------------------------------|
| Dress yourself                                   | <input type="checkbox"/> <sub>1</sub> | <input type="checkbox"/> <sub>2</sub> | <input type="checkbox"/> <sub>3</sub> | <input type="checkbox"/> <sub>4</sub> | <input type="checkbox"/> <sub>5</sub> | <input type="checkbox"/> <sub>6</sub> |
| Indoor walk                                      | <input type="checkbox"/> <sub>1</sub> | <input type="checkbox"/> <sub>2</sub> | <input type="checkbox"/> <sub>3</sub> | <input type="checkbox"/> <sub>4</sub> | <input type="checkbox"/> <sub>5</sub> | <input type="checkbox"/> <sub>6</sub> |
| Take a shower                                    | <input type="checkbox"/> <sub>1</sub> | <input type="checkbox"/> <sub>2</sub> | <input type="checkbox"/> <sub>3</sub> | <input type="checkbox"/> <sub>4</sub> | <input type="checkbox"/> <sub>5</sub> | <input type="checkbox"/> <sub>6</sub> |
| Climbing or stairway<br>(three floors, non-stop) | <input type="checkbox"/> <sub>1</sub> | <input type="checkbox"/> <sub>2</sub> | <input type="checkbox"/> <sub>3</sub> | <input type="checkbox"/> <sub>4</sub> | <input type="checkbox"/> <sub>5</sub> | <input type="checkbox"/> <sub>6</sub> |
| Outdoor activities or pick up                    | <input type="checkbox"/> <sub>1</sub> | <input type="checkbox"/> <sub>2</sub> | <input type="checkbox"/> <sub>3</sub> | <input type="checkbox"/> <sub>4</sub> | <input type="checkbox"/> <sub>5</sub> | <input type="checkbox"/> <sub>6</sub> |
| Walk lightly (one kilometer)                     | <input type="checkbox"/> <sub>1</sub> | <input type="checkbox"/> <sub>2</sub> | <input type="checkbox"/> <sub>3</sub> | <input type="checkbox"/> <sub>4</sub> | <input type="checkbox"/> <sub>5</sub> | <input type="checkbox"/> <sub>6</sub> |
| Jogging (one kilometer)                          | <input type="checkbox"/> <sub>1</sub> | <input type="checkbox"/> <sub>2</sub> | <input type="checkbox"/> <sub>3</sub> | <input type="checkbox"/> <sub>4</sub> | <input type="checkbox"/> <sub>5</sub> | <input type="checkbox"/> <sub>6</sub> |
| Lift or move heavy objects                       | <input type="checkbox"/> <sub>1</sub> | <input type="checkbox"/> <sub>2</sub> | <input type="checkbox"/> <sub>3</sub> | <input type="checkbox"/> <sub>4</sub> | <input type="checkbox"/> <sub>5</sub> | <input type="checkbox"/> <sub>6</sub> |
| Strenuous exercise (such as swimming or playing) | <input type="checkbox"/> <sub>1</sub> | <input type="checkbox"/> <sub>2</sub> | <input type="checkbox"/> <sub>3</sub> | <input type="checkbox"/> <sub>4</sub> | <input type="checkbox"/> <sub>5</sub> | <input type="checkbox"/> <sub>6</sub> |

2. Compared with 4 weeks ago, when doing the maximum intensity of activity, chest pain, chest tightness and angina pectoris:

<sub>1</sub> obviously increase <sub>2</sub> Slight increase <sub>3</sub> the same <sub>4</sub> Minor reduction <sub>5</sub> obviously decrease

3. The average number of episodes of chest pain, chest tightness, and angina in the past 4 weeks:

<sub>1</sub> ≥four times/day <sub>2</sub> One-three times/day <sub>3</sub> ≥three times/week <sub>4</sub> one-two times/week

<sub>5</sub> < 1 time/week <sub>6</sub> no episode

4. The average number of nitro drugs (such as nitroglycerin) in chest pain, chest tightness, and angina pectoris over the past 4 weeks:

<sub>1</sub> ≥four times/day <sub>2</sub> One-three times/day <sub>3</sub> ≥three times/week <sub>4</sub> one-two times/week

<sub>5</sub> < 1 time/week <sub>6</sub> no episode

5. Due to chest pain, chest tightness and angina pectoris, follow the doctor's advice:

<sub>1</sub> Serious <sub>2</sub> Moderate <sub>3</sub> Minor <sub>4</sub> Very little <sub>5</sub> No <sub>6</sub> Doctor did not administer

6. Satisfaction with various measures for treating chest pain, chest tightness and angina:

<sub>1</sub> Dissatisfied <sub>2</sub> Most dissatisfied <sub>3</sub> Partially satisfied <sub>4</sub> Most satisfied <sub>5</sub> Highly satisfied

7. Satisfaction with the doctor's explanation for chest pain, chest tightness and angina:

<sub>1</sub> Dissatisfied <sub>2</sub> Most dissatisfied <sub>3</sub> Partially satisfied <sub>4</sub> Most satisfied <sub>5</sub> Highly satisfied

8. Overall, satisfaction with the current treatment of chest pain, chest tightness and angina:

<sub>1</sub> Dissatisfied <sub>2</sub> Most dissatisfied <sub>3</sub> Partially satisfied <sub>4</sub> Most satisfied <sub>5</sub> Highly satisfied

|                       |                         |                              |                                               |
|-----------------------|-------------------------|------------------------------|-----------------------------------------------|
| Visit6<br>30Week±4Day | Drug number<br> _ _ _ _ | Patient initials<br> _ _ _ _ | Date of visit<br>201 _ Year _ _ Month _ _ Day |
|-----------------------|-------------------------|------------------------------|-----------------------------------------------|

9. In the past 4 weeks, chest pain, chest tightness and angina have affected the level of fun in life:

<sub>1</sub> Dissatisfied <sub>2</sub> Most dissatisfied <sub>3</sub> Partially satisfied <sub>4</sub> Most satisfied <sub>5</sub> Highly satisfied

10. If you have chest pain, chest tightness and angina in your future life, how would you feel?

<sub>1</sub> Dissatisfied <sub>2</sub> Most dissatisfied <sub>3</sub> Partially satisfied <sub>4</sub> Most satisfied <sub>5</sub> Highly satisfied

11. Concerns about heart attack and sudden death:

<sub>1</sub> Always worried <sub>2</sub> Frequently worried <sub>3</sub> Sometimes worried <sub>4</sub> Very little worried <sub>5</sub> Never worry

\* The Seattle Angina Scale is divided into 5 items and 19 items: Physical activity limitation (PL, question 1), angina stable state (AS, question 2), angina pectoris (AF, question 3-4), treatment satisfaction (TS), question 5-8), disease cognition (DP, question 9-11). After scoring the 19 items of the 5 major items one by one, each score is forwarded. The standard score = (actual score - the lowest score in this aspect) / (the highest score in this aspect - the lowest score in this aspect) ✖100, the higher the score, the better the quality of life and the functional state of the patient.

### Angina pectoris symptom score

Score \*: |\_|\_|\_|\_|

|                          |                                          |                                                                                                                                                                                                                                                                                              |                                                                                                                                                                                                                                                                             |                                                                                                                                                                                                                                                                                                                 |
|--------------------------|------------------------------------------|----------------------------------------------------------------------------------------------------------------------------------------------------------------------------------------------------------------------------------------------------------------------------------------------|-----------------------------------------------------------------------------------------------------------------------------------------------------------------------------------------------------------------------------------------------------------------------------|-----------------------------------------------------------------------------------------------------------------------------------------------------------------------------------------------------------------------------------------------------------------------------------------------------------------|
| Number of angina attacks | <input type="checkbox"/> <sub>0</sub> No | <input type="checkbox"/> <sub>2</sub> 2-6 episodes per week                                                                                                                                                                                                                                  | <input type="checkbox"/> <sub>4</sub> 1-3 times a day                                                                                                                                                                                                                       | <input type="checkbox"/> <sub>6</sub> more than 4 episodes per day                                                                                                                                                                                                                                              |
| Angina duration          | <input type="checkbox"/> <sub>0</sub> No | <input type="checkbox"/> <sub>2</sub> Each time the pain lasts less than or equal to 5 minutes                                                                                                                                                                                               | <input type="checkbox"/> <sub>4</sub> Each time the pain lasts longer than 5 minutes and less than 10                                                                                                                                                                       | <input type="checkbox"/> <sub>6</sub> Each time the pain lasts for 10 minutes or more                                                                                                                                                                                                                           |
| Angina pain level        | <input type="checkbox"/> <sub>0</sub> No | <input type="checkbox"/> <sub>2</sub> Physical activity that is heavier than daily activities causes angina and daily activities are asymptomatic. Activities that can cause angina, such as trotting on the ground, fast or holding heavy objects on the third floor, up steep slopes, etc. | <input type="checkbox"/> <sub>4</sub> Daily physical activity causes angina and daily activities are slightly limited. Activities that can cause angina, such as walking 3-4 stations (3-4 miles) at normal speed under normal conditions, on the third floor, uphill, etc. | <input type="checkbox"/> <sub>6</sub> Lighter physical activity than daily activities causes angina and daily activities are significantly limited. Activities that can cause angina, such as walking 1-2 stations (1-2 miles) at normal speed under normal conditions, on the second floor, gentle slope, etc. |
| Nitroglycerin dosage     | <input type="checkbox"/> <sub>0</sub> No | <input type="checkbox"/> <sub>2</sub> 1-4 tablets per week                                                                                                                                                                                                                                   | <input type="checkbox"/> <sub>4</sub> 5-9 tablets per week                                                                                                                                                                                                                  | <input type="checkbox"/> <sub>6</sub> Take more than 10 tablets a week                                                                                                                                                                                                                                          |

|                       |                         |                              |                                               |
|-----------------------|-------------------------|------------------------------|-----------------------------------------------|
| Visit6<br>30Week±4Day | Drug number<br> _ _ _ _ | Patient initials<br> _ _ _ _ | Date of visit<br>201 _ Year _ _ Month _ _ Day |
|-----------------------|-------------------------|------------------------------|-----------------------------------------------|

**Laboratory inspection**

| Indicator                 | Measured Value | Unit                                             | Clinical significance *                                                                                                                                 |   |   |   | Anomalous cause explanation |
|---------------------------|----------------|--------------------------------------------------|---------------------------------------------------------------------------------------------------------------------------------------------------------|---|---|---|-----------------------------|
|                           |                |                                                  | 1                                                                                                                                                       | 2 | 3 | 4 |                             |
| <b>Blood sugar</b>        |                | <b>Report date:</b> 201 _ Year _ _ Month _ _ Day |                                                                                                                                                         |   |   |   |                             |
| FPG                       |                | mmol/L                                           | <input type="checkbox"/> <sub>1</sub> <input type="checkbox"/> <sub>2</sub> <input type="checkbox"/> <sub>3</sub> <input type="checkbox"/> <sub>4</sub> |   |   |   |                             |
| 2hPG                      |                | mmol/L                                           | <input type="checkbox"/> <sub>1</sub> <input type="checkbox"/> <sub>2</sub> <input type="checkbox"/> <sub>3</sub> <input type="checkbox"/> <sub>4</sub> |   |   |   |                             |
| HbA1c                     |                | mg/dl                                            | <input type="checkbox"/> <sub>1</sub> <input type="checkbox"/> <sub>2</sub> <input type="checkbox"/> <sub>3</sub> <input type="checkbox"/> <sub>4</sub> |   |   |   |                             |
| Fasting insulin           |                | μU/ml                                            | <input type="checkbox"/> <sub>1</sub> <input type="checkbox"/> <sub>2</sub> <input type="checkbox"/> <sub>3</sub> <input type="checkbox"/> <sub>4</sub> |   |   |   |                             |
| <b>Blood lipid</b>        |                | <b>Report date:</b> 201 _ Year _ _ Month _ _ Day |                                                                                                                                                         |   |   |   |                             |
| HDL-C                     |                | mmol/L                                           | <input type="checkbox"/> <sub>1</sub> <input type="checkbox"/> <sub>2</sub> <input type="checkbox"/> <sub>3</sub> <input type="checkbox"/> <sub>4</sub> |   |   |   |                             |
| LDL-C                     |                | mmol/L                                           | <input type="checkbox"/> <sub>1</sub> <input type="checkbox"/> <sub>2</sub> <input type="checkbox"/> <sub>3</sub> <input type="checkbox"/> <sub>4</sub> |   |   |   |                             |
| TG                        |                | mmol/L                                           | <input type="checkbox"/> <sub>1</sub> <input type="checkbox"/> <sub>2</sub> <input type="checkbox"/> <sub>3</sub> <input type="checkbox"/> <sub>4</sub> |   |   |   |                             |
| CH                        |                | mmol/L                                           | <input type="checkbox"/> <sub>1</sub> <input type="checkbox"/> <sub>2</sub> <input type="checkbox"/> <sub>3</sub> <input type="checkbox"/> <sub>4</sub> |   |   |   |                             |
| <b>C-reactive protein</b> |                | <b>Report date:</b> 201 _ Year _ _ Month _ _ Day |                                                                                                                                                         |   |   |   |                             |
| CRP                       |                | mg/L                                             | <input type="checkbox"/> <sub>1</sub> <input type="checkbox"/> <sub>2</sub> <input type="checkbox"/> <sub>3</sub> <input type="checkbox"/> <sub>4</sub> |   |   |   |                             |

\* Clinical significance judgment: (1) normal (2) abnormal but no clinical significance (3) abnormal and clinical significance (4) not investigated.

**Is there a combined medication?**

|                                                                                                                                                         |
|---------------------------------------------------------------------------------------------------------------------------------------------------------|
| <input type="checkbox"/> <sub>0</sub> No<br><input type="checkbox"/> <sub>1</sub> Yes→Please fill out the “Combined Medication Record Form” on page 47. |
|---------------------------------------------------------------------------------------------------------------------------------------------------------|

**Are there any adverse events?**

|                                                                                                                                                             |
|-------------------------------------------------------------------------------------------------------------------------------------------------------------|
| <input type="checkbox"/> <sub>0</sub> No<br><input type="checkbox"/> <sub>1</sub> Yes→Please fill out the “Adverse Event Record Form” on page 48 in detail. |
|-------------------------------------------------------------------------------------------------------------------------------------------------------------|

**Is there an unscheduled laboratory check?**

|                                                                                                                                                                  |
|------------------------------------------------------------------------------------------------------------------------------------------------------------------|
| <input type="checkbox"/> <sub>0</sub> No<br><input type="checkbox"/> <sub>1</sub> Yes→Record the results to “Unplanned Laboratory Inspection Results” on page 49 |
|------------------------------------------------------------------------------------------------------------------------------------------------------------------|

**Release of test drug:** Ginkgo biloba drop pills 900 pills (10 bottles)

**Researcher's signature:** \_\_\_\_\_ **Date:** 201|\_|Year|\_|\_|Month|\_|\_|Day

|                       |                         |                              |                                               |
|-----------------------|-------------------------|------------------------------|-----------------------------------------------|
| Visit7<br>38Week±4Day | Drug number<br> _ _ _ _ | Patient initials<br> _ _ _ _ | Date of visit<br>201 _ Year _ _ Month _ _ Day |
|-----------------------|-------------------------|------------------------------|-----------------------------------------------|

Seattle Angina Questionnaire(SAQ)

Score \*: |\_|\_|\_|\_|

1. In the past 4 weeks, the following restrictions have been caused by chest pain, chest tightness and angina:

|                                                  | Severely restricted                   | Moderately restricted                 | Mildly restricted                     | Slightly restricted                   | Unrestricted                          | Limited for other reasons             |
|--------------------------------------------------|---------------------------------------|---------------------------------------|---------------------------------------|---------------------------------------|---------------------------------------|---------------------------------------|
| Dress yourself                                   | <input type="checkbox"/> <sub>1</sub> | <input type="checkbox"/> <sub>2</sub> | <input type="checkbox"/> <sub>3</sub> | <input type="checkbox"/> <sub>4</sub> | <input type="checkbox"/> <sub>5</sub> | <input type="checkbox"/> <sub>6</sub> |
| Indoor walk                                      | <input type="checkbox"/> <sub>1</sub> | <input type="checkbox"/> <sub>2</sub> | <input type="checkbox"/> <sub>3</sub> | <input type="checkbox"/> <sub>4</sub> | <input type="checkbox"/> <sub>5</sub> | <input type="checkbox"/> <sub>6</sub> |
| Take a shower                                    | <input type="checkbox"/> <sub>1</sub> | <input type="checkbox"/> <sub>2</sub> | <input type="checkbox"/> <sub>3</sub> | <input type="checkbox"/> <sub>4</sub> | <input type="checkbox"/> <sub>5</sub> | <input type="checkbox"/> <sub>6</sub> |
| Climbing or stairway<br>(three floors, non-stop) | <input type="checkbox"/> <sub>1</sub> | <input type="checkbox"/> <sub>2</sub> | <input type="checkbox"/> <sub>3</sub> | <input type="checkbox"/> <sub>4</sub> | <input type="checkbox"/> <sub>5</sub> | <input type="checkbox"/> <sub>6</sub> |
| Outdoor activities or pick up                    | <input type="checkbox"/> <sub>1</sub> | <input type="checkbox"/> <sub>2</sub> | <input type="checkbox"/> <sub>3</sub> | <input type="checkbox"/> <sub>4</sub> | <input type="checkbox"/> <sub>5</sub> | <input type="checkbox"/> <sub>6</sub> |
| Walk lightly (one kilometer)                     | <input type="checkbox"/> <sub>1</sub> | <input type="checkbox"/> <sub>2</sub> | <input type="checkbox"/> <sub>3</sub> | <input type="checkbox"/> <sub>4</sub> | <input type="checkbox"/> <sub>5</sub> | <input type="checkbox"/> <sub>6</sub> |
| Jogging (one kilometer)                          | <input type="checkbox"/> <sub>1</sub> | <input type="checkbox"/> <sub>2</sub> | <input type="checkbox"/> <sub>3</sub> | <input type="checkbox"/> <sub>4</sub> | <input type="checkbox"/> <sub>5</sub> | <input type="checkbox"/> <sub>6</sub> |
| Lift or move heavy objects                       | <input type="checkbox"/> <sub>1</sub> | <input type="checkbox"/> <sub>2</sub> | <input type="checkbox"/> <sub>3</sub> | <input type="checkbox"/> <sub>4</sub> | <input type="checkbox"/> <sub>5</sub> | <input type="checkbox"/> <sub>6</sub> |
| Strenuous exercise (such as swimming or playing) | <input type="checkbox"/> <sub>1</sub> | <input type="checkbox"/> <sub>2</sub> | <input type="checkbox"/> <sub>3</sub> | <input type="checkbox"/> <sub>4</sub> | <input type="checkbox"/> <sub>5</sub> | <input type="checkbox"/> <sub>6</sub> |

2. Compared with 4 weeks ago, when doing the maximum intensity of activity, chest pain, chest tightness and angina pectoris:

<sub>1</sub> obviously increase <sub>2</sub> Slight increase <sub>3</sub> the same <sub>4</sub> Minor reduction <sub>5</sub> obviously decrease

3. The average number of episodes of chest pain, chest tightness, and angina in the past 4 weeks:

<sub>1</sub> ≥four times/day <sub>2</sub> One-three times/day <sub>3</sub> ≥three times/week <sub>4</sub> one-two times/week

<sub>5</sub> < 1 time/week <sub>6</sub> no episode

4. The average number of nitro drugs (such as nitroglycerin) in chest pain, chest tightness, and angina pectoris over the past 4 weeks:

<sub>1</sub> ≥four times/day <sub>2</sub> One-three times/day <sub>3</sub> ≥three times/week <sub>4</sub> one-two times/week

<sub>5</sub> < 1 time/week <sub>6</sub> no episode

5. Due to chest pain, chest tightness and angina pectoris, follow the doctor's advice:

<sub>1</sub> Serious <sub>2</sub> Moderate <sub>3</sub> Minor <sub>4</sub> Very little <sub>5</sub> No <sub>6</sub> Doctor did not administer

6. Satisfaction with various measures for treating chest pain, chest tightness and angina:

<sub>1</sub> Dissatisfied <sub>2</sub> Most dissatisfied <sub>3</sub> Partially satisfied <sub>4</sub> Most satisfied <sub>5</sub> Highly satisfied

7. Satisfaction with the doctor's explanation for chest pain, chest tightness and angina:

<sub>1</sub> Dissatisfied <sub>2</sub> Most dissatisfied <sub>3</sub> Partially satisfied <sub>4</sub> Most satisfied <sub>5</sub> Highly satisfied

8. Overall, satisfaction with the current treatment of chest pain, chest tightness and angina:

<sub>1</sub> Dissatisfied <sub>2</sub> Most dissatisfied <sub>3</sub> Partially satisfied <sub>4</sub> Most satisfied <sub>5</sub> Highly satisfied

|                       |                           |                                |                                               |
|-----------------------|---------------------------|--------------------------------|-----------------------------------------------|
| Visit7<br>38Week±4Day | Drug number<br> _ _ _ _ _ | Patient initials<br> _ _ _ _ _ | Date of visit<br>201 _ Year _ _ Month _ _ Day |
|-----------------------|---------------------------|--------------------------------|-----------------------------------------------|

9. In the past 4 weeks, chest pain, chest tightness and angina have affected the level of fun in life:

<sub>1</sub> Dissatisfied <sub>2</sub> Most dissatisfied <sub>3</sub> Partially satisfied <sub>4</sub> Most satisfied <sub>5</sub> Highly satisfied

10. If you have chest pain, chest tightness and angina in your future life, how would you feel?

<sub>1</sub> Dissatisfied <sub>2</sub> Most dissatisfied <sub>3</sub> Partially satisfied <sub>4</sub> Most satisfied <sub>5</sub> Highly satisfied

11. Concerns about heart attack and sudden death:

<sub>1</sub> Always worried <sub>2</sub> Frequently worried <sub>3</sub> Sometimes worried <sub>4</sub> Very little worried <sub>5</sub> Never worry

\* The Seattle Angina Scale is divided into 5 items and 19 items: Physical activity limitation (PL, question 1), angina stable state (AS, question 2), angina pectoris (AF, question 3-4), treatment satisfaction (TS), question 5-8), disease cognition (DP, question 9-11). After scoring the 19 items of the 5 major items one by one, each score is forwarded. The standard score = (actual score - the lowest score in this aspect) / (the highest score in this aspect - the lowest score in this aspect) ✖ 100, the higher the score, the better the quality of life and the functional state of the patient.

### Angina pectoris symptom score

Score \*: |\_|\_|\_|\_|\_|

|                          |                                          |                                                                                                                                                                                                                                                                                              |                                                                                                                                                                                                                                                                             |                                                                                                                                                                                                                                                                                                                 |
|--------------------------|------------------------------------------|----------------------------------------------------------------------------------------------------------------------------------------------------------------------------------------------------------------------------------------------------------------------------------------------|-----------------------------------------------------------------------------------------------------------------------------------------------------------------------------------------------------------------------------------------------------------------------------|-----------------------------------------------------------------------------------------------------------------------------------------------------------------------------------------------------------------------------------------------------------------------------------------------------------------|
| Number of angina attacks | <input type="checkbox"/> <sub>0</sub> No | <input type="checkbox"/> <sub>2</sub> 2-6 episodes per week                                                                                                                                                                                                                                  | <input type="checkbox"/> <sub>4</sub> 1-3 times a day                                                                                                                                                                                                                       | <input type="checkbox"/> <sub>6</sub> more than 4 episodes per day                                                                                                                                                                                                                                              |
| Angina duration          | <input type="checkbox"/> <sub>0</sub> No | <input type="checkbox"/> <sub>2</sub> Each time the pain lasts less than or equal to 5 minutes                                                                                                                                                                                               | <input type="checkbox"/> <sub>4</sub> Each time the pain lasts longer than 5 minutes and less than 10                                                                                                                                                                       | <input type="checkbox"/> <sub>6</sub> Each time the pain lasts for 10 minutes or more                                                                                                                                                                                                                           |
| Angina pain level        | <input type="checkbox"/> <sub>0</sub> No | <input type="checkbox"/> <sub>2</sub> Physical activity that is heavier than daily activities causes angina and daily activities are asymptomatic. Activities that can cause angina, such as trotting on the ground, fast or holding heavy objects on the third floor, up steep slopes, etc. | <input type="checkbox"/> <sub>4</sub> Daily physical activity causes angina and daily activities are slightly limited. Activities that can cause angina, such as walking 3-4 stations (3-4 miles) at normal speed under normal conditions, on the third floor, uphill, etc. | <input type="checkbox"/> <sub>6</sub> Lighter physical activity than daily activities causes angina and daily activities are significantly limited. Activities that can cause angina, such as walking 1-2 stations (1-2 miles) at normal speed under normal conditions, on the second floor, gentle slope, etc. |
| Nitroglycerin dosage     | <input type="checkbox"/> <sub>0</sub> No | <input type="checkbox"/> <sub>2</sub> 1-4 tablets per week                                                                                                                                                                                                                                   | <input type="checkbox"/> <sub>4</sub> 5-9 tablets per week                                                                                                                                                                                                                  | <input type="checkbox"/> <sub>6</sub> Take more than 10 tablets a week                                                                                                                                                                                                                                          |



|                       |                           |                                |                                               |
|-----------------------|---------------------------|--------------------------------|-----------------------------------------------|
| Visit7<br>38Week±4Day | Drug number<br> _ _ _ _ _ | Patient initials<br> _ _ _ _ _ | Date of visit<br>201 _ Year _ _ Month _ _ Day |
|-----------------------|---------------------------|--------------------------------|-----------------------------------------------|

**Laboratory inspection**

| Indicator                 | Measured Value | Unit                                             | Clinical significance *                                                                                                                                 |   |   |   | Anomalous cause explanation |
|---------------------------|----------------|--------------------------------------------------|---------------------------------------------------------------------------------------------------------------------------------------------------------|---|---|---|-----------------------------|
|                           |                |                                                  | 1                                                                                                                                                       | 2 | 3 | 4 |                             |
| <b>Blood sugar</b>        |                | <b>Report date:</b> 201 _ Year _ _ Month _ _ Day |                                                                                                                                                         |   |   |   |                             |
| FPG                       |                | mmol/L                                           | <input type="checkbox"/> <sub>1</sub> <input type="checkbox"/> <sub>2</sub> <input type="checkbox"/> <sub>3</sub> <input type="checkbox"/> <sub>4</sub> |   |   |   |                             |
| 2hPG                      |                | mmol/L                                           | <input type="checkbox"/> <sub>1</sub> <input type="checkbox"/> <sub>2</sub> <input type="checkbox"/> <sub>3</sub> <input type="checkbox"/> <sub>4</sub> |   |   |   |                             |
| HbA1c                     |                | mg/dl                                            | <input type="checkbox"/> <sub>1</sub> <input type="checkbox"/> <sub>2</sub> <input type="checkbox"/> <sub>3</sub> <input type="checkbox"/> <sub>4</sub> |   |   |   |                             |
| Fasting insulin           |                | μU/ml                                            | <input type="checkbox"/> <sub>1</sub> <input type="checkbox"/> <sub>2</sub> <input type="checkbox"/> <sub>3</sub> <input type="checkbox"/> <sub>4</sub> |   |   |   |                             |
| <b>Blood lipid</b>        |                | <b>Report date:</b> 201 _ Year _ _ Month _ _ Day |                                                                                                                                                         |   |   |   |                             |
| HDL-C                     |                | mmol/L                                           | <input type="checkbox"/> <sub>1</sub> <input type="checkbox"/> <sub>2</sub> <input type="checkbox"/> <sub>3</sub> <input type="checkbox"/> <sub>4</sub> |   |   |   |                             |
| LDL-C                     |                | mmol/L                                           | <input type="checkbox"/> <sub>1</sub> <input type="checkbox"/> <sub>2</sub> <input type="checkbox"/> <sub>3</sub> <input type="checkbox"/> <sub>4</sub> |   |   |   |                             |
| TG                        |                | mmol/L                                           | <input type="checkbox"/> <sub>1</sub> <input type="checkbox"/> <sub>2</sub> <input type="checkbox"/> <sub>3</sub> <input type="checkbox"/> <sub>4</sub> |   |   |   |                             |
| CH                        |                | mmol/L                                           | <input type="checkbox"/> <sub>1</sub> <input type="checkbox"/> <sub>2</sub> <input type="checkbox"/> <sub>3</sub> <input type="checkbox"/> <sub>4</sub> |   |   |   |                             |
| <b>C-reactive protein</b> |                | <b>Report date:</b> 201 _ Year _ _ Month _ _ Day |                                                                                                                                                         |   |   |   |                             |
| CRP                       |                | mg/L                                             | <input type="checkbox"/> <sub>1</sub> <input type="checkbox"/> <sub>2</sub> <input type="checkbox"/> <sub>3</sub> <input type="checkbox"/> <sub>4</sub> |   |   |   |                             |

\* Clinical significance judgment: (1) normal (2) abnormal but no clinical significance (3) abnormal and clinical significance (4) not investigated.

|                       |                           |                                |                                               |
|-----------------------|---------------------------|--------------------------------|-----------------------------------------------|
| Visit7<br>38Week±4Day | Drug number<br> _ _ _ _ _ | Patient initials<br> _ _ _ _ _ | Date of visit<br>201 _ Year _ _ Month _ _ Day |
|-----------------------|---------------------------|--------------------------------|-----------------------------------------------|

**Is the test drug returned?**

- \_0 No→Unreturned reason: \_2 Take all \_3 Lost \_4 Other\_\_\_\_\_
- \_1 Yes→ Ginkgo biloba drop pills |\_|\_|\_|\_|\_| pills

**Is there a combined medication?**

- \_0 No
- \_1 Yes→Please fill out the “Combined Medication Record Form” on page 47.

**Are there any adverse events?**

- \_0 No
- \_1 Yes→Please fill out the “Adverse Event Record Form” on page 48 in detail.

**Is there an unscheduled laboratory check?**

- \_0 No
- \_1 Yes→Record the results to “Unplanned Laboratory Inspection Results” on page 49

**Researcher's signature:** \_\_\_\_\_ **Date:** 201|\_|Year|\_|\_|Month|\_|\_|Day

|                       |                           |                                |                                               |
|-----------------------|---------------------------|--------------------------------|-----------------------------------------------|
| Visit8<br>40Week±4Day | Drug number<br> _ _ _ _ _ | Patient initials<br> _ _ _ _ _ | Date of visit<br>201 _ Year _ _ Month _ _ Day |
|-----------------------|---------------------------|--------------------------------|-----------------------------------------------|

Seattle Angina Questionnaire(SAQ)

Score \*: |\_|\_|\_|\_|\_|

1. In the past 4 weeks, the following restrictions have been caused by chest pain, chest tightness and angina:

|                                                  | Severely restricted                   | Moderately restricted                 | Mildly restricted                     | Slightly restricted                   | Unrestricted                          | Limited for other reasons             |
|--------------------------------------------------|---------------------------------------|---------------------------------------|---------------------------------------|---------------------------------------|---------------------------------------|---------------------------------------|
| Dress yourself                                   | <input type="checkbox"/> <sub>1</sub> | <input type="checkbox"/> <sub>2</sub> | <input type="checkbox"/> <sub>3</sub> | <input type="checkbox"/> <sub>4</sub> | <input type="checkbox"/> <sub>5</sub> | <input type="checkbox"/> <sub>6</sub> |
| Indoor walk                                      | <input type="checkbox"/> <sub>1</sub> | <input type="checkbox"/> <sub>2</sub> | <input type="checkbox"/> <sub>3</sub> | <input type="checkbox"/> <sub>4</sub> | <input type="checkbox"/> <sub>5</sub> | <input type="checkbox"/> <sub>6</sub> |
| Take a shower                                    | <input type="checkbox"/> <sub>1</sub> | <input type="checkbox"/> <sub>2</sub> | <input type="checkbox"/> <sub>3</sub> | <input type="checkbox"/> <sub>4</sub> | <input type="checkbox"/> <sub>5</sub> | <input type="checkbox"/> <sub>6</sub> |
| Climbing or stairway<br>(three floors, non-stop) | <input type="checkbox"/> <sub>1</sub> | <input type="checkbox"/> <sub>2</sub> | <input type="checkbox"/> <sub>3</sub> | <input type="checkbox"/> <sub>4</sub> | <input type="checkbox"/> <sub>5</sub> | <input type="checkbox"/> <sub>6</sub> |
| Outdoor activities or pick up                    | <input type="checkbox"/> <sub>1</sub> | <input type="checkbox"/> <sub>2</sub> | <input type="checkbox"/> <sub>3</sub> | <input type="checkbox"/> <sub>4</sub> | <input type="checkbox"/> <sub>5</sub> | <input type="checkbox"/> <sub>6</sub> |
| Walk lightly (one kilometer)                     | <input type="checkbox"/> <sub>1</sub> | <input type="checkbox"/> <sub>2</sub> | <input type="checkbox"/> <sub>3</sub> | <input type="checkbox"/> <sub>4</sub> | <input type="checkbox"/> <sub>5</sub> | <input type="checkbox"/> <sub>6</sub> |
| Jogging (one kilometer)                          | <input type="checkbox"/> <sub>1</sub> | <input type="checkbox"/> <sub>2</sub> | <input type="checkbox"/> <sub>3</sub> | <input type="checkbox"/> <sub>4</sub> | <input type="checkbox"/> <sub>5</sub> | <input type="checkbox"/> <sub>6</sub> |
| Lift or move heavy objects                       | <input type="checkbox"/> <sub>1</sub> | <input type="checkbox"/> <sub>2</sub> | <input type="checkbox"/> <sub>3</sub> | <input type="checkbox"/> <sub>4</sub> | <input type="checkbox"/> <sub>5</sub> | <input type="checkbox"/> <sub>6</sub> |
| Strenuous exercise (such as swimming or playing) | <input type="checkbox"/> <sub>1</sub> | <input type="checkbox"/> <sub>2</sub> | <input type="checkbox"/> <sub>3</sub> | <input type="checkbox"/> <sub>4</sub> | <input type="checkbox"/> <sub>5</sub> | <input type="checkbox"/> <sub>6</sub> |

2. Compared with 4 weeks ago, when doing the maximum intensity of activity, chest pain, chest tightness and angina pectoris:

<sub>1</sub> obviously increase <sub>2</sub> Slight increase <sub>3</sub> the same <sub>4</sub> Minor reduction <sub>5</sub> obviously decrease

3. The average number of episodes of chest pain, chest tightness, and angina in the past 4 weeks:

<sub>1</sub> ≥four times/day <sub>2</sub> One-three times/day <sub>3</sub> ≥three times/week <sub>4</sub> one-two times/week

<sub>5</sub> < 1 time/week <sub>6</sub> no episode

4. The average number of nitro drugs (such as nitroglycerin) in chest pain, chest tightness, and angina pectoris over the past 4 weeks:

<sub>1</sub> ≥four times/day <sub>2</sub> One-three times/day <sub>3</sub> ≥three times/week <sub>4</sub> one-two times/week

<sub>5</sub> < 1 time/week <sub>6</sub> no episode

5. Due to chest pain, chest tightness and angina pectoris, follow the doctor's advice:

<sub>1</sub> Serious <sub>2</sub> Moderate <sub>3</sub> Minor <sub>4</sub> Very little <sub>5</sub> No <sub>6</sub> Doctor did not administer

6. Satisfaction with various measures for treating chest pain, chest tightness and angina:

<sub>1</sub> Dissatisfied <sub>2</sub> Most dissatisfied <sub>3</sub> Partially satisfied <sub>4</sub> Most satisfied <sub>5</sub> Highly satisfied

7. Satisfaction with the doctor's explanation for chest pain, chest tightness and angina:

<sub>1</sub> Dissatisfied <sub>2</sub> Most dissatisfied <sub>3</sub> Partially satisfied <sub>4</sub> Most satisfied <sub>5</sub> Highly satisfied

8. Overall, satisfaction with the current treatment of chest pain, chest tightness and angina:

<sub>1</sub> Dissatisfied <sub>2</sub> Most dissatisfied <sub>3</sub> Partially satisfied <sub>4</sub> Most satisfied <sub>5</sub> Highly satisfied

|                       |                           |                                |                                               |
|-----------------------|---------------------------|--------------------------------|-----------------------------------------------|
| Visit8<br>40Week±4Day | Drug number<br> _ _ _ _ _ | Patient initials<br> _ _ _ _ _ | Date of visit<br>201 _ Year _ _ Month _ _ Day |
|-----------------------|---------------------------|--------------------------------|-----------------------------------------------|

9. In the past 4 weeks, chest pain, chest tightness and angina have affected the level of fun in life:

<sub>1</sub> Dissatisfied <sub>2</sub> Most dissatisfied <sub>3</sub> Partially satisfied <sub>4</sub> Most satisfied <sub>5</sub> Highly satisfied

10. If you have chest pain, chest tightness and angina in your future life, how would you feel?

<sub>1</sub> Dissatisfied <sub>2</sub> Most dissatisfied <sub>3</sub> Partially satisfied <sub>4</sub> Most satisfied <sub>5</sub> Highly satisfied

11. Concerns about heart attack and sudden death:

<sub>1</sub> Always worried <sub>2</sub> Frequently worried <sub>3</sub> Sometimes worried <sub>4</sub> Very little worried <sub>5</sub> Never worry

\* The Seattle Angina Scale is divided into 5 items and 19 items: Physical activity limitation (PL, question 1), angina stable state (AS, question 2), angina pectoris (AF, question 3-4), treatment satisfaction (TS), question 5-8), disease cognition (DP, question 9-11). After scoring the 19 items of the 5 major items one by one, each score is forwarded. The standard score = (actual score - the lowest score in this aspect) / (the highest score in this aspect - the lowest score in this aspect) ✖100, the higher the score, the better the quality of life and the functional state of the patient.

### Angina pectoris symptom score

Score \*: |\_|\_|\_|\_|\_|

|                          |                                          |                                                                                                                                                                                                                                                                                              |                                                                                                                                                                                                                                                                             |                                                                                                                                                                                                                                                                                                                 |
|--------------------------|------------------------------------------|----------------------------------------------------------------------------------------------------------------------------------------------------------------------------------------------------------------------------------------------------------------------------------------------|-----------------------------------------------------------------------------------------------------------------------------------------------------------------------------------------------------------------------------------------------------------------------------|-----------------------------------------------------------------------------------------------------------------------------------------------------------------------------------------------------------------------------------------------------------------------------------------------------------------|
| Number of angina attacks | <input type="checkbox"/> <sub>0</sub> No | <input type="checkbox"/> <sub>2</sub> 2-6 episodes per week                                                                                                                                                                                                                                  | <input type="checkbox"/> <sub>4</sub> 1-3 times a day                                                                                                                                                                                                                       | <input type="checkbox"/> <sub>6</sub> more than 4 episodes per day                                                                                                                                                                                                                                              |
| Angina duration          | <input type="checkbox"/> <sub>0</sub> No | <input type="checkbox"/> <sub>2</sub> Each time the pain lasts less than or equal to 5 minutes                                                                                                                                                                                               | <input type="checkbox"/> <sub>4</sub> Each time the pain lasts longer than 5 minutes and less than 10                                                                                                                                                                       | <input type="checkbox"/> <sub>6</sub> Each time the pain lasts for 10 minutes or more                                                                                                                                                                                                                           |
| Angina pain level        | <input type="checkbox"/> <sub>0</sub> No | <input type="checkbox"/> <sub>2</sub> Physical activity that is heavier than daily activities causes angina and daily activities are asymptomatic. Activities that can cause angina, such as trotting on the ground, fast or holding heavy objects on the third floor, up steep slopes, etc. | <input type="checkbox"/> <sub>4</sub> Daily physical activity causes angina and daily activities are slightly limited. Activities that can cause angina, such as walking 3-4 stations (3-4 miles) at normal speed under normal conditions, on the third floor, uphill, etc. | <input type="checkbox"/> <sub>6</sub> Lighter physical activity than daily activities causes angina and daily activities are significantly limited. Activities that can cause angina, such as walking 1-2 stations (1-2 miles) at normal speed under normal conditions, on the second floor, gentle slope, etc. |
| Nitroglycerin dosage     | <input type="checkbox"/> <sub>0</sub> No | <input type="checkbox"/> <sub>2</sub> 1-4 tablets per week                                                                                                                                                                                                                                   | <input type="checkbox"/> <sub>4</sub> 5-9 tablets per week                                                                                                                                                                                                                  | <input type="checkbox"/> <sub>6</sub> Take more than 10 tablets a week                                                                                                                                                                                                                                          |

|                       |                           |                                |                                               |
|-----------------------|---------------------------|--------------------------------|-----------------------------------------------|
| Visit8<br>40Week±4Day | Drug number<br> _ _ _ _ _ | Patient initials<br> _ _ _ _ _ | Date of visit<br>201 _ Year _ _ Month _ _ Day |
|-----------------------|---------------------------|--------------------------------|-----------------------------------------------|

### Laboratory inspection

| Indicator                 | Measured Value | Unit                                             | Clinical significance *                                                                                                                                 |   |   |   | Anomalous cause explanation |
|---------------------------|----------------|--------------------------------------------------|---------------------------------------------------------------------------------------------------------------------------------------------------------|---|---|---|-----------------------------|
|                           |                |                                                  | 1                                                                                                                                                       | 2 | 3 | 4 |                             |
| <b>Blood sugar</b>        |                | <b>Report date:</b> 201 _ Year _ _ Month _ _ Day |                                                                                                                                                         |   |   |   |                             |
| FPG                       |                | mmol/L                                           | <input type="checkbox"/> <sub>1</sub> <input type="checkbox"/> <sub>2</sub> <input type="checkbox"/> <sub>3</sub> <input type="checkbox"/> <sub>4</sub> |   |   |   |                             |
| 2hPG                      |                | mmol/L                                           | <input type="checkbox"/> <sub>1</sub> <input type="checkbox"/> <sub>2</sub> <input type="checkbox"/> <sub>3</sub> <input type="checkbox"/> <sub>4</sub> |   |   |   |                             |
| HbA1c                     |                | mg/dl                                            | <input type="checkbox"/> <sub>1</sub> <input type="checkbox"/> <sub>2</sub> <input type="checkbox"/> <sub>3</sub> <input type="checkbox"/> <sub>4</sub> |   |   |   |                             |
| Fasting insulin           |                | μU/ml                                            | <input type="checkbox"/> <sub>1</sub> <input type="checkbox"/> <sub>2</sub> <input type="checkbox"/> <sub>3</sub> <input type="checkbox"/> <sub>4</sub> |   |   |   |                             |
| <b>Blood lipid</b>        |                | <b>Report date:</b> 201 _ Year _ _ Month _ _ Day |                                                                                                                                                         |   |   |   |                             |
| HDL-C                     |                | mmol/L                                           | <input type="checkbox"/> <sub>1</sub> <input type="checkbox"/> <sub>2</sub> <input type="checkbox"/> <sub>3</sub> <input type="checkbox"/> <sub>4</sub> |   |   |   |                             |
| LDL-C                     |                | mmol/L                                           | <input type="checkbox"/> <sub>1</sub> <input type="checkbox"/> <sub>2</sub> <input type="checkbox"/> <sub>3</sub> <input type="checkbox"/> <sub>4</sub> |   |   |   |                             |
| TG                        |                | mmol/L                                           | <input type="checkbox"/> <sub>1</sub> <input type="checkbox"/> <sub>2</sub> <input type="checkbox"/> <sub>3</sub> <input type="checkbox"/> <sub>4</sub> |   |   |   |                             |
| CH                        |                | mmol/L                                           | <input type="checkbox"/> <sub>1</sub> <input type="checkbox"/> <sub>2</sub> <input type="checkbox"/> <sub>3</sub> <input type="checkbox"/> <sub>4</sub> |   |   |   |                             |
| <b>C-reactive protein</b> |                | <b>Report date:</b> 201 _ Year _ _ Month _ _ Day |                                                                                                                                                         |   |   |   |                             |
| CRP                       |                | mg/L                                             | <input type="checkbox"/> <sub>1</sub> <input type="checkbox"/> <sub>2</sub> <input type="checkbox"/> <sub>3</sub> <input type="checkbox"/> <sub>4</sub> |   |   |   |                             |

\* Clinical significance judgment: (1) normal (2) abnormal but no clinical significance (3) abnormal and clinical significance (4) not investigated.

### Is there a combined medication?

- <sub>0</sub>No  
<sub>1</sub>Yes→Please fill out the “Combined Medication Record Form” on page 47.

### Are there any adverse events?

- <sub>0</sub>No  
<sub>1</sub>Yes→Please fill out the “Adverse Event Record Form” on page 48 in detail.

### Is there an unscheduled laboratory check?

- <sub>0</sub>No  
<sub>1</sub>Yes→Record the results to “Unplanned Laboratory Inspection Results” on page 49

**Release of test drug:** Ginkgo biloba drop pills 900 pills (10 bottles)

**Researcher's signature:** \_\_\_\_\_ **Date:** 201|\_|Year|\_|\_|Month|\_|\_|Day

|                       |                         |                              |                                               |
|-----------------------|-------------------------|------------------------------|-----------------------------------------------|
| Visit9<br>48Week±4Day | Drug number<br> _ _ _ _ | Patient initials<br> _ _ _ _ | Date of visit<br>201 _ Year _ _ Month _ _ Day |
|-----------------------|-------------------------|------------------------------|-----------------------------------------------|

Seattle Angina Questionnaire(SAQ)

Score \*: |\_|\_|\_|\_|

1. In the past 4 weeks, the following restrictions have been caused by chest pain, chest tightness and angina:

|                                                  | Severely restricted                   | Moderately restricted                 | Mildly restricted                     | Slightly restricted                   | Unrestricted                          | Limited for other reasons             |
|--------------------------------------------------|---------------------------------------|---------------------------------------|---------------------------------------|---------------------------------------|---------------------------------------|---------------------------------------|
| Dress yourself                                   | <input type="checkbox"/> <sub>1</sub> | <input type="checkbox"/> <sub>2</sub> | <input type="checkbox"/> <sub>3</sub> | <input type="checkbox"/> <sub>4</sub> | <input type="checkbox"/> <sub>5</sub> | <input type="checkbox"/> <sub>6</sub> |
| Indoor walk                                      | <input type="checkbox"/> <sub>1</sub> | <input type="checkbox"/> <sub>2</sub> | <input type="checkbox"/> <sub>3</sub> | <input type="checkbox"/> <sub>4</sub> | <input type="checkbox"/> <sub>5</sub> | <input type="checkbox"/> <sub>6</sub> |
| Take a shower                                    | <input type="checkbox"/> <sub>1</sub> | <input type="checkbox"/> <sub>2</sub> | <input type="checkbox"/> <sub>3</sub> | <input type="checkbox"/> <sub>4</sub> | <input type="checkbox"/> <sub>5</sub> | <input type="checkbox"/> <sub>6</sub> |
| Climbing or stairway<br>(three floors, non-stop) | <input type="checkbox"/> <sub>1</sub> | <input type="checkbox"/> <sub>2</sub> | <input type="checkbox"/> <sub>3</sub> | <input type="checkbox"/> <sub>4</sub> | <input type="checkbox"/> <sub>5</sub> | <input type="checkbox"/> <sub>6</sub> |
| Outdoor activities or pick up                    | <input type="checkbox"/> <sub>1</sub> | <input type="checkbox"/> <sub>2</sub> | <input type="checkbox"/> <sub>3</sub> | <input type="checkbox"/> <sub>4</sub> | <input type="checkbox"/> <sub>5</sub> | <input type="checkbox"/> <sub>6</sub> |
| Walk lightly (one kilometer)                     | <input type="checkbox"/> <sub>1</sub> | <input type="checkbox"/> <sub>2</sub> | <input type="checkbox"/> <sub>3</sub> | <input type="checkbox"/> <sub>4</sub> | <input type="checkbox"/> <sub>5</sub> | <input type="checkbox"/> <sub>6</sub> |
| Jogging (one kilometer)                          | <input type="checkbox"/> <sub>1</sub> | <input type="checkbox"/> <sub>2</sub> | <input type="checkbox"/> <sub>3</sub> | <input type="checkbox"/> <sub>4</sub> | <input type="checkbox"/> <sub>5</sub> | <input type="checkbox"/> <sub>6</sub> |
| Lift or move heavy objects                       | <input type="checkbox"/> <sub>1</sub> | <input type="checkbox"/> <sub>2</sub> | <input type="checkbox"/> <sub>3</sub> | <input type="checkbox"/> <sub>4</sub> | <input type="checkbox"/> <sub>5</sub> | <input type="checkbox"/> <sub>6</sub> |
| Strenuous exercise (such as swimming or playing) | <input type="checkbox"/> <sub>1</sub> | <input type="checkbox"/> <sub>2</sub> | <input type="checkbox"/> <sub>3</sub> | <input type="checkbox"/> <sub>4</sub> | <input type="checkbox"/> <sub>5</sub> | <input type="checkbox"/> <sub>6</sub> |

2. Compared with 4 weeks ago, when doing the maximum intensity of activity, chest pain, chest tightness and angina pectoris:

<sub>1</sub> obviously increase <sub>2</sub> Slight increase <sub>3</sub> the same <sub>4</sub> Minor reduction <sub>5</sub> obviously decrease

3. The average number of episodes of chest pain, chest tightness, and angina in the past 4 weeks:

<sub>1</sub> ≥four times/day <sub>2</sub> One-three times/day <sub>3</sub> ≥three times/week <sub>4</sub> one-two times/week

<sub>5</sub> < 1 time/week <sub>6</sub> no episode

4. The average number of nitro drugs (such as nitroglycerin) in chest pain, chest tightness, and angina pectoris over the past 4 weeks:

<sub>1</sub> ≥four times/day <sub>2</sub> One-three times/day <sub>3</sub> ≥three times/week <sub>4</sub> one-two times/week

<sub>5</sub> < 1 time/week <sub>6</sub> no episode

5. Due to chest pain, chest tightness and angina pectoris, follow the doctor's advice:

<sub>1</sub> Serious <sub>2</sub> Moderate <sub>3</sub> Minor <sub>4</sub> Very little <sub>5</sub> No <sub>6</sub> Doctor did not administer

6. Satisfaction with various measures for treating chest pain, chest tightness and angina:

<sub>1</sub> Dissatisfied <sub>2</sub> Most dissatisfied <sub>3</sub> Partially satisfied <sub>4</sub> Most satisfied <sub>5</sub> Highly satisfied

7. Satisfaction with the doctor's explanation for chest pain, chest tightness and angina:

<sub>1</sub> Dissatisfied <sub>2</sub> Most dissatisfied <sub>3</sub> Partially satisfied <sub>4</sub> Most satisfied <sub>5</sub> Highly satisfied

8. Overall, satisfaction with the current treatment of chest pain, chest tightness and angina:

<sub>1</sub> Dissatisfied <sub>2</sub> Most dissatisfied <sub>3</sub> Partially satisfied <sub>4</sub> Most satisfied <sub>5</sub> Highly satisfied

|                       |                         |                              |                                               |
|-----------------------|-------------------------|------------------------------|-----------------------------------------------|
| Visit9<br>48Week±4Day | Drug number<br> _ _ _ _ | Patient initials<br> _ _ _ _ | Date of visit<br>201 _ Year _ _ Month _ _ Day |
|-----------------------|-------------------------|------------------------------|-----------------------------------------------|

9. In the past 4 weeks, chest pain, chest tightness and angina have affected the level of fun in life:

<sub>1</sub> Dissatisfied <sub>2</sub> Most dissatisfied <sub>3</sub> Partially satisfied <sub>4</sub> Most satisfied <sub>5</sub> Highly satisfied

10. If you have chest pain, chest tightness and angina in your future life, how would you feel?

<sub>1</sub> Dissatisfied <sub>2</sub> Most dissatisfied <sub>3</sub> Partially satisfied <sub>4</sub> Most satisfied <sub>5</sub> Highly satisfied

11. Concerns about heart attack and sudden death:

<sub>1</sub> Always worried <sub>2</sub> Frequently worried <sub>3</sub> Sometimes worried <sub>4</sub> Very little worried <sub>5</sub> Never worry

\* The Seattle Angina Scale is divided into 5 items and 19 items: Physical activity limitation (PL, question 1), angina stable state (AS, question 2), angina pectoris (AF, question 3-4), treatment satisfaction (TS), question 5-8), disease cognition (DP, question 9-11). After scoring the 19 items of the 5 major items one by one, each score is forwarded. The standard score = (actual score - the lowest score in this aspect) / (the highest score in this aspect - the lowest score in this aspect) ✖100, the higher the score, the better the quality of life and the functional state of the patient.

### Angina pectoris symptom score

Score \*: |\_|\_|\_|\_|

|                          |                                          |                                                                                                                                                                                                                                                                                              |                                                                                                                                                                                                                                                                             |                                                                                                                                                                                                                                                                                                                 |
|--------------------------|------------------------------------------|----------------------------------------------------------------------------------------------------------------------------------------------------------------------------------------------------------------------------------------------------------------------------------------------|-----------------------------------------------------------------------------------------------------------------------------------------------------------------------------------------------------------------------------------------------------------------------------|-----------------------------------------------------------------------------------------------------------------------------------------------------------------------------------------------------------------------------------------------------------------------------------------------------------------|
| Number of angina attacks | <input type="checkbox"/> <sub>0</sub> No | <input type="checkbox"/> <sub>2</sub> 2-6 episodes per week                                                                                                                                                                                                                                  | <input type="checkbox"/> <sub>4</sub> 1-3 times a day                                                                                                                                                                                                                       | <input type="checkbox"/> <sub>6</sub> more than 4 episodes per day                                                                                                                                                                                                                                              |
| Angina duration          | <input type="checkbox"/> <sub>0</sub> No | <input type="checkbox"/> <sub>2</sub> Each time the pain lasts less than or equal to 5 minutes                                                                                                                                                                                               | <input type="checkbox"/> <sub>4</sub> Each time the pain lasts longer than 5 minutes and less than 10                                                                                                                                                                       | <input type="checkbox"/> <sub>6</sub> Each time the pain lasts for 10 minutes or more                                                                                                                                                                                                                           |
| Angina pain level        | <input type="checkbox"/> <sub>0</sub> No | <input type="checkbox"/> <sub>2</sub> Physical activity that is heavier than daily activities causes angina and daily activities are asymptomatic. Activities that can cause angina, such as trotting on the ground, fast or holding heavy objects on the third floor, up steep slopes, etc. | <input type="checkbox"/> <sub>4</sub> Daily physical activity causes angina and daily activities are slightly limited. Activities that can cause angina, such as walking 3-4 stations (3-4 miles) at normal speed under normal conditions, on the third floor, uphill, etc. | <input type="checkbox"/> <sub>6</sub> Lighter physical activity than daily activities causes angina and daily activities are significantly limited. Activities that can cause angina, such as walking 1-2 stations (1-2 miles) at normal speed under normal conditions, on the second floor, gentle slope, etc. |
| Nitroglycerin dosage     | <input type="checkbox"/> <sub>0</sub> No | <input type="checkbox"/> <sub>2</sub> 1-4 tablets per week                                                                                                                                                                                                                                   | <input type="checkbox"/> <sub>4</sub> 5-9 tablets per week                                                                                                                                                                                                                  | <input type="checkbox"/> <sub>6</sub> Take more than 10 tablets a week                                                                                                                                                                                                                                          |

|                       |                         |                              |                                               |
|-----------------------|-------------------------|------------------------------|-----------------------------------------------|
| Visit9<br>48Week±4Day | Drug number<br> _ _ _ _ | Patient initials<br> _ _ _ _ | Date of visit<br>201 _ Year _ _ Month _ _ Day |
|-----------------------|-------------------------|------------------------------|-----------------------------------------------|

### Laboratory inspection

| Indicator                 | Measured Value | Unit                                             | Clinical significance *                                                                                                                                 |   |   |   | Anomalous cause explanation |
|---------------------------|----------------|--------------------------------------------------|---------------------------------------------------------------------------------------------------------------------------------------------------------|---|---|---|-----------------------------|
|                           |                |                                                  | 1                                                                                                                                                       | 2 | 3 | 4 |                             |
| <b>Blood sugar</b>        |                | <b>Report date:</b> 201 _ Year _ _ Month _ _ Day |                                                                                                                                                         |   |   |   |                             |
| FPG                       |                | mmol/L                                           | <input type="checkbox"/> <sub>1</sub> <input type="checkbox"/> <sub>2</sub> <input type="checkbox"/> <sub>3</sub> <input type="checkbox"/> <sub>4</sub> |   |   |   |                             |
| 2hPG                      |                | mmol/L                                           | <input type="checkbox"/> <sub>1</sub> <input type="checkbox"/> <sub>2</sub> <input type="checkbox"/> <sub>3</sub> <input type="checkbox"/> <sub>4</sub> |   |   |   |                             |
| HbA1c                     |                | mg/dl                                            | <input type="checkbox"/> <sub>1</sub> <input type="checkbox"/> <sub>2</sub> <input type="checkbox"/> <sub>3</sub> <input type="checkbox"/> <sub>4</sub> |   |   |   |                             |
| Fasting insulin           |                | μU/ml                                            | <input type="checkbox"/> <sub>1</sub> <input type="checkbox"/> <sub>2</sub> <input type="checkbox"/> <sub>3</sub> <input type="checkbox"/> <sub>4</sub> |   |   |   |                             |
| <b>Blood lipid</b>        |                | <b>Report date:</b> 201 _ Year _ _ Month _ _ Day |                                                                                                                                                         |   |   |   |                             |
| HDL-C                     |                | mmol/L                                           | <input type="checkbox"/> <sub>1</sub> <input type="checkbox"/> <sub>2</sub> <input type="checkbox"/> <sub>3</sub> <input type="checkbox"/> <sub>4</sub> |   |   |   |                             |
| LDL-C                     |                | mmol/L                                           | <input type="checkbox"/> <sub>1</sub> <input type="checkbox"/> <sub>2</sub> <input type="checkbox"/> <sub>3</sub> <input type="checkbox"/> <sub>4</sub> |   |   |   |                             |
| TG                        |                | mmol/L                                           | <input type="checkbox"/> <sub>1</sub> <input type="checkbox"/> <sub>2</sub> <input type="checkbox"/> <sub>3</sub> <input type="checkbox"/> <sub>4</sub> |   |   |   |                             |
| CH                        |                | mmol/L                                           | <input type="checkbox"/> <sub>1</sub> <input type="checkbox"/> <sub>2</sub> <input type="checkbox"/> <sub>3</sub> <input type="checkbox"/> <sub>4</sub> |   |   |   |                             |
| <b>C-reactive protein</b> |                | <b>Report date:</b> 201 _ Year _ _ Month _ _ Day |                                                                                                                                                         |   |   |   |                             |
| CRP                       |                | mg/L                                             | <input type="checkbox"/> <sub>1</sub> <input type="checkbox"/> <sub>2</sub> <input type="checkbox"/> <sub>3</sub> <input type="checkbox"/> <sub>4</sub> |   |   |   |                             |

\* Clinical significance judgment: (1) normal (2) abnormal but no clinical significance (3) abnormal and clinical significance (4) not investigated.



|                       |                           |                                |                                               |
|-----------------------|---------------------------|--------------------------------|-----------------------------------------------|
| Visit9<br>48Week±4Day | Drug number<br> _ _ _ _ _ | Patient initials<br> _ _ _ _ _ | Date of visit<br>201 _ Year _ _ Month _ _ Day |
|-----------------------|---------------------------|--------------------------------|-----------------------------------------------|

**Is the test drug returned?**

- <sub>0</sub>No→Unreturned reason: <sub>2</sub> Take all <sub>3</sub> Lost <sub>4</sub> Other\_\_\_\_\_
- <sub>1</sub>Yes→ Ginkgo biloba drop pills |\_|\_|\_|\_|\_| pills

**Is there a combined medication?**

- <sub>0</sub>No
- <sub>1</sub>Yes→Please fill out the “Combined Medication Record Form” on page 47.

**Are there any adverse events?**

- <sub>0</sub>No
- <sub>1</sub>Yes→Please fill out the “Adverse Event Record Form” on page 48 in detail.

**Is there an unscheduled laboratory check?**

- <sub>0</sub>No
- <sub>1</sub>Yes→Record the results to “Unplanned Laboratory Inspection Results” on page 49

**Researcher's signature:** \_\_\_\_\_ **Date:** 201|\_|Year|\_|\_|Month|\_|\_|Day

|                        |                         |                              |                                               |
|------------------------|-------------------------|------------------------------|-----------------------------------------------|
| Visit10<br>50Week±4Day | Drug number<br> _ _ _ _ | Patient initials<br> _ _ _ _ | Date of visit<br>201 _ Year _ _ Month _ _ Day |
|------------------------|-------------------------|------------------------------|-----------------------------------------------|

Seattle Angina Questionnaire(SAQ)

Score \*: |\_|\_|\_|\_|

1. In the past 4 weeks, the following restrictions have been caused by chest pain, chest tightness and angina:

|                                                  | Severely restricted                   | Moderately restricted                 | Mildly restricted                     | Slightly restricted                   | Unrestricted                          | Limited for other reasons             |
|--------------------------------------------------|---------------------------------------|---------------------------------------|---------------------------------------|---------------------------------------|---------------------------------------|---------------------------------------|
| Dress yourself                                   | <input type="checkbox"/> <sub>1</sub> | <input type="checkbox"/> <sub>2</sub> | <input type="checkbox"/> <sub>3</sub> | <input type="checkbox"/> <sub>4</sub> | <input type="checkbox"/> <sub>5</sub> | <input type="checkbox"/> <sub>6</sub> |
| Indoor walk                                      | <input type="checkbox"/> <sub>1</sub> | <input type="checkbox"/> <sub>2</sub> | <input type="checkbox"/> <sub>3</sub> | <input type="checkbox"/> <sub>4</sub> | <input type="checkbox"/> <sub>5</sub> | <input type="checkbox"/> <sub>6</sub> |
| Take a shower                                    | <input type="checkbox"/> <sub>1</sub> | <input type="checkbox"/> <sub>2</sub> | <input type="checkbox"/> <sub>3</sub> | <input type="checkbox"/> <sub>4</sub> | <input type="checkbox"/> <sub>5</sub> | <input type="checkbox"/> <sub>6</sub> |
| Climbing or stairway<br>(three floors, non-stop) | <input type="checkbox"/> <sub>1</sub> | <input type="checkbox"/> <sub>2</sub> | <input type="checkbox"/> <sub>3</sub> | <input type="checkbox"/> <sub>4</sub> | <input type="checkbox"/> <sub>5</sub> | <input type="checkbox"/> <sub>6</sub> |
| Outdoor activities or pick up                    | <input type="checkbox"/> <sub>1</sub> | <input type="checkbox"/> <sub>2</sub> | <input type="checkbox"/> <sub>3</sub> | <input type="checkbox"/> <sub>4</sub> | <input type="checkbox"/> <sub>5</sub> | <input type="checkbox"/> <sub>6</sub> |
| Walk lightly (one kilometer)                     | <input type="checkbox"/> <sub>1</sub> | <input type="checkbox"/> <sub>2</sub> | <input type="checkbox"/> <sub>3</sub> | <input type="checkbox"/> <sub>4</sub> | <input type="checkbox"/> <sub>5</sub> | <input type="checkbox"/> <sub>6</sub> |
| Jogging (one kilometer)                          | <input type="checkbox"/> <sub>1</sub> | <input type="checkbox"/> <sub>2</sub> | <input type="checkbox"/> <sub>3</sub> | <input type="checkbox"/> <sub>4</sub> | <input type="checkbox"/> <sub>5</sub> | <input type="checkbox"/> <sub>6</sub> |
| Lift or move heavy objects                       | <input type="checkbox"/> <sub>1</sub> | <input type="checkbox"/> <sub>2</sub> | <input type="checkbox"/> <sub>3</sub> | <input type="checkbox"/> <sub>4</sub> | <input type="checkbox"/> <sub>5</sub> | <input type="checkbox"/> <sub>6</sub> |
| Strenuous exercise (such as swimming or playing) | <input type="checkbox"/> <sub>1</sub> | <input type="checkbox"/> <sub>2</sub> | <input type="checkbox"/> <sub>3</sub> | <input type="checkbox"/> <sub>4</sub> | <input type="checkbox"/> <sub>5</sub> | <input type="checkbox"/> <sub>6</sub> |

2. Compared with 4 weeks ago, when doing the maximum intensity of activity, chest pain, chest tightness and angina pectoris:

<sub>1</sub> obviously increase <sub>2</sub> Slight increase <sub>3</sub> the same <sub>4</sub> Minor reduction <sub>5</sub> obviously decrease

3. The average number of episodes of chest pain, chest tightness, and angina in the past 4 weeks:

<sub>1</sub> ≥four times/day <sub>2</sub> One-three times/day <sub>3</sub> ≥three times/week <sub>4</sub> one-two times/week

<sub>5</sub> < 1 time/week <sub>6</sub> no episode

4. The average number of nitro drugs (such as nitroglycerin) in chest pain, chest tightness, and angina pectoris over the past 4 weeks:

<sub>1</sub> ≥four times/day <sub>2</sub> One-three times/day <sub>3</sub> ≥three times/week <sub>4</sub> one-two times/week

<sub>5</sub> < 1 time/week <sub>6</sub> no episode

5. Due to chest pain, chest tightness and angina pectoris, follow the doctor's advice:

<sub>1</sub> Serious <sub>2</sub> Moderate <sub>3</sub> Minor <sub>4</sub> Very little <sub>5</sub> No <sub>6</sub> Doctor did not administer

6. Satisfaction with various measures for treating chest pain, chest tightness and angina:

<sub>1</sub> Dissatisfied <sub>2</sub> Most dissatisfied <sub>3</sub> Partially satisfied <sub>4</sub> Most satisfied <sub>5</sub> Highly satisfied

7. Satisfaction with the doctor's explanation for chest pain, chest tightness and angina:

<sub>1</sub> Dissatisfied <sub>2</sub> Most dissatisfied <sub>3</sub> Partially satisfied <sub>4</sub> Most satisfied <sub>5</sub> Highly satisfied

8. Overall, satisfaction with the current treatment of chest pain, chest tightness and angina:

<sub>1</sub> Dissatisfied <sub>2</sub> Most dissatisfied <sub>3</sub> Partially satisfied <sub>4</sub> Most satisfied <sub>5</sub> Highly satisfied

|                        |                         |                              |                                               |
|------------------------|-------------------------|------------------------------|-----------------------------------------------|
| Visit10<br>50Week±4Day | Drug number<br> _ _ _ _ | Patient initials<br> _ _ _ _ | Date of visit<br>201 _ Year _ _ Month _ _ Day |
|------------------------|-------------------------|------------------------------|-----------------------------------------------|

9. In the past 4 weeks, chest pain, chest tightness and angina have affected the level of fun in life:

<sub>1</sub> Dissatisfied <sub>2</sub> Most dissatisfied <sub>3</sub> Partially satisfied <sub>4</sub> Most satisfied <sub>5</sub> Highly satisfied

10. If you have chest pain, chest tightness and angina in your future life, how would you feel?

<sub>1</sub> Dissatisfied <sub>2</sub> Most dissatisfied <sub>3</sub> Partially satisfied <sub>4</sub> Most satisfied <sub>5</sub> Highly satisfied

11. Concerns about heart attack and sudden death:

<sub>1</sub> Always worried <sub>2</sub> Frequently worried <sub>3</sub> Sometimes worried <sub>4</sub> Very little worried <sub>5</sub> Never worry

\* The Seattle Angina Scale is divided into 5 items and 19 items: Physical activity limitation (PL, question 1), angina stable state (AS, question 2), angina pectoris (AF, question 3-4), treatment satisfaction (TS), question 5-8), disease cognition (DP, question 9-11). After scoring the 19 items of the 5 major items one by one, each score is forwarded. The standard score = (actual score - the lowest score in this aspect) / (the highest score in this aspect - the lowest score in this aspect) ✖ 100, the higher the score, the better the quality of life and the functional state of the patient.

### Angina pectoris symptom score

Score \*: |\_|\_|\_|\_|

|                          |                                          |                                                                                                                                                                                                                                                                                              |                                                                                                                                                                                                                                                                             |                                                                                                                                                                                                                                                                                                                 |
|--------------------------|------------------------------------------|----------------------------------------------------------------------------------------------------------------------------------------------------------------------------------------------------------------------------------------------------------------------------------------------|-----------------------------------------------------------------------------------------------------------------------------------------------------------------------------------------------------------------------------------------------------------------------------|-----------------------------------------------------------------------------------------------------------------------------------------------------------------------------------------------------------------------------------------------------------------------------------------------------------------|
| Number of angina attacks | <input type="checkbox"/> <sub>0</sub> No | <input type="checkbox"/> <sub>2</sub> 2-6 episodes per week                                                                                                                                                                                                                                  | <input type="checkbox"/> <sub>4</sub> 1-3 times a day                                                                                                                                                                                                                       | <input type="checkbox"/> <sub>6</sub> more than 4 episodes per day                                                                                                                                                                                                                                              |
| Angina duration          | <input type="checkbox"/> <sub>0</sub> No | <input type="checkbox"/> <sub>2</sub> Each time the pain lasts less than or equal to 5 minutes                                                                                                                                                                                               | <input type="checkbox"/> <sub>4</sub> Each time the pain lasts longer than 5 minutes and less than 10                                                                                                                                                                       | <input type="checkbox"/> <sub>6</sub> Each time the pain lasts for 10 minutes or more                                                                                                                                                                                                                           |
| Angina pain level        | <input type="checkbox"/> <sub>0</sub> No | <input type="checkbox"/> <sub>2</sub> Physical activity that is heavier than daily activities causes angina and daily activities are asymptomatic. Activities that can cause angina, such as trotting on the ground, fast or holding heavy objects on the third floor, up steep slopes, etc. | <input type="checkbox"/> <sub>4</sub> Daily physical activity causes angina and daily activities are slightly limited. Activities that can cause angina, such as walking 3-4 stations (3-4 miles) at normal speed under normal conditions, on the third floor, uphill, etc. | <input type="checkbox"/> <sub>6</sub> Lighter physical activity than daily activities causes angina and daily activities are significantly limited. Activities that can cause angina, such as walking 1-2 stations (1-2 miles) at normal speed under normal conditions, on the second floor, gentle slope, etc. |
| Nitroglycerin dosage     | <input type="checkbox"/> <sub>0</sub> No | <input type="checkbox"/> <sub>2</sub> 1-4 tablets per week                                                                                                                                                                                                                                   | <input type="checkbox"/> <sub>4</sub> 5-9 tablets per week                                                                                                                                                                                                                  | <input type="checkbox"/> <sub>6</sub> Take more than 10 tablets a week                                                                                                                                                                                                                                          |

|                        |                         |                              |                                               |
|------------------------|-------------------------|------------------------------|-----------------------------------------------|
| Visit10<br>50Week±4Day | Drug number<br> _ _ _ _ | Patient initials<br> _ _ _ _ | Date of visit<br>201 _ Year _ _ Month _ _ Day |
|------------------------|-------------------------|------------------------------|-----------------------------------------------|

### Laboratory inspection

| Indicator                 | Measured Value | Unit                                             | Clinical significance *                                                                                                                                 |   |   |   | Anomalous cause explanation |
|---------------------------|----------------|--------------------------------------------------|---------------------------------------------------------------------------------------------------------------------------------------------------------|---|---|---|-----------------------------|
|                           |                |                                                  | 1                                                                                                                                                       | 2 | 3 | 4 |                             |
| <b>Blood sugar</b>        |                | <b>Report date:</b> 201 _ Year _ _ Month _ _ Day |                                                                                                                                                         |   |   |   |                             |
| FPG                       |                | mmol/L                                           | <input type="checkbox"/> <sub>1</sub> <input type="checkbox"/> <sub>2</sub> <input type="checkbox"/> <sub>3</sub> <input type="checkbox"/> <sub>4</sub> |   |   |   |                             |
| 2hPG                      |                | mmol/L                                           | <input type="checkbox"/> <sub>1</sub> <input type="checkbox"/> <sub>2</sub> <input type="checkbox"/> <sub>3</sub> <input type="checkbox"/> <sub>4</sub> |   |   |   |                             |
| HbA1c                     |                | mg/dl                                            | <input type="checkbox"/> <sub>1</sub> <input type="checkbox"/> <sub>2</sub> <input type="checkbox"/> <sub>3</sub> <input type="checkbox"/> <sub>4</sub> |   |   |   |                             |
| Fasting insulin           |                | μU/ml                                            | <input type="checkbox"/> <sub>1</sub> <input type="checkbox"/> <sub>2</sub> <input type="checkbox"/> <sub>3</sub> <input type="checkbox"/> <sub>4</sub> |   |   |   |                             |
| <b>Blood lipid</b>        |                | <b>Report date:</b> 201 _ Year _ _ Month _ _ Day |                                                                                                                                                         |   |   |   |                             |
| HDL-C                     |                | mmol/L                                           | <input type="checkbox"/> <sub>1</sub> <input type="checkbox"/> <sub>2</sub> <input type="checkbox"/> <sub>3</sub> <input type="checkbox"/> <sub>4</sub> |   |   |   |                             |
| LDL-C                     |                | mmol/L                                           | <input type="checkbox"/> <sub>1</sub> <input type="checkbox"/> <sub>2</sub> <input type="checkbox"/> <sub>3</sub> <input type="checkbox"/> <sub>4</sub> |   |   |   |                             |
| TG                        |                | mmol/L                                           | <input type="checkbox"/> <sub>1</sub> <input type="checkbox"/> <sub>2</sub> <input type="checkbox"/> <sub>3</sub> <input type="checkbox"/> <sub>4</sub> |   |   |   |                             |
| CH                        |                | mmol/L                                           | <input type="checkbox"/> <sub>1</sub> <input type="checkbox"/> <sub>2</sub> <input type="checkbox"/> <sub>3</sub> <input type="checkbox"/> <sub>4</sub> |   |   |   |                             |
| <b>C-reactive protein</b> |                | <b>Report date:</b> 201 _ Year _ _ Month _ _ Day |                                                                                                                                                         |   |   |   |                             |
| CRP                       |                | mg/L                                             | <input type="checkbox"/> <sub>1</sub> <input type="checkbox"/> <sub>2</sub> <input type="checkbox"/> <sub>3</sub> <input type="checkbox"/> <sub>4</sub> |   |   |   |                             |

\* Clinical significance judgment: (1) normal (2) abnormal but no clinical significance (3) abnormal and clinical significance (4) not investigated.

### Is there a combined medication?

<sub>0</sub>No

<sub>1</sub>Yes→Please fill out the “Combined Medication Record Form” on page 47.

### Are there any adverse events?

<sub>0</sub>No

<sub>1</sub>Yes→Please fill out the “Adverse Event Record Form” on page 48 in detail.

### Is there an unscheduled laboratory check?

<sub>0</sub>No

<sub>1</sub>Yes→Record the results to “Unplanned Laboratory Inspection Results” on page 49

**Release of test drug:** Ginkgo biloba drop pills 900 pills (10 bottles)

**Researcher's signature:** \_\_\_\_\_ **Date:** 201|\_|Year|\_|\_|Month|\_|\_|Day

|                        |                           |                                |                                               |
|------------------------|---------------------------|--------------------------------|-----------------------------------------------|
| Visit11<br>58Week±4Day | Drug number<br> _ _ _ _ _ | Patient initials<br> _ _ _ _ _ | Date of visit<br>201 _ Year _ _ Month _ _ Day |
|------------------------|---------------------------|--------------------------------|-----------------------------------------------|

**Vital signs**

| Body temperature (°C) | Breathe (Times/minute) | Heart rate (Times/minute) | Blood pressure (mmHg) |
|-----------------------|------------------------|---------------------------|-----------------------|
| _ _ _ _               | _ _                    | _ _ _ _                   | _ _ _ / _ _ _         |

Seattle Angina Questionnaire(SAQ)

Score \*: |\_|\_|\_|\_|

1. In the past 4 weeks, the following restrictions have been caused by chest pain, chest tightness and angina:

|                                                  | Severely restricted        | Moderately restricted      | Mildly restricted          | Slightly restricted        | Unrestricted               | Limited for other reasons  |
|--------------------------------------------------|----------------------------|----------------------------|----------------------------|----------------------------|----------------------------|----------------------------|
| Dress yourself                                   | <input type="checkbox"/> 1 | <input type="checkbox"/> 2 | <input type="checkbox"/> 3 | <input type="checkbox"/> 4 | <input type="checkbox"/> 5 | <input type="checkbox"/> 6 |
| Indoor walk                                      | <input type="checkbox"/> 1 | <input type="checkbox"/> 2 | <input type="checkbox"/> 3 | <input type="checkbox"/> 4 | <input type="checkbox"/> 5 | <input type="checkbox"/> 6 |
| Take a shower                                    | <input type="checkbox"/> 1 | <input type="checkbox"/> 2 | <input type="checkbox"/> 3 | <input type="checkbox"/> 4 | <input type="checkbox"/> 5 | <input type="checkbox"/> 6 |
| Climbing or stairway (three floors, non-stop)    | <input type="checkbox"/> 1 | <input type="checkbox"/> 2 | <input type="checkbox"/> 3 | <input type="checkbox"/> 4 | <input type="checkbox"/> 5 | <input type="checkbox"/> 6 |
| Outdoor activities or pick up                    | <input type="checkbox"/> 1 | <input type="checkbox"/> 2 | <input type="checkbox"/> 3 | <input type="checkbox"/> 4 | <input type="checkbox"/> 5 | <input type="checkbox"/> 6 |
| Walk lightly (one kilometer)                     | <input type="checkbox"/> 1 | <input type="checkbox"/> 2 | <input type="checkbox"/> 3 | <input type="checkbox"/> 4 | <input type="checkbox"/> 5 | <input type="checkbox"/> 6 |
| Jogging (one kilometer)                          | <input type="checkbox"/> 1 | <input type="checkbox"/> 2 | <input type="checkbox"/> 3 | <input type="checkbox"/> 4 | <input type="checkbox"/> 5 | <input type="checkbox"/> 6 |
| Lift or move heavy objects                       | <input type="checkbox"/> 1 | <input type="checkbox"/> 2 | <input type="checkbox"/> 3 | <input type="checkbox"/> 4 | <input type="checkbox"/> 5 | <input type="checkbox"/> 6 |
| Strenuous exercise (such as swimming or playing) | <input type="checkbox"/> 1 | <input type="checkbox"/> 2 | <input type="checkbox"/> 3 | <input type="checkbox"/> 4 | <input type="checkbox"/> 5 | <input type="checkbox"/> 6 |

2. Compared with 4 weeks ago, when doing the maximum intensity of activity, chest pain, chest tightness and angina pectoris:

1 obviously increase 2 Slight increase 3 the same 4 Minor reduction 5 obviously decrease

3. The average number of episodes of chest pain, chest tightness, and angina in the past 4 weeks:

1 ≥four times/day 2 One-three times/day 3 ≥three times/week 4 one-two times/week

5 < 1 time/week 6 no episode

4. The average number of nitro drugs (such as nitroglycerin) in chest pain, chest tightness, and angina pectoris over the past 4 weeks:

1 ≥four times/day 2 One-three times/day 3 ≥three times/week 4 one-two times/week

5 < 1 time/week 6 no episode

5. Due to chest pain, chest tightness and angina pectoris, follow the doctor's advice:

1 Serious 2 Moderate 3 Minor 4 Very little 5 No 6 Doctor did not administer

6. Satisfaction with various measures for treating chest pain, chest tightness and angina:

1 Dissatisfied 2 Most dissatisfied 3 Partially satisfied 4 Most satisfied 5 Highly satisfied

|                        |                         |                              |                                               |
|------------------------|-------------------------|------------------------------|-----------------------------------------------|
| Visit11<br>58Week±4Day | Drug number<br> _ _ _ _ | Patient initials<br> _ _ _ _ | Date of visit<br>201 _ Year _ _ Month _ _ Day |
|------------------------|-------------------------|------------------------------|-----------------------------------------------|

7. Satisfaction with the doctor's explanation for chest pain, chest tightness and angina:

<sub>1</sub> Dissatisfied <sub>2</sub> Most dissatisfied <sub>3</sub> Partially satisfied <sub>4</sub> Most satisfied <sub>5</sub> Highly satisfied

8. Overall, satisfaction with the current treatment of chest pain, chest tightness and angina:

<sub>1</sub> Dissatisfied <sub>2</sub> Most dissatisfied <sub>3</sub> Partially satisfied <sub>4</sub> Most satisfied <sub>5</sub> Highly satisfied

9. In the past 4 weeks, chest pain, chest tightness and angina have affected the level of fun in life:

<sub>1</sub> Dissatisfied <sub>2</sub> Most dissatisfied <sub>3</sub> Partially satisfied <sub>4</sub> Most satisfied <sub>5</sub> Highly satisfied

10. If you have chest pain, chest tightness and angina in your future life, how would you feel?

<sub>1</sub> Dissatisfied <sub>2</sub> Most dissatisfied <sub>3</sub> Partially satisfied <sub>4</sub> Most satisfied <sub>5</sub> Highly satisfied

11. Concerns about heart attack and sudden death:

<sub>1</sub> Always worried <sub>2</sub> Frequently worried <sub>3</sub> Sometimes worried <sub>4</sub> Very little worried <sub>5</sub> Never worry

\* The Seattle Angina Scale is divided into 5 items and 19 items: Physical activity limitation (PL, question 1), angina stable state (AS, question 2), angina pectoris (AF, question 3-4), treatment satisfaction (TS), question 5-8), disease cognition (DP, question 9-11). After scoring the 19 items of the 5 major items one by one, each score is forwarded. The standard score = (actual score - the lowest score in this aspect) / (the highest score in this aspect - the lowest score in this aspect) ✖ 100, the higher the score, the better the quality of life and the functional state of the patient.

### Angina pectoris symptom score

Score \*: |\_|\_|\_|\_|

|                          |                                          |                                                                                                                                                                                                                                                                                              |                                                                                                                                                                                                                                                                             |                                                                                                                                                                                                                                                                                                                 |
|--------------------------|------------------------------------------|----------------------------------------------------------------------------------------------------------------------------------------------------------------------------------------------------------------------------------------------------------------------------------------------|-----------------------------------------------------------------------------------------------------------------------------------------------------------------------------------------------------------------------------------------------------------------------------|-----------------------------------------------------------------------------------------------------------------------------------------------------------------------------------------------------------------------------------------------------------------------------------------------------------------|
| Number of angina attacks | <input type="checkbox"/> <sub>0</sub> No | <input type="checkbox"/> <sub>2</sub> 2-6 episodes per week                                                                                                                                                                                                                                  | <input type="checkbox"/> <sub>4</sub> 1-3 times a day                                                                                                                                                                                                                       | <input type="checkbox"/> <sub>6</sub> more than 4 episodes per day                                                                                                                                                                                                                                              |
| Angina duration          | <input type="checkbox"/> <sub>0</sub> No | <input type="checkbox"/> <sub>2</sub> Each time the pain lasts less than or equal to 5 minutes                                                                                                                                                                                               | <input type="checkbox"/> <sub>4</sub> Each time the pain lasts longer than 5 minutes and less than 10                                                                                                                                                                       | <input type="checkbox"/> <sub>6</sub> Each time the pain lasts for 10 minutes or more                                                                                                                                                                                                                           |
| Angina pain level        | <input type="checkbox"/> <sub>0</sub> No | <input type="checkbox"/> <sub>2</sub> Physical activity that is heavier than daily activities causes angina and daily activities are asymptomatic. Activities that can cause angina, such as trotting on the ground, fast or holding heavy objects on the third floor, up steep slopes, etc. | <input type="checkbox"/> <sub>4</sub> Daily physical activity causes angina and daily activities are slightly limited. Activities that can cause angina, such as walking 3-4 stations (3-4 miles) at normal speed under normal conditions, on the third floor, uphill, etc. | <input type="checkbox"/> <sub>6</sub> Lighter physical activity than daily activities causes angina and daily activities are significantly limited. Activities that can cause angina, such as walking 1-2 stations (1-2 miles) at normal speed under normal conditions, on the second floor, gentle slope, etc. |
| Nitroglycerin dosage     | <input type="checkbox"/> <sub>0</sub> No | <input type="checkbox"/> <sub>2</sub> 1-4 tablets per week                                                                                                                                                                                                                                   | <input type="checkbox"/> <sub>4</sub> 5-9 tablets per week                                                                                                                                                                                                                  | <input type="checkbox"/> <sub>6</sub> Take more than 10 tablets a week                                                                                                                                                                                                                                          |

|                        |                           |                                |                                               |
|------------------------|---------------------------|--------------------------------|-----------------------------------------------|
| Visit11<br>58Week±4Day | Drug number<br> _ _ _ _ _ | Patient initials<br> _ _ _ _ _ | Date of visit<br>201 _ Year _ _ Month _ _ Day |
|------------------------|---------------------------|--------------------------------|-----------------------------------------------|

### Laboratory inspection

| Indicator                        | Measured Value | Unit                                             | Clinical significance *                                                                                                                                 |   |   |   | Anomalous cause explanation |
|----------------------------------|----------------|--------------------------------------------------|---------------------------------------------------------------------------------------------------------------------------------------------------------|---|---|---|-----------------------------|
|                                  |                |                                                  | 1                                                                                                                                                       | 2 | 3 | 4 |                             |
| <b>Blood routine</b>             |                | <b>Report date:</b> 201 _ Year _ _ Month _ _ Day |                                                                                                                                                         |   |   |   |                             |
| HGB                              |                | g/L                                              | <input type="checkbox"/> <sub>1</sub> <input type="checkbox"/> <sub>2</sub> <input type="checkbox"/> <sub>3</sub> <input type="checkbox"/> <sub>4</sub> |   |   |   |                             |
| RBC                              |                | ×10 <sup>12</sup> /L                             | <input type="checkbox"/> <sub>1</sub> <input type="checkbox"/> <sub>2</sub> <input type="checkbox"/> <sub>3</sub> <input type="checkbox"/> <sub>4</sub> |   |   |   |                             |
| WBC                              |                | ×10 <sup>9</sup> /L                              | <input type="checkbox"/> <sub>1</sub> <input type="checkbox"/> <sub>2</sub> <input type="checkbox"/> <sub>3</sub> <input type="checkbox"/> <sub>4</sub> |   |   |   |                             |
| PLT                              |                | ×10 <sup>9</sup> /L                              | <input type="checkbox"/> <sub>1</sub> <input type="checkbox"/> <sub>2</sub> <input type="checkbox"/> <sub>3</sub> <input type="checkbox"/> <sub>4</sub> |   |   |   |                             |
| <b>Urine routine</b>             |                | <b>Report date:</b> 201 _ Year _ _ Month _ _ Day |                                                                                                                                                         |   |   |   |                             |
| Urine PH                         |                |                                                  | <input type="checkbox"/> <sub>1</sub> <input type="checkbox"/> <sub>2</sub> <input type="checkbox"/> <sub>3</sub> <input type="checkbox"/> <sub>4</sub> |   |   |   |                             |
| PRO                              |                | —                                                | <input type="checkbox"/> <sub>1</sub> <input type="checkbox"/> <sub>2</sub> <input type="checkbox"/> <sub>3</sub> <input type="checkbox"/> <sub>4</sub> |   |   |   |                             |
| ERY                              |                | /HPF                                             | <input type="checkbox"/> <sub>1</sub> <input type="checkbox"/> <sub>2</sub> <input type="checkbox"/> <sub>3</sub> <input type="checkbox"/> <sub>4</sub> |   |   |   |                             |
| White blood cells (LEU)          |                | /HPF                                             | <input type="checkbox"/> <sub>1</sub> <input type="checkbox"/> <sub>2</sub> <input type="checkbox"/> <sub>3</sub> <input type="checkbox"/> <sub>4</sub> |   |   |   |                             |
| <b>Liver and kidney function</b> |                | <b>Report date:</b> 201 _ Year _ _ Month _ _ Day |                                                                                                                                                         |   |   |   |                             |
| ALT                              |                | U/L                                              | <input type="checkbox"/> <sub>1</sub> <input type="checkbox"/> <sub>2</sub> <input type="checkbox"/> <sub>3</sub> <input type="checkbox"/> <sub>4</sub> |   |   |   |                             |
| AST                              |                | U/L                                              | <input type="checkbox"/> <sub>1</sub> <input type="checkbox"/> <sub>2</sub> <input type="checkbox"/> <sub>3</sub> <input type="checkbox"/> <sub>4</sub> |   |   |   |                             |
| ALP                              |                | U/L                                              | <input type="checkbox"/> <sub>1</sub> <input type="checkbox"/> <sub>2</sub> <input type="checkbox"/> <sub>3</sub> <input type="checkbox"/> <sub>4</sub> |   |   |   |                             |
| TBIL                             |                | μmol/L                                           | <input type="checkbox"/> <sub>1</sub> <input type="checkbox"/> <sub>2</sub> <input type="checkbox"/> <sub>3</sub> <input type="checkbox"/> <sub>4</sub> |   |   |   |                             |
| γ-GT                             |                | U/L                                              | <input type="checkbox"/> <sub>1</sub> <input type="checkbox"/> <sub>2</sub> <input type="checkbox"/> <sub>3</sub> <input type="checkbox"/> <sub>4</sub> |   |   |   |                             |
| TBA                              |                | μmol/L                                           | <input type="checkbox"/> <sub>1</sub> <input type="checkbox"/> <sub>2</sub> <input type="checkbox"/> <sub>3</sub> <input type="checkbox"/> <sub>4</sub> |   |   |   |                             |
| BUN                              |                | mmol/L                                           | <input type="checkbox"/> <sub>1</sub> <input type="checkbox"/> <sub>2</sub> <input type="checkbox"/> <sub>3</sub> <input type="checkbox"/> <sub>4</sub> |   |   |   |                             |
| Cr                               |                | μmol/L                                           | <input type="checkbox"/> <sub>1</sub> <input type="checkbox"/> <sub>2</sub> <input type="checkbox"/> <sub>3</sub> <input type="checkbox"/> <sub>4</sub> |   |   |   |                             |
| <b>blood sugar</b>               |                | <b>Report date:</b> 201 _ Year _ _ Month _ _ Day |                                                                                                                                                         |   |   |   |                             |
| FPG                              |                | mmol/L                                           | <input type="checkbox"/> <sub>1</sub> <input type="checkbox"/> <sub>2</sub> <input type="checkbox"/> <sub>3</sub> <input type="checkbox"/> <sub>4</sub> |   |   |   |                             |
| 2hPG                             |                | mmol/L                                           | <input type="checkbox"/> <sub>1</sub> <input type="checkbox"/> <sub>2</sub> <input type="checkbox"/> <sub>3</sub> <input type="checkbox"/> <sub>4</sub> |   |   |   |                             |
| HbA1c                            |                | mg/dl                                            | <input type="checkbox"/> <sub>1</sub> <input type="checkbox"/> <sub>2</sub> <input type="checkbox"/> <sub>3</sub> <input type="checkbox"/> <sub>4</sub> |   |   |   |                             |
| Fasting insulin                  |                | μU/ml                                            | <input type="checkbox"/> <sub>1</sub> <input type="checkbox"/> <sub>2</sub> <input type="checkbox"/> <sub>3</sub> <input type="checkbox"/> <sub>4</sub> |   |   |   |                             |

|                        |                         |                              |                                               |
|------------------------|-------------------------|------------------------------|-----------------------------------------------|
| Visit11<br>58Week±4Day | Drug number<br> _ _ _ _ | Patient initials<br> _ _ _ _ | Date of visit<br>201 _ Year _ _ Month _ _ Day |
|------------------------|-------------------------|------------------------------|-----------------------------------------------|

|                           |  |                                                  |                                                                                                                                                         |  |
|---------------------------|--|--------------------------------------------------|---------------------------------------------------------------------------------------------------------------------------------------------------------|--|
| <b>Blood lipid</b>        |  | <b>Report date:</b> 201 _ Year _ _ Month _ _ Day |                                                                                                                                                         |  |
| HDL-C                     |  | mmol/L                                           | <input type="checkbox"/> <sub>1</sub> <input type="checkbox"/> <sub>2</sub> <input type="checkbox"/> <sub>3</sub> <input type="checkbox"/> <sub>4</sub> |  |
| LDL-C                     |  | mmol/L                                           | <input type="checkbox"/> <sub>1</sub> <input type="checkbox"/> <sub>2</sub> <input type="checkbox"/> <sub>3</sub> <input type="checkbox"/> <sub>4</sub> |  |
| TG                        |  | mmol/L                                           | <input type="checkbox"/> <sub>1</sub> <input type="checkbox"/> <sub>2</sub> <input type="checkbox"/> <sub>3</sub> <input type="checkbox"/> <sub>4</sub> |  |
| CH                        |  | mmol/L                                           | <input type="checkbox"/> <sub>1</sub> <input type="checkbox"/> <sub>2</sub> <input type="checkbox"/> <sub>3</sub> <input type="checkbox"/> <sub>4</sub> |  |
| <b>C-reactive protein</b> |  | <b>Report date:</b> 201 _ Year _ _ Month _ _ Day |                                                                                                                                                         |  |
| CRP                       |  | mg/L                                             | <input type="checkbox"/> <sub>1</sub> <input type="checkbox"/> <sub>2</sub> <input type="checkbox"/> <sub>3</sub> <input type="checkbox"/> <sub>4</sub> |  |
| <b>Electrocardiogram</b>  |  | <b>Report date:</b> 201 _ Year _ _ Month _ _ Day |                                                                                                                                                         |  |
| ECG                       |  | —                                                | <input type="checkbox"/> <sub>1</sub> <input type="checkbox"/> <sub>2</sub> <input type="checkbox"/> <sub>3</sub> <input type="checkbox"/> <sub>4</sub> |  |

\* Clinical significance judgment: (1) normal (2) abnormal but no clinical significance (3) abnormal and clinical significance (4) not investigated.

**Is the test drug returned?**

|                                                                                                                                                                                                                                                                                                |
|------------------------------------------------------------------------------------------------------------------------------------------------------------------------------------------------------------------------------------------------------------------------------------------------|
| <input type="checkbox"/> <sub>0</sub> No→Unreturned reason: <input type="checkbox"/> <sub>2</sub> Take all <input type="checkbox"/> <sub>3</sub> Lost <input type="checkbox"/> <sub>4</sub> Other _____<br><input type="checkbox"/> <sub>1</sub> Yes→ Ginkgo biloba drop pills  _ _ _ _  pills |
|------------------------------------------------------------------------------------------------------------------------------------------------------------------------------------------------------------------------------------------------------------------------------------------------|

**Is there a combined medication?**

|                                                                                                                                                         |
|---------------------------------------------------------------------------------------------------------------------------------------------------------|
| <input type="checkbox"/> <sub>0</sub> No<br><input type="checkbox"/> <sub>1</sub> Yes→Please fill out the “Combined Medication Record Form” on page 47. |
|---------------------------------------------------------------------------------------------------------------------------------------------------------|

**Are there any adverse events?**

|                                                                                                                                                             |
|-------------------------------------------------------------------------------------------------------------------------------------------------------------|
| <input type="checkbox"/> <sub>0</sub> No<br><input type="checkbox"/> <sub>1</sub> Yes→Please fill out the “Adverse Event Record Form” on page 48 in detail. |
|-------------------------------------------------------------------------------------------------------------------------------------------------------------|

**Is there an unscheduled laboratory check?**

|                                                                                                                                                                  |
|------------------------------------------------------------------------------------------------------------------------------------------------------------------|
| <input type="checkbox"/> <sub>0</sub> No<br><input type="checkbox"/> <sub>1</sub> Yes→Record the results to “Unplanned Laboratory Inspection Results” on page 49 |
|------------------------------------------------------------------------------------------------------------------------------------------------------------------|

**Researcher's signature:** \_\_\_\_\_ **Date:** 201|\_|Year|\_|\_|Month|\_|\_|Day



|                         |                              |                                               |
|-------------------------|------------------------------|-----------------------------------------------|
| Drug number<br> _ _ _ _ | Patient initials<br> _ _ _ _ | Date of visit<br>201 _ Year _ _ Month _ _ Day |
|-------------------------|------------------------------|-----------------------------------------------|

**Combined medication record**

Are there any combined medications during the trial?  No  Yes → please fill in the form below

| Drug Name                                                                                                                                                           | Indications or medication reasons | Single dose                                                                                                                                                                                             | Unit (01-11) | Number of doses (01-08) | Route of administration (01-10)                                                                                                                                                                                                               | Start medication date           | Still using                                                                           | End of medication date          |
|---------------------------------------------------------------------------------------------------------------------------------------------------------------------|-----------------------------------|---------------------------------------------------------------------------------------------------------------------------------------------------------------------------------------------------------|--------------|-------------------------|-----------------------------------------------------------------------------------------------------------------------------------------------------------------------------------------------------------------------------------------------|---------------------------------|---------------------------------------------------------------------------------------|---------------------------------|
|                                                                                                                                                                     |                                   |                                                                                                                                                                                                         | _ _          | _ _                     | _ _                                                                                                                                                                                                                                           | _ _ _ _  Year _ _ Month _ _ Day | <input type="checkbox"/> <sub>1</sub> Yes<br><input type="checkbox"/> <sub>0</sub> No | _ _ _ _  Year _ _ Month _ _ Day |
|                                                                                                                                                                     |                                   |                                                                                                                                                                                                         | _ _          | _ _                     | _ _                                                                                                                                                                                                                                           | _ _ _ _  Year _ _ Month _ _ Day | <input type="checkbox"/> <sub>1</sub> Yes<br><input type="checkbox"/> <sub>0</sub> No | _ _ _ _  Year _ _ Month _ _ Day |
|                                                                                                                                                                     |                                   |                                                                                                                                                                                                         | _ _          | _ _                     | _ _                                                                                                                                                                                                                                           | _ _ _ _  Year _ _ Month _ _ Day | <input type="checkbox"/> <sub>1</sub> Yes<br><input type="checkbox"/> <sub>0</sub> No | _ _ _ _  Year _ _ Month _ _ Day |
|                                                                                                                                                                     |                                   |                                                                                                                                                                                                         | _ _          | _ _                     | _ _                                                                                                                                                                                                                                           | _ _ _ _  Year _ _ Month _ _ Day | <input type="checkbox"/> <sub>1</sub> Yes<br><input type="checkbox"/> <sub>0</sub> No | _ _ _ _  Year _ _ Month _ _ Day |
|                                                                                                                                                                     |                                   |                                                                                                                                                                                                         | _ _          | _ _                     | _ _                                                                                                                                                                                                                                           | _ _ _ _  Year _ _ Month _ _ Day | <input type="checkbox"/> <sub>1</sub> Yes<br><input type="checkbox"/> <sub>0</sub> No | _ _ _ _  Year _ _ Month _ _ Day |
|                                                                                                                                                                     |                                   |                                                                                                                                                                                                         | _ _          | _ _                     | _ _                                                                                                                                                                                                                                           | _ _ _ _  Year _ _ Month _ _ Day | <input type="checkbox"/> <sub>1</sub> Yes<br><input type="checkbox"/> <sub>0</sub> No | _ _ _ _  Year _ _ Month _ _ Day |
|                                                                                                                                                                     |                                   |                                                                                                                                                                                                         | _ _          | _ _                     | _ _                                                                                                                                                                                                                                           | _ _ _ _  Year _ _ Month _ _ Day | <input type="checkbox"/> <sub>1</sub> Yes<br><input type="checkbox"/> <sub>0</sub> No | _ _ _ _  Year _ _ Month _ _ Day |
| <b>Unit code</b><br>01=microgram    07=Capsule<br>02=milligram    08=piece<br>03=g    04=ml    09=drops<br>05=milliequivalents    11=Others<br>06=internationalunit |                                   | <b>Daily dosing code</b><br>01=1 time per day    05=Use when necessary<br>02=2 times a day    06=Use every other day<br>03=3 times a day    08=Others<br>04=4 times a day<br>07=Use before going to bed |              |                         | <b>Route of administration</b><br>01=Oral    07=inhalation inhalation<br>02 = vein    08=Personal use<br>03=intramuscular injection    09=Local use<br>04=Subcutaneous injection    10 = other<br>05=Intradermal injection<br>06 = inhalation |                                 |                                                                                       |                                 |

Researcher's signature: \_\_\_\_\_ Date: 201|\_|Year|\_|\_|Month|\_|\_|Day

|                         |                              |                                               |
|-------------------------|------------------------------|-----------------------------------------------|
| Drug number<br> _ _ _ _ | Patient initials<br> _ _ _ _ | Date of visit<br>201 _ Year _ _ Month _ _ Day |
|-------------------------|------------------------------|-----------------------------------------------|

**Adverse event record**

Are there any adverse events during the trial?  No  Yes → please fill in the form below

| Adverse event name                                                                 | Date of occurrence                                                                                                                                               | Severity 1-3                                                                                                                                                                  | Relationship with test drugs 1-5 | Measures taken for test drugs 1-5 | Ending 1-5 | End date                                                                                 | Whether serious adverse events                              | Is there a combined medication?                             |
|------------------------------------------------------------------------------------|------------------------------------------------------------------------------------------------------------------------------------------------------------------|-------------------------------------------------------------------------------------------------------------------------------------------------------------------------------|----------------------------------|-----------------------------------|------------|------------------------------------------------------------------------------------------|-------------------------------------------------------------|-------------------------------------------------------------|
|                                                                                    | _ _ _ _  Year _ _ Month _ _ Day                                                                                                                                  | _                                                                                                                                                                             | _                                | _                                 | _          | _ _ _ _  Year _ _ Month _ _ Day                                                          | <input type="checkbox"/> Yes<br><input type="checkbox"/> No | <input type="checkbox"/> Yes<br><input type="checkbox"/> No |
|                                                                                    | _ _ _ _  Year _ _ Month _ _ Day                                                                                                                                  | _                                                                                                                                                                             | _                                | _                                 | _          | _ _ _ _  Year _ _ Month _ _ Day                                                          | <input type="checkbox"/> Yes<br><input type="checkbox"/> No | <input type="checkbox"/> Yes<br><input type="checkbox"/> No |
|                                                                                    | _ _ _ _  Year _ _ Month _ _ Day                                                                                                                                  | _                                                                                                                                                                             | _                                | _                                 | _          | _ _ _ _  Year _ _ Month _ _ Day                                                          | <input type="checkbox"/> Yes<br><input type="checkbox"/> No | <input type="checkbox"/> Yes<br><input type="checkbox"/> No |
|                                                                                    | _ _ _ _  Year _ _ Month _ _ Day                                                                                                                                  | _                                                                                                                                                                             | _                                | _                                 | _          | _ _ _ _  Year _ _ Month _ _ Day                                                          | <input type="checkbox"/> Yes<br><input type="checkbox"/> No | <input type="checkbox"/> Yes<br><input type="checkbox"/> No |
| <b>Severity coding (according to CTCAE3.0)</b><br>1=mild<br>2=moderate<br>3=severe | <b>Coding with test drug</b><br>1= definitely relevant<br>2=may be relevant<br>3=may not be relevant<br>4= definitely has nothing to do<br>5=Unable to determine | <b>Code of action for the test drug</b><br>1=no action taken<br>2=reduce the dose<br>3=increase the dose<br>4=suspension of treatment<br>5=permanent termination of treatment |                                  |                                   |            | <b>Ending code</b><br>1=recovery<br>2=mitigation<br>3=continuous<br>4=death<br>5=unknown |                                                             |                                                             |

Researcher's signature: \_\_\_\_\_ Date: 201|\_|Year|\_|\_|Month|\_|\_|Day

|                         |                              |                                               |
|-------------------------|------------------------------|-----------------------------------------------|
| Drug number<br> _ _ _ _ | Patient initials<br> _ _ _ _ | Date of visit<br>201 _ Year _ _ Month _ _ Day |
|-------------------------|------------------------------|-----------------------------------------------|

**Unplanned laboratory test results**

Is there an unscheduled laboratory test during the trial?  No  Yes → please fill in the form below

| Check date<br>(yyyymmdd) | Check item | Examination result (marked unit) | Check the reason | Clinical significance *    |                            |                            |                            | Whether it has an impact on this study                          |
|--------------------------|------------|----------------------------------|------------------|----------------------------|----------------------------|----------------------------|----------------------------|-----------------------------------------------------------------|
|                          |            |                                  |                  | 1                          | 2                          | 3                          | 4                          |                                                                 |
|                          |            |                                  |                  | <input type="checkbox"/> 1 | <input type="checkbox"/> 2 | <input type="checkbox"/> 3 | <input type="checkbox"/> 4 | <input type="checkbox"/> 1 Yes<br><input type="checkbox"/> 0 No |
|                          |            |                                  |                  | <input type="checkbox"/> 1 | <input type="checkbox"/> 2 | <input type="checkbox"/> 3 | <input type="checkbox"/> 4 | <input type="checkbox"/> 1 Yes<br><input type="checkbox"/> 0 No |
|                          |            |                                  |                  | <input type="checkbox"/> 1 | <input type="checkbox"/> 2 | <input type="checkbox"/> 3 | <input type="checkbox"/> 4 | <input type="checkbox"/> 1 Yes<br><input type="checkbox"/> 0 No |
|                          |            |                                  |                  | <input type="checkbox"/> 1 | <input type="checkbox"/> 2 | <input type="checkbox"/> 3 | <input type="checkbox"/> 4 | <input type="checkbox"/> 1 Yes<br><input type="checkbox"/> 0 No |
|                          |            |                                  |                  | <input type="checkbox"/> 1 | <input type="checkbox"/> 2 | <input type="checkbox"/> 3 | <input type="checkbox"/> 4 | <input type="checkbox"/> 1 Yes<br><input type="checkbox"/> 0 No |
|                          |            |                                  |                  | <input type="checkbox"/> 1 | <input type="checkbox"/> 2 | <input type="checkbox"/> 3 | <input type="checkbox"/> 4 | <input type="checkbox"/> 1 Yes<br><input type="checkbox"/> 0 No |
|                          |            |                                  |                  | <input type="checkbox"/> 1 | <input type="checkbox"/> 2 | <input type="checkbox"/> 3 | <input type="checkbox"/> 4 | <input type="checkbox"/> 1 Yes<br><input type="checkbox"/> 0 No |
|                          |            |                                  |                  | <input type="checkbox"/> 1 | <input type="checkbox"/> 2 | <input type="checkbox"/> 3 | <input type="checkbox"/> 4 | <input type="checkbox"/> 1 Yes<br><input type="checkbox"/> 0 No |
|                          |            |                                  |                  | <input type="checkbox"/> 1 | <input type="checkbox"/> 2 | <input type="checkbox"/> 3 | <input type="checkbox"/> 4 | <input type="checkbox"/> 1 Yes<br><input type="checkbox"/> 0 No |
|                          |            |                                  |                  | <input type="checkbox"/> 1 | <input type="checkbox"/> 2 | <input type="checkbox"/> 3 | <input type="checkbox"/> 4 | <input type="checkbox"/> 1 Yes<br><input type="checkbox"/> 0 No |
|                          |            |                                  |                  | <input type="checkbox"/> 1 | <input type="checkbox"/> 2 | <input type="checkbox"/> 3 | <input type="checkbox"/> 4 | <input type="checkbox"/> 1 Yes<br><input type="checkbox"/> 0 No |
|                          |            |                                  |                  | <input type="checkbox"/> 1 | <input type="checkbox"/> 2 | <input type="checkbox"/> 3 | <input type="checkbox"/> 4 | <input type="checkbox"/> 1 Yes<br><input type="checkbox"/> 0 No |
|                          |            |                                  |                  | <input type="checkbox"/> 1 | <input type="checkbox"/> 2 | <input type="checkbox"/> 3 | <input type="checkbox"/> 4 | <input type="checkbox"/> 1 Yes<br><input type="checkbox"/> 0 No |
|                          |            |                                  |                  | <input type="checkbox"/> 1 | <input type="checkbox"/> 2 | <input type="checkbox"/> 3 | <input type="checkbox"/> 4 | <input type="checkbox"/> 1 Yes<br><input type="checkbox"/> 0 No |
|                          |            |                                  |                  | <input type="checkbox"/> 1 | <input type="checkbox"/> 2 | <input type="checkbox"/> 3 | <input type="checkbox"/> 4 | <input type="checkbox"/> 1 Yes<br><input type="checkbox"/> 0 No |
|                          |            |                                  |                  | <input type="checkbox"/> 1 | <input type="checkbox"/> 2 | <input type="checkbox"/> 3 | <input type="checkbox"/> 4 | <input type="checkbox"/> 1 Yes<br><input type="checkbox"/> 0 No |
|                          |            |                                  |                  | <input type="checkbox"/> 1 | <input type="checkbox"/> 2 | <input type="checkbox"/> 3 | <input type="checkbox"/> 4 | <input type="checkbox"/> 1 Yes<br><input type="checkbox"/> 0 No |
|                          |            |                                  |                  | <input type="checkbox"/> 1 | <input type="checkbox"/> 2 | <input type="checkbox"/> 3 | <input type="checkbox"/> 4 | <input type="checkbox"/> 1 Yes<br><input type="checkbox"/> 0 No |
|                          |            |                                  |                  | <input type="checkbox"/> 1 | <input type="checkbox"/> 2 | <input type="checkbox"/> 3 | <input type="checkbox"/> 4 | <input type="checkbox"/> 1 Yes<br><input type="checkbox"/> 0 No |
|                          |            |                                  |                  | <input type="checkbox"/> 1 | <input type="checkbox"/> 2 | <input type="checkbox"/> 3 | <input type="checkbox"/> 4 | <input type="checkbox"/> 1 Yes<br><input type="checkbox"/> 0 No |

\* Clinical significance judgment: (1) normal (2) abnormal but no clinical significance (3) abnormal and clinical significance (4) not investigated.

Researcher's signature: \_\_\_\_\_ Date: 201|\_|Year|\_|\_|Month|\_|\_|Day

|                           |                                |                                               |
|---------------------------|--------------------------------|-----------------------------------------------|
| Drug number<br> _ _ _ _ _ | Patient initials<br> _ _ _ _ _ | Date of visit<br>201 _ Year _ _ Month _ _ Day |
|---------------------------|--------------------------------|-----------------------------------------------|

**Medication compliance**

Should take the dose: Ginkgo biloba drop pills/Ginkgo biloba drop pills simulation agent 5040 pills (56 bottles)

Actual dose: |\_|\_|\_|\_|Pills; lost doses |\_|\_|\_|\_|Pills.

Compliance with medication = actual dose / dose of medication × 100% = |\_|\_|\_|. |\_|\_|\_|%

**Summary of test completion**

Subject's first medication date: 201|\_|Year|\_|\_|Month|\_|\_|Day

Subject's last medication date: 201|\_|Year|\_|\_|Month|\_|\_|Day

Does the subject have a concomitant medication during the trial? \_0No \_1Yes→Please fill in the “Consolidated Drug Record Form”

Did the subject have an adverse event during the trial? \_0No \_1Yes→Please fill in the “Adverse Event Record Form”

Did the subject have serious adverse events during the trial? \_0No \_1Yes→Please fill out the “Serious Adverse Event Report Form”

Did the subject complete a clinical trial? \_1Yes \_0No →Please fill out the form below

**Patient Suspension Test Date:** 201|\_|Year|\_|\_|Month|\_|\_|Day

**The first to propose a suspension test is: (please choose one)**

- \_1 patient
- \_2 test researcher
- \_3 sponsor
- \_4 other:

**The main reason for the suspension test is: (please choose one)**

- \_1 adverse events (insulated adverse events table)
- \_2 lack of efficacy
- \_3 violation of the test plan
- \_4 lost
- \_5 subject withdraws informed consent
- \_6 other reasons:

**Researcher's signature:** \_\_\_\_\_ **Date:** 201|\_|Year|\_|\_|Month|\_|\_|Day

|                             |                                  |                                               |
|-----------------------------|----------------------------------|-----------------------------------------------|
| Drug number<br> _ _ _ _ _ _ | Patient initials<br> _ _ _ _ _ _ | Date of visit<br>201 _ Year _ _ Month _ _ Day |
|-----------------------------|----------------------------------|-----------------------------------------------|

**Lead researcher review statement**

**I confirmed that the pages of the patient's case report form signed by me have been checked by me and confirmed that all information is true, accurate and in accordance with the research protocol requirements.**

**Signature of the main investigator:**

**Date:** 201|\_|Year|\_|\_|Month|\_|\_|Day

| Project                            |                      | Observation period   |                            |                              |                              |                              |                              |                              |                              |                              |                              |                               |                               |
|------------------------------------|----------------------|----------------------|----------------------------|------------------------------|------------------------------|------------------------------|------------------------------|------------------------------|------------------------------|------------------------------|------------------------------|-------------------------------|-------------------------------|
|                                    |                      | Baseline<br>(-7-0d ) | Visit1<br>(8week<br>±4day) | Visit 2<br>(10week±<br>4day) | Visit 3<br>(18week±<br>4day) | Visit 4<br>(20week±<br>4day) | Visit 5<br>(28week±<br>4day) | Visit 6<br>(30week±<br>4day) | Visit 7<br>(38week±<br>4day) | Visit 8<br>(40week±<br>4day) | Visit 9<br>(48week±<br>4day) | Visit 10<br>(50week±<br>4day) | Visit 11<br>(58week<br>±4day) |
| Signing informed consent           |                      | √                    |                            |                              |                              |                              |                              |                              |                              |                              |                              |                               |                               |
| Inclusion/exclusion criteria       |                      | √                    |                            |                              |                              |                              |                              |                              |                              |                              |                              |                               |                               |
| Medical history / demographic data |                      | √                    |                            |                              |                              |                              |                              |                              |                              |                              |                              |                               |                               |
| Laboratory inspection              | blood sugar          | √                    | √                          | √                            | √                            | √                            | √                            | √                            | √                            | √                            | √                            | √                             | √                             |
|                                    | Blood lipid          | √                    | √                          | √                            | √                            | √                            | √                            | √                            | √                            | √                            | √                            | √                             | √                             |
|                                    | CRP                  | √                    | √                          | √                            | √                            | √                            | √                            | √                            | √                            | √                            | √                            | √                             | √                             |
|                                    | Blood routine        | √                    | √                          |                              |                              |                              |                              |                              |                              |                              |                              |                               | √                             |
|                                    | Urine routine        | √                    | √                          |                              |                              |                              |                              |                              |                              |                              |                              |                               | √                             |
|                                    | liver function       | √                    | √                          |                              |                              |                              |                              |                              |                              |                              |                              |                               | √                             |
|                                    | Renal function       | √                    | √                          |                              |                              |                              |                              |                              |                              |                              |                              |                               | √                             |
|                                    | Urine pregnancy test | √                    |                            |                              |                              |                              |                              |                              |                              |                              |                              |                               |                               |
| vital                              | Body temperature,    | √                    | √                          |                              |                              |                              |                              |                              |                              |                              |                              |                               | √                             |

|                                            |                          |   |   |   |   |   |   |   |   |   |   |   |   |
|--------------------------------------------|--------------------------|---|---|---|---|---|---|---|---|---|---|---|---|
| signs                                      | breathing,<br>heart rate |   |   |   |   |   |   |   |   |   |   |   |   |
|                                            | blood<br>pressure        | √ | √ |   |   |   |   |   |   |   |   |   | √ |
| Physical examination                       |                          | √ |   |   |   |   |   |   |   |   |   |   | √ |
| 12-lead ECG                                |                          | √ | √ |   |   |   |   |   |   |   |   |   | √ |
| Angina pectoris<br>symptom score           |                          | √ | √ | √ | √ | √ | √ | √ | √ | √ | √ | √ | √ |
| Seattle Angina<br>Questionnaire            |                          | √ | √ | √ | √ | √ | √ | √ | √ | √ | √ | √ | √ |
| AE record                                  |                          |   | √ | √ | √ | √ | √ | √ | √ | √ | √ | √ | √ |
| combined<br>medication/treatment<br>record |                          | √ | √ | √ | √ | √ | √ | √ | √ | √ | √ | √ | √ |
| Distribute drugs                           |                          | √ |   | √ |   | √ |   | √ |   | √ |   | √ |   |
| Recover remaining test<br>drugs and count  |                          |   | √ |   | √ |   | √ |   | √ |   | √ |   | √ |
| Clinical efficacy<br>assessment            |                          |   |   |   |   |   |   |   |   |   |   |   | √ |
